# Supplementary material for: Effectiveness of the facility-based maternal near-miss case reviews in improving maternal and newborn quality of care in low-income and middle-income countries: a systematic review
Source: PubMed Central journal article supplement — BMJ Open. 2018 Apr 19;8(4):e019787. doi: 10.1136/bmjopen-2017-019787 (PMC5914892; doi:10.1136/bmjopen-2017-019787), 2018-04-19
Supplement: bmjopen-2017-019787.draft_revisions.pdf [file bmjopen-2017-019787.draft_revisions.pdf]

# BMJ Open

BMJ Open is committed to open peer review. As part of this commitment we make the peer review history of every article we publish publicly available.

When an article is published we post the peer reviewers' comments and the authors' responses online. We also post the versions of the paper that were used during peer review. These are the versions that the peer review comments apply to.

The versions of the paper that follow are the versions that were submitted during the peer review process. They are not the versions of record or the final published versions. They should not be cited or distributed as the published version of this manuscript.

BMJ Open is an open access journal and the full, final, typeset and author-corrected version of record of the manuscript is available on our site with no access controls, subscription charges or pay-per-view fees (<http://bmjopen.bmj.com>).

If you have any questions on BMJ Open's open peer review process please email [info.bmjopen@bmj.com](mailto:info.bmjopen@bmj.com)

# BMJ Open

## Effectiveness of the facility based maternal near-miss case reviews in improving maternal and newborn quality of care in low and middle income countries: systematic review

|                                 |                                                                                                                                                                                                                                                                                                                                                                                                                              |
|---------------------------------|------------------------------------------------------------------------------------------------------------------------------------------------------------------------------------------------------------------------------------------------------------------------------------------------------------------------------------------------------------------------------------------------------------------------------|
| Journal:                        | <i>BMJ Open</i>                                                                                                                                                                                                                                                                                                                                                                                                              |
| Manuscript ID                   | bmjopen-2017-019787                                                                                                                                                                                                                                                                                                                                                                                                          |
| Article Type:                   | Research                                                                                                                                                                                                                                                                                                                                                                                                                     |
| Date Submitted by the Author:   | 25-Sep-2017                                                                                                                                                                                                                                                                                                                                                                                                                  |
| Complete List of Authors:       | Lazzerini, Marzia; Institute for Maternal and Child Health IRCCS Burlo Garofolo, WHO Collaborating Centre<br>Richardson, Sonia ; Institute for Maternal and Child Health IRCCS Burlo Garofolo, WHO Collaborating Centre<br>Ciardelli, Valentina ; Department of obstetrics and gynaecology, Bentivoglio Hospital<br>Erenbourg, Anna ; Institute for Maternal and Child Health IRCCS Burlo Garofolo, WHO Collaborating Centre |
| <b>Primary Subject Heading</b>: | Global health                                                                                                                                                                                                                                                                                                                                                                                                                |
| Secondary Subject Heading:      | Health services research                                                                                                                                                                                                                                                                                                                                                                                                     |
| Keywords:                       | Quality in health care < HEALTH SERVICES ADMINISTRATION & MANAGEMENT, Clinical audit < HEALTH SERVICES ADMINISTRATION & MANAGEMENT, Maternal medicine < OBSTETRICS                                                                                                                                                                                                                                                           |
|                                 |                                                                                                                                                                                                                                                                                                                                                                                                                              |

SCHOLARONE™  
Manuscripts

# Effectiveness of the facility based maternal near-miss case reviews in improving maternal and newborn quality of care in low and middle income countries: systematic review

**Running title:** Effectiveness of NMCR on maternal and newborn quality of care in LMIC

Marzia Lazzerini,<sup>1</sup> Sonia Richardson,<sup>1</sup> Valentina Ciardelli,<sup>2</sup> Anna Erenbourg.<sup>1</sup>

<sup>1</sup> WHO Collaborating Centre for Maternal and Child Health, Institute for Maternal and Child Health IRCCS Burlo Garofolo, Via dell' Iстриa 65/1, 34137, Trieste, Italy.

<sup>2</sup> Department of obstetrics and gynaecology, Bentivoglio Hospital, Via Marconi, 35, 40010 Bentivoglio, Italy

## Authors' e-mail contacts for the online submission

ML: marzia.lazzerini@burlo.trieste.it

SR: sonia.richardson@burlo.trieste.it

VC: valenrico98@gmail.com

AE: anna.erenbourg@burlo.trieste.it

## Corresponding author

Marzia Lazzerini DTMH, MSc, PhD

WHO Collaborating Centre for Maternal and Child Health

Institute for Maternal and Child Health IRCCS Burlo Garofolo

Via dell'Iстриa 65/1, 34137, Trieste, ITALY

Tel: +39 040 3785 555

Fax: +39 040 3785 260

marzia.lazzerini@burlo.trieste.it

Abstract word count: 298

Text word count: 4377

## ABSTRACT

### Objectives

The maternal near-miss case review (NMCR) has been promoted by WHO as an approach to improve quality of care (QoC) at facility level. We reviewed the evidence on the effectiveness of the NMCR on QoC and maternal and perinatal health outcomes in low and middle-income countries (LMIC).

### Methods

This was a systematic review. Studies were searched for in six electronic databases (MEDLINE, Index Medicus, Web of Science, the Cochrane library, Embase, LILACS), with no language restrictions. Two authors independently screened papers and selected them for inclusion and independently extracted data. Maternal mortality was the primary outcome. Secondary outcomes included any outcome informing on any of the six dimensions of quality of care: efficacy, safety, efficiency, equity, accessibility and timely care, acceptability and patient-centered care.

### Results

Out of 24,822 papers retrieved, 17 studies from 11 countries were included. Maternal mortality measured before and after the implementation of the NMCR cycle significantly decreased (odds ratio (OR) 0.77, 95%CI 0.61 to 0.98, eight studies, 5,5573,043 women;  $I^2= 39\%$ ). A statistically significant reduction in the incidence of uterine rupture, post-partum haemorrhage, and maternal sepsis was observed in three out of six studies. Ten studies reporting on the process of maternal care when measured against pre-defined standards all showed some significant improvement. All studies reported that the NMCR resulted in some amelioration of the facility structure (physical structure, staffing, equipment, training, organization of care). Newborn outcomes were overall poorly reported: four studies showed no significant difference in perinatal mortality. Patient satisfaction and equity were also poorly reported.

### Conclusions

Policy makers should consider implementing the maternal NMCR cycle approach among strategies aiming at improving QoC and reducing maternal mortality and morbidity in LMIC. Future studies should document better the effectiveness of the NMCR cycle particularly on outcomes reflecting patient centrality and on cost-effectiveness.

### Article summary: strengths and limitations of this study

- The maternal near-miss case review (NMCR) approach has been used in different settings; however, so far no systematic review has ever reported on its effectiveness. The present review fill an existing gap in evidence synthesis by reporting latest evidence on the effectiveness of NMCR cycle as a type of criterion base audit in low and middle-income countries (LMIC).
- Findings of this review are limited by the paucity of existing scientific literature: despite the NMCR approach has been utilised in many countries, such as China, India, South Africa and the WHO European Region, scientific literature reporting on the NMCR effectiveness is relatively scarce.
- Despite the above described limitations, this review collected an appreciable number of studies reporting on the impact of the NMCR cycle from different regions worldwide, including Africa, Europe and Central Asia, South East Asia, Latin America and Caribbean- and adds as a new knowledge that this approach may be effective in reducing maternal mortality, and in improving quality of maternal and newborn health care at facility level.

### Keywords

Near miss case review; quality of care; maternal health; perinatal health; low and middle income countries

### Disclosure of interests

None competing interest

### List of abbreviations

CBAs= controlled before-and after studies

CCTs= controlled clinical trials

ITSs= and intermittent time series

LMIC = low and middle-income countries

NMCR= Near miss cases review

OR= odds ratio

QoC= Quality of care

RCTs= randomised controlled trials (RCTs)

UCBAs=uncontrolled before and after studies

WHO = World Health Organization

## BACKGROUND

Ensuring adequate quality of health care is a primary objective of the World Health Organization (WHO) Global Strategy for Women's, Children's and Adolescent's Health 2016-2030 (1,2). Quality in health care is recognized by WHO as essential for the health and well-being of the population, and as a basic aspect of human rights (2,3).

Among different approaches aiming at improving quality of care in maternity services, the maternal near-miss cases review (NMCR) approach was promoted by WHO and partners since 2004 within the strategy Beyond the Numbers (4). The facility-based individual NMCR cycle is defined as a type of criterion-based audits seeking to improve maternal and perinatal health care and outcomes by the review, performed at hospital level, of the care provided to maternal near-miss cases (5). A maternal near miss case is defined as a woman who nearly died but survived a complication that occurred during pregnancy, childbirth or within six weeks after pregnancy (5).

In the last 20 years, NMCR have been promoted as an alternative way to audit case management, more acceptable for health workers than mortality audits, which have been in use for many years (4,5). In fact, in low mortality settings or at the health service level, the number of maternal deaths is usually insufficient or not representative enough to allow reliable policy guidance (4). Moreover, discussing cases of deaths may have legal implication and may be perceived as challenging by hospital staff (4). Near-miss cases occur more frequently than maternal deaths, their review can directly inform on both strengths and weakness in the process of care, and is usually perceived by staff as more easy to perform than mortality audits (5,6).

The objective of the NMCR cycle is on identifying areas amenable of improving quality of care, and finding and implementing solutions to the problems identified. Actions for improving quality of care are proposed and agreed by hospital staff, and subsequently monitored to check their implementation (5). This bottom-up approach aims at ensuring local ownership and at facilitating team-building dynamics (5). Beside reviewing clinical management the NMCR can cover other domains involved with the delivery of care, including availability of essential equipment, staffing, training, policies and organization of services (5). According to the WHO guidance (5) patients' experience of care should be collected through interviews and taken into account in developing recommendations aiming at improving quality of care.

The NMCR approach has been used in different settings (5); however, so far no systematic review has ever reported on its effectiveness. The objective of this review is to systematically evaluate and synthesise the evidence on the effectiveness of the NMCR cycle on the quality of care and on maternal and perinatal health outcomes in low and middle-income countries (LMICs).

## METHODS

### Search strategy and eligibility criteria

In conducting this review we followed the guidelines reported in the PRISMA (Preferred Reporting Items for systematic reviews and meta-analyses) (7). A protocol including detailed methods of the review was developed before starting the review.

We searched up to September 2017 the following databases: MEDLINE through Pubmed (from 1956); LILACS (no date restrictions); Global Index Medicus (no date restrictions); Science Citation Index Expanded (SCI-EXPANDED) through Web of Science (no date restrictions); Social Sciences Citation Index (SSCI) through Web of Science (no date restrictions); Cochrane library (no date restrictions); Embase through OVID (from 1996). The search strategy is reported in **Box 1**. Manual searches of reference lists were also performed. We did not apply any language restrictions.

Studies were eligible for inclusion if they reported on the effectiveness (outcome) on maternal and perinatal health care (population) of the individual NMCR cycle at facility level (intervention), in a LMIC (setting), defined as for the World Bank definition at the time of the study (8). Given the paucity of randomised controlled trials (RCTs) on the subject, we opted for including in this review also non randomized controlled clinical trials (CCTs), controlled before-and after studies (CBAs), uncontrolled before and after studies (UCBAs) and intermittent time series (ITSs). Qualitative studies were excluded. Both studies using the WHO definition of a maternal near-miss case published in year 2011 (9) or previous/locally adapted definitions, such as locally developed disease-specific definitions, were included. Only studies reporting on interventions where the full audit cycle was implemented (ie including implementation of changes) were included, while studies reporting only the descriptive findings of the case review (ie identifications of gaps in case management without developing and implementing recommendations) were not eligible. Abstracts and unpublished reports were also not eligible for inclusion.

Maternal mortality was predefined as our primary outcome. Secondary outcomes included any outcome informing on any of the six dimensions of quality of care (10), namely: efficacy (eg maternal morbidity), safety (eg adverse events), efficiency (cost), equity (eg equitable care), accessibility and timely care (eg access to care), acceptability and patient-centered care (eg patients' satisfaction). Effectiveness on the quality of care is reported according the Donabedian model of quality improvement, which differentiate in between: i) outcomes of care (eg health outcomes, costs, satisfaction), ii) process of care (eg diagnosis and treatment); iii) and

1  
2 inputs/structure (eg physical structure, staffing, equipment and supplies, training, policies and  
3 organization of care) (11).  
4  
5

## 6 7 **Data collection and analysis**

8  
9 Studies were selected for inclusion by two independent authors in two teams (VC and AE, ML and  
10 SR). Any disagreement was resolved through discussion. The full text of all eligible citations was  
11 examined in detail. Two authors (ML, SR) extracted data from included studies, using a pre-piloted  
12 data-extraction form. Disagreements were resolved by discussion between the two authors and  
13 consensus with a third author.  
14  
15

16  
17  
18 We extracted information regarding: study setting, design and duration; characteristics of the  
19 intervention; type of outcomes evaluated; effectiveness of the NMCR on the outcomes. For the  
20 study with ITS design we included in the metanalysis of maternal mortality the first and the last  
21 time point reported. Data on effectiveness were extracted as crude numbers or percentages.  
22 When meta-analysis was possible and appropriate, for each outcome factor we generated a  
23 pooled odds ratio (OR) using the Mantel-Haenszel weighting method (12). Pooled data were  
24 presented in forest plots; data that could not be meta-analyzed were presented in tables and text.  
25 We tested the null hypothesis that all studies evaluate the same true effect by the Cochran's Q  
26 test, with two-sided  $p < 0.05$  considered statistically significant.  
27  
28  
29  
30  
31  
32

33 The degree of heterogeneity between studies was assessed by visual inspection of the forest plots  
34 and I-squared (I<sup>2</sup>) statistic with its 95% confidence intervals. Heterogeneity was considered low for  
35 I<sup>2</sup> values between 25% and 50%, moderate for value between 50% and 75%, and high for values  
36 over 75% (12).  
37  
38  
39

40 The Cochrane 'Risk of bias' tool modified with the Cochrane Effective Practice and Organization of  
41 Care Group (EPOC) criteria for ITSs (12) was used to assess the risk of bias in included studies.  
42 We aimed at performing the following sensitivity analyses: i) removing the studies with high risk of  
43 bias; ii) removing studies including less than 300 cases and less than 30 events (ie cases of  
44 maternal death or perinatal death). We performed a subgroup analysis exploring the effect of  
45 NMCR in low income countries (defined as for the World Bank definition at the time of the study  
46 (8)) compared to middle income countries.  
47  
48  
49  
50  
51  
52

## 53 **RESULTS**

54  
55  
56  
57  
58  
59  
60



## Characteristics of the studies

The search yielded overall 24,822 records (**Figure 1**). Overall 17 papers (13-29) from Africa (Ghana, Ethiopia Malawi, Nigeria, Tanzania, Uganda), Europe and Central Asia (Kazakhstan, Moldova), South East Asia (Malaysia, Vietnam) and Latin America and Caribbean (Jamaica) met the inclusion criteria.

Characteristics of the study settings and design are summarized in **Table 1**. All except one study (23) were published during the last 15 years. Two papers referred to the same experience (20, 21); findings from these studies are jointly reported in the tables, and we used the most recent reference (20) to identify them. All studies were uncontrolled before and after-studies (UCBAs), describing the effectiveness of the NMCR cycle with a before and after analysis, except for two studies with ITS design (13, 22). Studies duration ranged from a minimum of 6 months (27) to a maximum of 26 months (29). Thirteen studies were held in low-income countries (13-15,17,19,22-27,28,29), two in upper middle-income countries (16,20), and one in a lower middle-income country (18). Ten studies were held in an urban setting (13-17,19,20,25,28,29), three in a rural setting (22,24,27), and three in a mixed setting (18,23,26). One study was multi-centered (Ghana and Jamaica) (29). Among the 16 experiences reported, nine were of large size: three studies in Malawi enrolled respectively 73, 29 and 13 facilities of different level and type (22,26,27), while another study in Malawi was conducted in one referral hospital plus several (number not further specified) health centres (24); a study in Ethiopia involved 10 public hospitals (17); studies in Kazakhstan, Vietnam, Ghana, Jamaica and Moldova involved six, five, four and three hospitals respectively (20,23,29,18). The remaining seven studies took place in one teaching/tertiary level care hospital each.

Characteristics of the intervention are summarized in **Table 2**. In eight studies cases were audited prospectively (15,17,18,20,22,24-26); in another five studies audits were conducted retrospectively in a first phase then prospectively in the second phase (16,19,23,28,29); in three studies cases were audited only retrospectively (12,13,27). While in all cases the internal staff within the facility was involved in developing the recommendations, studies differed by who performed the case reviews: in most experiences audits were conducted by internal staff within the facility/ies, with the exception of four cases where a study investigator/physician audited the cases against pre-defined criteria and later presented it to hospital staff (13,19,25,29) and two cases where this information was not specified (15,16). Type of obstetric complications selected for audit included: severe pre-eclampsia/eclampsia (13,16,19,22,23,25-29), post-partum haemorrhage (13,20,22,23,25-27,29), obstructed labour (14,15,23,26,27,29), uterine rupture (24,25,29), infections (23,25,27), complications of abortion (27). Five studies focused on one complication only (14-16,24,28) while

1  
2 in all other studies more than one condition was audited. In three studies cases of maternal  
3 mortality were audited together with cases of near-miss (17,22,26). The criteria for case selection  
4 was “all cases occurring in the study period”, except in one experience in Malawi where cases of  
5 particular educational interest were selected (24), and a study in Moldova were, despite no pre-  
6 defined criteria, it was observed that cases “more likely to lead to praises for the maternity team”  
7 were selected (18). Number of total cases audited in each study ranged widely, from 30 cases (18)  
8 to 2568 cases (17).

9  
10  
11  
12  
13  
14 Only in four experiences women were interviewed (14,15,18,20), but in one of them this was  
15 explicitly merely for recording bureaucratic details (15), rather than for the purpose of collecting  
16 women views and perspectives on quality of care received. Most studies associated to the audits  
17 additional interventions, such as development/dissemination of guidelines, training, definitions of  
18 standards, advocacy among key stakeholders. In one study, information for patients related to the  
19 NMCR was also developed (16).

20  
21  
22  
23  
24 As reported in **Table 3**, types of outcomes evaluated in the studies reported mostly on two  
25 dimensions of quality of care (10): effectiveness and accessibility and timely care. Outcomes  
26 related to the other dimension of quality of care, such as patient centrality and acceptability (eg  
27 patient satisfaction), efficiency and equity, safety (eg rate of adverse events, incident reporting)  
28 were not explored, with the exception of one study in Kazakhstan reporting on improved patients  
29 satisfaction (20) and one in Moldova reporting improved attitude towards patients (18).

### 30 31 32 33 34 35 **Effectiveness of the NMCR cycle**

#### 36 37 38 *Effectiveness on health outcomes*

39  
40  
41 In a meta-analysis of eight studies from seven countries in Africa, Latin America and Asia maternal  
42 mortality measured before and after the implementation of the NMCR cycle significantly decreased  
43 (OR 0.77, 95%CI 0.61 to 0.98, 5,5573,043 women, **Figure 2**), with low heterogeneity between  
44 studies ( $I^2= 39\%$ ). An additional study from Uganda reported to have observed a reduction in  
45 maternal mortality, but quantitative data were not made explicit (15).

46  
47  
48 Three out of six studies reported a statistically significant reduction in the incidence of the following  
49 preventable obstetric complications: uterine rupture, major post-partum haemorrhage, and  
50 maternal sepsis (15,22,24, **Table 4**).

51  
52  
53  
54 Newborn outcomes were overall poorly reported. Of five studies documenting perinatal mortality,  
55 fours could be included in the meta-analysis, showing no significant differences in perinatal deaths

1  
2 in the before and after period (OR 0.92, 95%CI 0.65, 1.30, **Figure 3**) with low heterogeneity  
3 between studies ( $I^2= 40\%$ ). The fifth study (14), conducted in Uganda, reported a significant  
4 reduction in the incidence of a combined outcome including perinatal severe morbidities, deaths  
5 and stillbirths (**Table 4**). One study in reported on number of newborns admitted to ICU, without  
6 statistical difference in the before and after NCMR period (15). Another single study reported on  
7 Apgar score birth weight, without changes in the before and after period (16).  
8 One study reported increased patient satisfaction after the implementation of the NMRC cycle (20).  
9  
10  
11  
12

### 13 *Effectiveness on process outcomes*

14  
15  
16  
17 The effectiveness of the NMCR on the process of care is synthesized in **Table 5**. Ten studies  
18 reported on the process of care when measured quantitatively against pre-defined standards and  
19 all showed some significant improvements (13-16,19,23,25,27,28,29). Six studies reported other  
20 findings, such as improved case documentation, referral, use of partograph, monitoring and  
21 teamwork (14,17,18,20,22,26).  
22  
23  
24  
25

### 26 *Effectiveness on structure outcomes*

27  
28  
29 Effectiveness on the structure is detailed in **Table 6**. All studies reported some improvements in  
30 one or more domains. Overall most frequent changes relate to: purchasing of essential equipment  
31 and supplies; training, monitoring and supervision; policies and organization of care (including  
32 reorganisation of services, standardisation of case management through guidelines, checklists and  
33 monitoring forms, rational use of staff).  
34  
35  
36  
37

### 38 *Risk of bias and other analyses*

39  
40  
41 All studies were rated as a high risk of bias based on the Cochrane and EPOC criteria (**Table S1**),  
42 mostly due to the study design (NCBA or ITS studies).  
43

44 The sensitivity analysis showed that when studies with a very small sample size were excluded,  
45 the effect of the NMCR on maternal mortality become stronger than when all studies were included  
46 (OR 0.71, 95%CI 0.55 to 0.90, three studies  $I^2=86\%$  **Figure S1**). The effect of NMCR on perinatal  
47 mortality did not significantly changed in the sensitivity analysis (**Figure S2**).  
48  
49

50 In the subgroup analysis, the effect of NMCR on maternal mortality was statistically significant in  
51 low income countries (R 0.77, 95%CI 0.60 to 0.98, 7 studies), while only one small study could be  
52 included in the category middle income countries, without statistical significance (**Figure S3**). The  
53 effect of NMCR on perinatal mortality was not affected by subgroup analysis (**Figure S4**).  
54  
55

56 Funnel plots did not suggest publication bias (**Figure S5 and S6**).  
57  
58  
59  
60

## DISCUSSION

This review suggests that the facility based individual maternal NMCR cycle may be an effective strategy for reducing maternal mortality in high burden countries, and for improving overall quality of maternal care in LMIC. Results of a pooled analysis of findings from eight studies in seven countries showed that the NMCR cycle significantly reduced maternal mortality (OR 0.77, 95%CI 0.61 to 0.98, Figure 2), with low heterogeneity of results ( $I^2=39\%$ ). Out of ten studies reporting on the process of care when measured against pre-defined standards all showed some statistically significant improvement. Additionally, in all studies the implementation of the NMCR cycle resulted in some amelioration in the structure of the hospital, such as an increased availability of essential equipment and supplies, training, monitoring and supervision, and the implementation of new policies and better organization of services. Three out of six studies reported a significant reduction in the incidence of preventable obstetric complications such as uterine rupture, major post-partum haemorrhage, and maternal sepsis.

Previous systematic reviews had observed a benefit of criterion-base audits in improving the quality of obstetric care (30-32). However, a review on the effectiveness of criterion-base audits in LMIC published some years ago concluded that despite criterion-base audits being increasingly used, few studies had reported on their effectiveness (33). The present review retrieved all latest evidence on the effectiveness of NMCR cycle as a type of criterion base audit, synthesized studies from LMIC in different geographical regions- including Africa, Europe and Central Asia, South East Asia, Latin America and Caribbean- and adds as a new knowledge that this approach may be effective in reducing maternal mortality and in improving quality of health care provided.

Findings of this review are limited by the paucity of existing scientific literature: through the study screening it become evident that the NMCR approach has been utilized in much more countries than what could be included in this reviews, such as China (34), India (35), South Africa (36), and the WHO European Region (37-41), but scientific literature reporting on the NMCR effectiveness in these countries could not be retrieved. Secondly, all included studies had an UCBA or ITS design, thus being exposed to a high risk of bias (although most studies checked for potential confounding factors, such as the case mix in the before and after phase). Most studies had low sample size which did not allow for detecting a statistically significant difference in rare outcomes such as maternal or perinatal mortality (18,20). Despite these limitations, this review collected an appreciable number of studies reporting on the impact of the NMCR cycle from different regions worldwide, and in most experiences significant gains were observed. In some cases, quality of care and/or maternal mortality could not significantly change because attainment of standards of

1 care were already at a good level at the baseline (13,23,27). Ideally, it will be advisable to perform  
2 large multicenter RCTs to properly document the effectiveness of NMCR. However, in practice  
3 conducting RCTs on criterion based audit alone may be challenging, and may even be perceived  
4 as unethical, if no appropriate comparison is chosen. This is because in current practice criterion  
5 based audits are already one of the recommended strategies to improve quality of care promoted  
6 by many agencies and bodies, such as the National Institute for Clinical Excellence (NICE) (42).  
7 Notably, the review of “near-miss” cases is already recommended by WHO as a “key action to  
8 eliminate avoidable maternal and perinatal mortality and morbidity and improve the quality of care”  
9 (43) and as such it is already implemented in several countries.  
10  
11  
12  
13  
14  
15  
16

17 The audit of maternal near miss cases is an approach utilised also in several high-income settings:  
18 UK has a well-established programme of confidential enquiries into maternal deaths and a national  
19 system for research on maternal near-miss-the UK Obstetric Surveillance System (UKOSS)  
20 (44,45); New Zealand established a national system for severe maternal morbidity review (46);  
21 several countries within the International Network of Obstetric Survey Systems (INOSS) are  
22 collecting data on severe maternal morbidities for study purposes (47), while other countries such  
23 as Italy (ITOSS) are starting implementing near-miss audits (48,49). Despite there are some  
24 differences in the type of interventions applied (eg not all of these approaches are facility based)  
25 still the existence of these large networks on maternal near miss case reviews and the amount of  
26 resources devoted to them somehow testify the importance recognized in reviewing near miss  
27 cases.  
28  
29  
30  
31  
32  
33  
34

35 In the future, rather than investing resources in exploring whether near miss audits or criterion  
36 base audits in general are overall effective, it will be more interesting to explore which  
37 characteristics make them effective and sustainable. Available literature does not allow for directly  
38 comparing the effectiveness of different methodologies on how practically performing the audits,  
39 but at least it does provide some useful starting point for discussion and for future research. First,  
40 with regards to the number of cases audited, this varied largely in the included studies from a  
41 minimum of less than 10 cases per year (18,20) to a maximum of several hundred cases in few  
42 months (14,29), with a third approach consisting in performing a large retrospective review of past  
43 cases at the baseline, and then collecting fewer new cases prospectively. When many cases were  
44 reviewed, this allowed for an in depth description of the gaps in care. However, the analysis of a  
45 large number of cases does not necessarily ensure the development of good recommendations  
46 for quality improvement, neither their implementation. Additionally, the sustainability of auditing on  
47 a large number of cases, outside a research setting, is questionable. Studies included in this  
48 review suggest that even the periodic review of few cases may help identifying gaps in routine  
49 care, and developing SMART recommendations (ie Specific, Measurable, Achievable, Realistic,  
50  
51  
52  
53  
54  
55  
56  
57  
58  
59  
60

1  
2 Time-bound (50)), and improving quality of care significantly (18,20).  
3  
4

5 Second, the study screening revealed that many audit experiences focused on the description of  
6 the findings of the audits, while only a minority get to the point of developing recommendations for  
7 improving quality of care. Studies from both the European and the African region (18,51,52)  
8 confirm this finding highlighting that the second part of the audit cycle (ie developing  
9 recommendations, implementing them, checking on progress) is in general more problematic and  
10 usually less well conducted compared to the first part of the audit cycle. The attitude of openly  
11 discussing cases within a multidisciplinary team and agreeing solutions was described as  
12 challenging in different settings, especially for mid-level staff (midwives, nurses) who may not used  
13 at discussing their views together with doctors and managers (18,20). Hospital staff, managers  
14 included, often do not receive any formal training in quality improvement methods and in how  
15 correctly performing an audit cycle. Studies included in this review revealed that most experiences  
16 of implementation of NMCR cycle were externally supported, either by the WHO, academia, and/or  
17 other development partners (15,18,20-24,26-28). The need for external support, and for  
18 establishing a functional quality assurance mechanism are recognised by WHO crucial for ensuring  
19 an effective NMCR implementation (5).  
20  
21  
22  
23  
24  
25  
26  
27  
28

29 Third, in regards to who performed the review, in most cases these were performed by a hospital  
30 multidisciplinary team, while in few cases (18,10,25,29) a single person (clinician or researcher)  
31 performed the audit and later presented results to hospital staff. Although having a single person  
32 appointed to perform the case-review may increase feasibility, this actually largely reduces  
33 ownership of the process, together with minimizing occasions for discussion and team building  
34 among staff. Studies noted that involvement of all health care providers in the audit process  
35 promoted successful implementation, ownership and sustainability of the process (14,20,28). The  
36 involvement of mid level staff such as nurses and midwives was reported to result in improved staff  
37 autonomy and team work (14,21,27). Currently the WHO approach (5) recommends the NMCR to  
38 be performed by the staff who managed the cases, including nurses, midwives, and any other staff  
39 directly or indirectly involved in case management. In regards to the participation of the senior  
40 management, different studies observed that this promoted the implementation of  
41 recommendations that required allocation of resources and changes in policies and organisation of  
42 care (26,28).  
43  
44  
45  
46  
47  
48  
49  
50

51 Forth, in relation to the patient's experience of care, this was collected for auditing purposes only in  
52 very few of the existing studies, and yet not fully taken into account. For example a study  
53 conducted in Moldova (18) revealed that the language used to interview women was rather  
54 medical and no account of the woman's feelings was actually reported. All women appeared  
55  
56  
57  
58  
59  
60

1  
2 satisfied with the care provided and praised the staff, very few women made suggestions for  
3 improvements, and very few recommendations developed from the audit related to women's views  
4 (18). Possible explanations for these findings according to authors included: women's low  
5 expectations, lack of women's empowerment, women's reluctance to discuss dissatisfaction and  
6 staff 's actions openly, interviewers' lack of capacity and willingness, and paternalists attitude  
7 towards patients (18). Authors of the study concluded that there was a need for a shift in mentality,  
8 along with a need for providing better training for interviewers (18). In the last years, WHO has  
9 given increasing importance to patient's experience of care (1). Listening to women's views may  
10 provide important information, as testified by studies in Brazil, Rwanda and UK (53-55) and by a  
11 study in Iran where women's views were successfully used to improve quality of care (56).  
12 Currently WHO recommends to always interview women and their families and to use their inputs  
13 for improving care (5).  
14  
15  
16  
17  
18  
19  
20

21 Finally, as pointed out by authors of the included studies, interventions aiming at improving quality  
22 of care without strengthening the health systems and improving community awareness may have  
23 minimal success (15,22). A study in Malawi reported that availability of essential supplies, such as  
24 blood for transfusions, remained low even after the NMCR due to health system failures and this  
25 clearly was a barrier for improving case management (22). Qualitative findings collected through  
26 focus group in a study in Uganda (15) pointed out among factors that may have hampered the  
27 effectiveness of NMCR health facility factors such as: stock-out of essential supplies, shortage of  
28 human resources, lack of task allocation, inadequate supervision. Importantly, in most studies, the  
29 number of staff and available resources remained stable in the before and after phase, while, as a  
30 result of the audit, there was a reorganization of staff activities, such as better specification of roles  
31 and responsibilities, task shifting, and improved communication (14,16,17,20,28).  
32  
33  
34  
35  
36  
37  
38

39 Cost of the NMCR approach in improving health outcomes and quality of care was not formally  
40 evaluated in the retrieved studies. However, several papers stated that the NMCR was an  
41 inexpensive and simple intervention, requiring little technology (24,26-28). A study involving 12  
42 health centres in Malawi reported that each audit meeting cost about 150 US \$, including foods  
43 and transport of participants to the District Hospital (27). Another study in Uganda stated that "the  
44 audit process had challenged the assumption that all quality improvements need to be externally  
45 provided and are expensive" (28). These findings are in line with a systematic review of barriers  
46 and facilitators for effective NMCR implementation, reporting that a relatively low budget is needed  
47 to facilitate activities (37). In some experiences, the NMCR improved use or availability of existing  
48 economic resources: in Malawi, it "promoted a wiser allocation of resources for maternity care at  
49 the district level" (27); in Uganda a fundraising committee was established to raise funds for the  
50 drugs and equipment needed according to the recommendations (28).  
51  
52  
53  
54  
55  
56  
57

## CONCLUSIONS

### *Implication for policy and research*

Among other strategies to reduce maternal mortality and morbidity and for improving the quality of maternal and perinatal care, policy makers should consider the implementation of the maternal NMCR cycle approach.

Researchers should aim at generating more evidence on how effectively implementing the NMCR cycle, how improving its impact on newborn outcomes and on outcomes reflecting patients' centrality, such as patients' satisfaction and/or perception of quality of care received, together with documenting the cost effectiveness of the NMCR approach.

### **Funding**

This review was funded by a grant from the GREAT Network, Canadian Institutes of Health Research, St. Michael's Hospital, Toronto.

### **Conflict of interest**

None

### **Role of authors**

ML conceived the papers, screened the study, extracted data, drafted the paper and finalised the paper. SR, VC, AE screened the study, extracted data and revised the first draft.

### **Data Sharing statement**

All details of the analyses conducted are provided within the manuscript



## REFERENCES

1. Tunçalp O, Were WM, MacLennan C, Oladapo OT, Gülmezoglu AM, Bahl R, Daelmans B, Mathai M, Say L, Kristensen F, Temmerman M, Bustreo F. Quality of care for pregnant women and newborns—the WHO vision. *BJOG*. 2015 Jul;122(8):1045-9.
2. World Health Organization. Global Strategy for Women's, Children's and Adolescent's Health 2016-2030 Available at <http://www.who.int/life-course/partners/global-strategy/global-strategy-2016-2030/en/> (accessed Sept 15, 2016)
3. World Health Organization (WHO). The prevention and elimination of disrespect and abuse during facility-based childbirth. World Health Organization, Geneva, 2014. Available at [http://apps.who.int/iris/bitstream/10665/134588/1/WHO\\_RHR\\_14.23\\_eng.pdf?ua=1&ua=1](http://apps.who.int/iris/bitstream/10665/134588/1/WHO_RHR_14.23_eng.pdf?ua=1&ua=1) (accessed Feb 8, 2016)
4. World Health Organization. Beyond the numbers: Reviewing maternal deaths and complications to make pregnancy safer. World Health Organization, Geneva, 2004. Available at <http://whqlibdoc.who.int/publications/2004/9241591838.pdf?ua=1> (accessed 29, 2016, 2016)
5. World Health Organization. Regional Office for Europe. Conducting a maternal near-miss case review cycle at the hospital level” manual with practical tools. Available at <http://www.euro.who.int/en/health-topics/Life-stages/maternal-and-newborn-health/publications/2016/conducting-a-maternal-near-miss-case-review-cycle-at-hospital-level-2016> (accessed November 29, 2016)
6. Tunçalp O, Hindin MJ, Souza JP, Chou D, Say L. The prevalence of maternal near miss: a systematic review. *BJOG*. 2012 May;119(6):653-61
7. Liberati A, Altman DG, Tetzlaff J, Mulrow C, Gotzsche PC, Ioannidis JP et al. (2009) The PRISMA statement for reporting systematic reviews and meta-analyses of studies that evaluate health care interventions: explanation and elaboration. *PLoS Med* 6: e1000100.
8. The World Bank, Country and Lending Groups. (2014) Historical classification. Available: <https://datahelpdesk.worldbank.org/knowledgebase/articles/906519>(Accessed 2 November 2016).
9. World Health Organization 2011. Evaluating the quality of care for severe pregnancy complications: the WHO near-miss approach for maternal health. World Health Organization, Geneva, 2011
10. Institute of Medicine. Crossing the Quality Chasm. Washington, DC: National Academy Press, 2001. Available at <http://www.nap.edu/openbook.php?isbn=0309072808>. Accessed on 7th November 2016
11. Donabedian A. The quality of care: how can it be assessed? *JAMA* 1988; 260(12): 1743-1748.
12. Higgins JPT, Green S (editors). *Cochrane Handbook for Systematic Reviews of Interventions* Version 5.1.0 [updated March 2011]. The Cochrane Collaboration, 2011. Available from <http://handbook.cochrane.org>. Accessed on 7th November 2016
13. Lumala A, Sekweyama P, Abaasa A, Lwanga H, Byaruhanga R. Assessment of quality of care among in-patients with postpartum haemorrhage and severe pre-eclampsia at st. Francis hospital nsambya: a criteria-based audit. *BMC Pregnancy Childbirth*. 2017 Jan 13;17(1):29. doi: 10.1186/s12884-016-1219-y.

- 1  
2 14. Mgaya AH, Kidanto HL, Nystrom L, Essén B. Improving Standards of Care in Obstructed Labour: A  
3 Criteria-Based Audit at a Referral Hospital in a Low-Resource Setting in Tanzania. *PLoS One*. 2016  
4 Nov 28;11(11):e0166619. doi: 10.1371/journal.pone.0166619.
- 5  
6 15. Kayiga H, Ajeani J, Kiondo P, Kaye DK. Improving the quality of obstetric care for women with  
7 obstructed labour in the national referral hospital in Uganda: lessons learnt from criteria based audit.  
8 *BMC Pregnancy Childbirth*. 2016 Jul 11;16(1):152.
- 9  
10 16. Mohd Azri MS, Edahayati AT, Kunasegaran K. Audit on management of eclampsia at Sultan Abdul  
11 Halim Hospital. *Med J Malaysia*. 2015 Jun;70(3):142-7.
- 12  
13 17. Gebrehiwot Y, Tewolde BT. Improving maternity care in Ethiopia through facility based review of  
14 maternal deaths and near misses. *Int J Gynaecol Obstet*. 2014 Oct;127 Suppl 1:S29-34.
- 15  
16 18. Baltag V, Filippi V, Bacci A. Putting theory into practice: the introduction of obstetric near-miss case  
17 reviews in the Republic of Moldova. *Int J Qual Health Care*. 2012 Apr;24(2):182-8
- 18  
19 19. Kidanto HL, Wangwe P, Kilewo CD, Nystrom L, Lindmark G. Improved quality of management of  
20 eclampsia patients through criteria based audit at Muhimbili National Hospital, Dar es Salaam,  
21 Tanzania. Bridging the quality gap. *BMC Pregnancy Childbirth*. 2012 Nov 21;12:134.
- 22  
23 20. Sukhanberdiyev K, Ayazbekov A, Issina A, Abuova G, Hodorocea S, Bacci A. Initial experience of  
24 Near Miss Case Review: improving the management of haemorrhage. *Entre Nous* 2011: 74; 18-19.
- 25  
26 21. Hodorocea S. Piloting near miss case reviews in Kazakhstan: improving quality of maternal care.  
27 *Entre Nous* 2010: 70; 28-29.
- 28  
29 22. van den Akker T, van Rhenen J, Mwangomba B, Lommerse K, Vinkhumbo S, van Roosmalen J.  
30 Reduction of severe acute maternal morbidity and maternal mortality in Thyolo District, Malawi: the  
31 impact of obstetric audit. *PLoS One*. 2011;6(6):e20776. doi: 10.1371/journal.pone.0020776. Epub  
32 2011 Jun 3.
- 33  
34 23. Bailey PE, Binh HT, Bang HT. Promoting accountability in obstetric care: use of criteria-based audit  
35 in Viet Nam. *Glob Public Health*. 2010;5(1):62-74.
- 36  
37 24. van den Akker T, Mwangomba B, Irlam J, van Roosmalen J. Using audits to reduce the incidence of  
38 uterine rupture in a Malawian district hospital. *Int J Gynaecol Obstet*. 2009 Dec;107(3):289-94. doi:  
39 10.1016/j.ijgo.2009.09.005. Epub 2009 Oct 28.
- 40  
41 25. Hunyinbo KI, Fawole AO, Sotiloye OS, Otolurin EO. Evaluation of criteria-based clinical audit in  
42 improving quality of obstetric care in a developing country hospital. *Afr J Reprod Health*. 2008  
43 Dec;12(3):59-70
- 44  
45 26. Kongnyuy EJ, Leigh B, van den Broek N. Effect of audit and feedback on the availability, utilisation  
46 and quality of emergency obstetric care in three districts in Malawi. *Women Birth*. 2008  
47 Dec;21(4):149-55.
- 48  
49 27. Kongnyuy EJ, Mlava G, van den Broek N. Criteria-based audit to improve a district referral system in  
50 Malawi: a pilot study. *BMC Health Serv Res*. 2008 Sep 22;8:190.
- 51  
52 28. Weeks AD, Alia G, Ononge S, Otolurin EO, Mirembe FM. A criteria-based audit of the management  
53 of severe pre-eclampsia in Kampala, Uganda. *Int J Gynaecol Obstet*. 2005 Dec;91(3):292-7;  
54 discussion 283-4.
- 55  
56  
57  
58  
59  
60

- 1 29. Wagaarachchi PT, Graham WJ, Penney GC, McCaw-Binns A, Yeboah Antwi K, Hall MH. Holding up  
2 a mirror: changing obstetric practice through criterion-based clinical audit in developing countries. *Int*  
3 *J Gynaecol Obstet.* 2001 Aug;74(2):119-30
- 4 30. Ivers N, Jamtvedt G, Flottorp S, Young JM, Odgaard-Jensen J, French SD, O'Brien MA, Johansen M,  
5 Grimshaw J, Oxman AD. Audit and feedback: effects on professional practice and healthcare  
6 outcomes. *Cochrane Database Syst Rev.* 2012 Jun 13;(6):CD000259.
- 7 31. Pantoja T, Opiyo N, Lewin S, Paulsen E, Ciapponi A, Wiysonge CS, Herrera CA, Rada G, Peñaloza  
8 B, Dudley L, Gagnon MP, Garcia Marti S, Oxman AD. Implementation strategies for health systems  
9 in low-income countries: an overview of systematic reviews. *Cochrane Database Syst Rev.* 2017  
10 Sep 12;9:CD011086. doi: 10.1002/14651858.CD011086.pub2.
- 11 32. Kongnyuy EJ, Uthman OA. Use of criterion-based clinical audit to improve the quality of obstetric  
12 care: A systematic review. *Acta Obstet Gynecol Scand.*2009;88(8):873-81
- 13 33. Pirkle CM, Dumont A, Zunzunegui MV. Criterion-based clinical audit to assess quality of obstetrical  
14 care in low- and middle-income countries: a systematic review. *Int J Qual Health Care.* 2011  
15 Aug;23(4):456-63.
- 16 34. Wu J, Song B, Zheng R. Evaluating the effectiveness of maternal near-miss audit in China.  
17 *International Journal of Gynecology and Obstetrics 2015 Conference: 21st FIGO World Congress of*  
18 *Gynecology and Obstetrics.* Vancouver, BC Canada. Conference Start: 20151004. Conference End:  
19 20151009. Conference Publication: (var.pagings). 131
- 20 35. Lewis G. Emerging lessons from the FIGO LOGIC initiative on maternal death and near-miss  
21 reviews. *Int J Gynaecol Obstet.* 2014 Oct;127 Suppl 1:S17-20.
- 22 36. Heitkamp, A.; Vollmer, L.; Van Den Akker, T.; Gebhardt, S.; Van Roosmalen, J.; Theron, G. Severe  
23 acute maternal morbidity (SAMM) in metro east, western cape, South Africa: "Every human being  
24 has the right to live, every child needs a mother, mothers should not die because of their  
25 pregnancy." How can we improve the quality of care in the existing health system? *International*  
26 *Journal of Gynecology and Obstetrics 2015. Conference: 21st FIGO World Congress of Gynecology*  
27 *and Obstetrics.* Vancouver, BC Canada. Conference Start: 20151004. Conference End: 20151009.  
28 Conference Publication: (var.pagings). 131
- 29 37. Lazzarini M, Ciuch M, Covi B, Rusconi S, Bacci A. Facilitators and barriers to the effective  
30 implementation of the maternal near-miss case reviews in low and middle income countries:  
31 systematic review (submitted for publication)
- 32 38. Bacci A, Lewis G, Baltag V, Betrán AP. The introduction of confidential enquiries into maternal  
33 deaths and near-miss case reviews in the WHO European Region. *Reprod Health Matters.* 2007  
34 Nov;15(30):145-52.
- 35 39. World Health Organization. Regional Office for Europe. Multi-Country review meeting on maternal  
36 mortality and morbidity audit "Beyond the Numbers", Report of a WHO meeting, Charvak,  
37 Uzbekistan 14–17 June 2010. Copenhagen, WHO Regional Office for Europe, 2010. Available at  
38 [http://www.euro.who.int/en/health-topics/Life-stages/maternal-and-newborn-](http://www.euro.who.int/en/health-topics/Life-stages/maternal-and-newborn-health/publications/2010/multi-country-review-meeting-on-maternal-mortality-and-morbidity-audit-beyond-the-numbers,-report-of-a-who-meeting,-charvak,-uzbekistan-1417-june-2010)  
39 [health/publications/2010/multi-country-review-meeting-on-maternal-mortality-and-morbidity-audit-](http://www.euro.who.int/en/health-topics/Life-stages/maternal-and-newborn-health/publications/2010/multi-country-review-meeting-on-maternal-mortality-and-morbidity-audit-beyond-the-numbers,-report-of-a-who-meeting,-charvak,-uzbekistan-1417-june-2010)  
40 [beyond-the-numbers,-report-of-a-who-meeting,-charvak,-uzbekistan-1417-june-2010](http://www.euro.who.int/en/health-topics/Life-stages/maternal-and-newborn-health/publications/2010/multi-country-review-meeting-on-maternal-mortality-and-morbidity-audit-beyond-the-numbers,-report-of-a-who-meeting,-charvak,-uzbekistan-1417-june-2010) (accessed sept  
41 8, 2017).

- 1  
2  
3  
4  
5  
6  
7  
8  
9  
10  
11  
12  
13  
14  
15  
16  
17  
18  
19  
20  
21  
22  
23  
24  
25  
26  
27  
28  
29  
30  
31  
32  
33  
34  
35  
36  
37  
38  
39  
40  
41  
42  
43  
44  
45  
46  
47  
48  
49  
50  
51  
52  
53  
54  
55  
56  
57  
58  
59  
60
40. World Health Organization. Regional Office for Europe. The impact of implementation of 'Beyond the numbers' approach in improving maternal and perinatal health. 29-30 April 2014, Bishkek, Kyrgyzstan. Copenhagen, WHO Regional Office for Europe, 2014. Available at <http://www.euro.who.int/en/media-centre/events/events/2014/04/the-impact-of-implementation-of-beyond-the-numbers-approach-in-improving-maternal-and-perinatal-health> (accessed Sep 8, 2017).
41. WHO Regional Office for Europe Making Pregnancy Safer in Uzbekistan. Maternal mortality and morbidity audit Activities Report 2002-2008. Available at [http://www.euro.who.int/\\_data/assets/pdf\\_file/0004/98797/MPS\\_UZB.pdf](http://www.euro.who.int/_data/assets/pdf_file/0004/98797/MPS_UZB.pdf) (accessed Sept 8, 2017)
42. National Institute for Clinical Excellence (NICE). Principles for best practice in clinical audit. Abingdon, Berks: Radcliffe Medical Press; 2002 ([http://www.uhbristol.nhs.uk/files/nhs-ubht/best\\_practice\\_clinical\\_audit.pdf](http://www.uhbristol.nhs.uk/files/nhs-ubht/best_practice_clinical_audit.pdf), (accessed Sept 22, 2017)
43. World Health Organization Regional Office for Europe. Action plan for sexual and reproductive health: towards achieving the 2030 Agenda for Sustainable Development in Europe – leaving no one behind. Copenhagen: World Health Organization Regional Office for Europe; 2016. Available at [http://www.euro.who.int/\\_data/assets/pdf\\_file/0018/314532/66wd13e\\_SRHActionPlan\\_160524.pdf](http://www.euro.who.int/_data/assets/pdf_file/0018/314532/66wd13e_SRHActionPlan_160524.pdf) (accessed Sept 22, 2017)
44. Knight M, Lewis G, Acosta CD, Kurinczuk JJ. Maternal near-miss case reviews: the UK approach. BJOG. 2014 Sep;121 Suppl 4:112-6.
45. Knight M, Acosta C, Brocklehurst P, Cheshire A, Fitzpatrick K, Hinton L, Jokinen M, Kemp B, Kurinczuk JJ, Lewis G, Lindquist A, Locock L, Nair M, Patel N, Quigley M, Ridge D, Rivero-Arias O, Sellers S, Shah A; on behalf of the UKNeS coapplicant group. Beyond maternal death: improving the quality of maternal care through national studies of 'near-miss' maternal morbidity. Southampton (UK):NIHR Journals Library; 2016 Jun.
46. MacDonald EJ, Geller SE, Lawton B. Establishment of a national severe maternal morbidity preventability review in New Zealand. Int J Gynaecol Obstet. 2016 Oct;135(1):120-3.
47. Knight M; INOSS. The International Network of Obstetric Survey Systems (INOSS): benefits of multi-country studies of severe and uncommon maternal morbidities. Acta Obstet Gynecol Scand. 2014 Feb;93(2):127-31.
48. Donati S, Maraschini A, Buoncristinao M, Bucciarelli M, Marani A. Grave morbosità materna da emorragia del post partum: aspetti metodologici del progetto coordinato dall'Italia Obstetrics Surveillance System. Rapporto Osservasalute 2014. Stato di salute e qualità dell'assistenza nelle regioni italiane. Milano: Prex, 2014. p. 260-1.
49. Donati S, Maraschini A, Buoncristiano M, Lega I, Bucciarelli M, Andreozzi S, Gruppo di lavoro ISS-Regioni. Attività della sorveglianza ostetrica: l'Istituto Superiore di Sanità-Regioni per la gestione della grave morbosità materna da emorragia del post partum. Rapporto Osservasalute 2015. Stato di salute e qualità dell'assistenza nelle regioni italiane. Milano: Prex, 2016. p. 264-6
50. Doran, G. T. (1981). "There's a S.M.A.R.T. way to write management's goals and objectives". Management Review (AMA FORUM) 70 (11): 35–36
51. Borchert M, Goufodji S, Alihonou E, Delvaux T, Saizonou J, Kanhonou L, Filippi V. Can hospital audit teams identify case management problems, analyse their causes, identify and implement

- 1  
2 improvements? A cross-sectional process evaluation of obstetric near-miss case reviews in Benin.  
3 BMC Pregnancy Childbirth. 2012 Oct 11;12:109.  
4  
5 52. Bacci A, Hodorogea S, Khachatryan H, Babojonova S, Irse S, Jansone M, Dondiuc M, Matarazde  
6 G, Lazdane G, Lazzerini M. Assessment of the quality of the facility based individual near miss case  
7 reviews in the WHO European Region: findings from Armenia, Georgia, Latvia, Republic of Moldova,  
8 Uzbekistan (submitted for publication)  
9  
10 53. Aguiar Cde A, Tanaka AC. [Collective memories of women who have experienced maternal near  
11 miss: health needs and human rights]. Cad Saude Publica. 2016 Sep19;32(9):e00161215.  
12  
13 54. Pãfs J, Musafili A, Binder-Finnema P, Klingberg-Allvin M, Rulisa S, Essén B. Beyond the numbers of  
14 maternal near-miss in Rwanda - a qualitative study on women's perspectives on access and  
15 experiences of care in early and late stage of pregnancy. BMC Pregnancy Childbirth. 2016 Sep  
16 2;16:257.  
17  
18 55. Hinton L, Locock L, Knight M. Experiences of the quality of care of women with near-miss maternal  
19 morbidities in the UK. BJOG. 2014 Sep;121 Suppl 4:20-3  
20  
21 56. Aghlmand S, Akbari F, Lameei A, Mohammad K, Small R, Arab M. Developing evidence-based  
22 maternity care in Iran: a quality improvement study. BMC Pregnancy Childbirth. 2008 Jun 13;8:20.  
23  
24 57. Dumont A, Fournier P, Abrahamowicz M, Traoré M, Haddad S, Fraser WD; QUARITE research  
25 group. Quality of care, risk management, and technology in obstetrics to reduce hospital-based  
26 maternal mortality in Senegal and Mali (QUARITE): a cluster-randomised trial. Lancet. 2013 Jul  
27 13;382(9887):146-57.  
28  
29  
30  
31  
32  
33  
34  
35  
36  
37  
38  
39  
40  
41  
42  
43  
44  
45  
46  
47  
48  
49  
50  
51  
52  
53  
54  
55  
56  
57  
58  
59  
60

**Table 1. Study settings, designs and duration**

| Author                                                            | Design ° | Duration  | Years     | Country    | WB classification * | Setting | N Hospital                              | Hospital type involved §                                                              |
|-------------------------------------------------------------------|----------|-----------|-----------|------------|---------------------|---------|-----------------------------------------|---------------------------------------------------------------------------------------|
| Lumala 2017 <sup>13</sup>                                         | ITS      | 10 months | 2014-2015 | Uganda     | L                   | Urban   | 1                                       | tertiary specialist hospital, Catholic funded private non profit                      |
| Mgaya 2017 <sup>14</sup>                                          | NCBA     | 25 months | 2013-2015 | Tanzania   | L                   | Urban   | 1                                       | tertiary specialist hospital                                                          |
| Kayiga 2016 <sup>15</sup>                                         | NCBA     | 7 months  | 2013      | Uganda     | L                   | Urban   | 1                                       | tertiary specialist hospital                                                          |
| Mohd Azri 2015 <sup>16</sup>                                      | NCBA     | 2 years   | 2012-2014 | Malaysia   | UM                  | Urban   | 1                                       | tertiary specialist hospital                                                          |
| Gebrehiwot 2014 <sup>17</sup>                                     | NCBA     | 18 months | 2011-2012 | Ethiopia   | L                   | Urban   | 10                                      | public hospitals                                                                      |
| Baltag 2012 <sup>18</sup>                                         | NCBA     | 13 months | 2005-2006 | Moldova    | LM                  | Mixed   | 3                                       | mixed (referral-level facilities at municipal, national and district levels)          |
| Kidanto 2012 <sup>19</sup>                                        | NCBA     | 3 years   | 2006-2009 | Tanzania   | L                   | Urban   | 1                                       | teaching hospital                                                                     |
| Sukhanberdiyev 2011 <sup>20</sup><br>Hodorogea 2010 <sup>21</sup> | NCBA     | 2 years   | 2009-2011 | Kazakhstan | UM                  | Urban   | 6                                       | national research centre, regional and city hospitals)                                |
| Van den Akker 2011 <sup>22</sup>                                  | ITS      | 2 years   | 2007-2009 | Malawi     | L                   | Rural   | 29                                      | mixed (1 referral hospital and 28 government, private and mission smaller facilities) |
| Bailey 2010 <sup>23</sup>                                         | NCBA     | 2 years   | 2003-2004 | Vietnam    | L §§                | Mixed   | 5                                       | mixed (provincial, area and district)                                                 |
| Van den Akker 2009 <sup>24</sup>                                  | NCBA     | 1 year    | 2007-2008 | Malawi     | L                   | Rural   | 1 + undefined numbers of health centers | mixed (referral hospital, health centers)                                             |

|                                        |      |           |           |                   |      |       |                               |                                                      |
|----------------------------------------|------|-----------|-----------|-------------------|------|-------|-------------------------------|------------------------------------------------------|
| <b>Hunyinbo 2008</b> <sup>25</sup>     | NCBA | 13 months | 2002-2003 | Nigeria           | L §§ | Urban | 1                             | tertiary specialist hospital                         |
| <b>Kongnyuy 2008</b> <sup>26</sup>     | NCBA | 2 years   | 2005-2007 | Malawi            | L    | Mixed | 73                            | mixed (hospitals, health centers)                    |
| <b>Kongnyuy 2008</b> <sup>27</sup>     | NCBA | 6 months  | 2006-2007 | Malawi            | L    | Rural | 1 hospital +12 health centers | one district hospital, plus satellite health centers |
| <b>Weeks 2005</b> <sup>28</sup>        | NCBA | 20 months | 2001-2002 | Uganda            | L    | Urban | 1                             | teaching hospital                                    |
| <b>Wagaarachchi 2001</b> <sup>29</sup> | NCBA | 26 months | 1997-2000 | Ghana and Jamaica | L §§ | Urban | 4                             | district hospitals                                   |

° NCBA= non controlled before and after study, ITS= Intermittent time series

§ L=Low income; LM=Lower middle income; UM=Upper middle income

§§ Ghana, Jamaica, Nigeria and Vietnam were classified as low income countries during the time of the study, while they were upgraded to lower middle income in 2010, 2007 2008, and 2009 respectively.

Table 2. Characteristics of the interventions

| Author                        | Characteristics of the audit                          | Who performed the audit *                                                                                                                                          | Who developed the recommendations **                 | Type of cases audited §                 | Selection criteria                                                                                                                 | N Case audited (before / after) | Woman Interview                                          | Associated interventions ° |
|-------------------------------|-------------------------------------------------------|--------------------------------------------------------------------------------------------------------------------------------------------------------------------|------------------------------------------------------|-----------------------------------------|------------------------------------------------------------------------------------------------------------------------------------|---------------------------------|----------------------------------------------------------|----------------------------|
| Lumala 2017 <sup>13</sup>     | two phases, retrospective                             | A medical doctor, using WHO guidelines as source of standard                                                                                                       | facility staff                                       | PPH and severe pre-eclampsia, eclampsia | All in-patient cases in the study period, not referred and not receiving hydralazine or magnesium sulphate from the referring unit | 238 (125 before, 133 after)     | no                                                       | G, T                       |
| Mgaya 2017 <sup>14</sup>      | two phases, retrospective                             | Trained postnatal ward nurses, using a pre-piloted form, and predefined standards (a consultant, a specialist and a midwife were also available for consultation ) | facility staff (AN, L, MO, MW, P)                    | obstructed labour                       | All cases of obstructed labour with a single foetus in cephalic presentation, and no other severe medical conditions or PROM       | 510 (260 before, 250 after)     | Yes, when necessary to integrate info from medical files | G, S, T                    |
| Kayiga 2016 <sup>15</sup>     | two phases, prospective                               | NR                                                                                                                                                                 | facility staff (MO, MW, M)                           | obstructed labour                       | all cases occurring in the study period                                                                                            | 360 (180 before, 180 after)     | yes                                                      | G, T                       |
| Mohd Azri 2015 <sup>16</sup>  | First phase retrospective, second regular prospective | NR                                                                                                                                                                 | facility staff (members of the obstetric department) | eclampsia                               | all cases occurring in the study period                                                                                            | 51 (42 before, 9 after)         | no                                                       | T, P, PA                   |
| Gebrehiwot 2014 <sup>17</sup> | prospective                                           | facility staff (MO, MW and other hospital staff + focal                                                                                                            | facility staff                                       | all NM + MD                             | all cases occurring in the study period                                                                                            | 2568                            | no                                                       | P                          |



|                                                                                 |                                                                  |                                                                              |                                                                              |                                                             |                                                                                                                                                                     |                                                              |     |         |
|---------------------------------------------------------------------------------|------------------------------------------------------------------|------------------------------------------------------------------------------|------------------------------------------------------------------------------|-------------------------------------------------------------|---------------------------------------------------------------------------------------------------------------------------------------------------------------------|--------------------------------------------------------------|-----|---------|
|                                                                                 |                                                                  | person)                                                                      |                                                                              |                                                             |                                                                                                                                                                     |                                                              |     |         |
| <b>Baltag 2012</b> <sup>18</sup>                                                | prospective                                                      | facility staff involved in case management (MO, MD + occasionally L, T, PHC) | facility staff involved in case management (MO, MD + occasionally L, T, PHC) | NM                                                          | not pre-defined criteria, cases were chosen by director. In one hospital a tendency to choose cases more likely to lead to praises for the maternity team was noted | 30 approx ( 1 case per month in each hospital)               | yes | G, P, S |
| <b>Kidanto 2012</b> <sup>19</sup>                                               | first phase retrospective, second prospective                    | 1 senior doctor                                                              | facility staff                                                               | eclampsia and pre-eclampsia                                 | all cases occurring in the study period                                                                                                                             | 477 (389 before, 88 after)                                   | no  | G, T, S |
| <b>Sukhanberdiyev 2011</b> <sup>20</sup><br><b>Hodorogea 2010</b> <sup>21</sup> | prospective                                                      | facility staff                                                               | facility staff                                                               | PPH and severe pre-eclampsia                                | NR                                                                                                                                                                  | Not more than 10 each hospital each year (total unspecified) | yes | P,S     |
| <b>Van den Akker 2011</b> <sup>22</sup>                                         | prospective every 2 to 3 weeks; quarterly evaluation of outcomes | facility staff, occasionally external obs gyn                                | facility staff                                                               | infection, PPH, uterine rupture, preeclampsia, others) + MD | all cases occurring in the study period                                                                                                                             | 45 (24 deaths; 21 SOC)                                       | no  | P,S     |

|                                         |                                                                                             |                                   |                                           |                                                                                                                |                                                                                                 |                             |    |                                   |
|-----------------------------------------|---------------------------------------------------------------------------------------------|-----------------------------------|-------------------------------------------|----------------------------------------------------------------------------------------------------------------|-------------------------------------------------------------------------------------------------|-----------------------------|----|-----------------------------------|
| <b>Bailey 2010</b> <sup>23</sup>        | first phase retrospective, than regular prospective                                         | facility staff (MO, N, M)         | facility staff (MO, N, M)                 | severe preeclampsia, postpartum infection, prolonged/obstructed labour, PPH, organisation of emergency service | all cases occurring in the study period                                                         | 558 (312 before, 246 after) | no | T,P,S                             |
| <b>Van den Akker 2009</b> <sup>24</sup> | prospective every 2- 3 weeks for 3 months than extended audit with 2 external obstetricians | facility staff (M,MA, MO, MW,N)   | facility staff (MO, N, M)                 | uterine rupture                                                                                                | cases that appeared to be of particular educational value to the PI or any other hospital staff | 35                          | no | T (TBA also involved in training) |
| <b>Hunjinbo 2008</b> <sup>25</sup>      | two phases, prospective                                                                     | Study investigator/s              | facility staff (M,MA, MO, N,P, L)         | PPH, uterine rupture, eclampsia, obstructed labour, sepsis                                                     | all cases occurring in the study period                                                         | 130 (65 before, 65 after)   | no | A, P,S                            |
| <b>Kongnyuy 2008</b> <sup>26</sup>      | two phases, prospective                                                                     | facility staff (AN,M,MO,MW, L, T) | facility staff (quality improvement team) | PPH, obstructed labour, sepsis, preeclampsia/ eclampsia, neonatal care, CS , women-friendly care+ MD           | NR                                                                                              | NR                          | no | T, P,S                            |
| <b>Kongnyuy 2008</b> <sup>27</sup>      | two phases, retrospective                                                                   | district team (N, MW, CO,AN,T)    | hospital staff (quality improvement team) | pre-eclampsia/ eclampsia, PPH, prolonged/ obstructed labour, retained placenta, sepsis, complications of       | all cases occurring in the study period                                                         | 122 (60 before, 62 after)   | no | T,S,P                             |

|                                        |                                               |                                                                          |                                               |                                                              |                                         |                              |    |       |
|----------------------------------------|-----------------------------------------------|--------------------------------------------------------------------------|-----------------------------------------------|--------------------------------------------------------------|-----------------------------------------|------------------------------|----|-------|
|                                        |                                               |                                                                          |                                               | abortion, ectopic pregnancy                                  |                                         |                              |    |       |
| <b>Weeks 2005</b> <sup>28</sup>        | first phase retrospective, second prospective | facility staff (including low grade staff)                               | facility staff                                | severe pre-eclampsia                                         | all cases occurring in the study period | 86 (43 before, 43 after)     | no | S     |
| <b>Wagaarachchi 2001</b> <sup>29</sup> | first phase retrospective, second prospective | non-medical assistants (10% of cases validated by independent re-review) | facility staff (M,MO, M + all relevant staff) | PPH, eclampsia, infection, obstructed labor, uterine rupture | all cases occurring in the study period | 889 ( 551 before, 338 after) | no | S,T,P |

\*NR= not reported

\*\* AN= anesthetist of anesthetic technician, CO=clinical officer, L= Laboratory, M= manager, MA=medical assistant, MO=medical officer, MW=midwife, N=nurse, P=Pharmacy, PHC= primary health care staff , T= technician

° A= advocacy with stakeholders G= guidelines, P=Protocols, PA= information for patients, S=standards, T=training, TBA= traditional birth attendants § CS= caesarian section, MD= maternal deaths, ND= neonatal deaths, NM=Near miss, PPH= post-partum hemorrhage, PROM= premature rupture of membranes, SOC= all severe obstetric cases, SEL= selected obstetric cases

**Table 3. Type of outcomes evaluated in the studies**

| Author                                                            | Patient centrality and acceptability | Accessibility<br>Timely care | Efficiency and equity | Safety | Effectiveness |
|-------------------------------------------------------------------|--------------------------------------|------------------------------|-----------------------|--------|---------------|
| Lumala 2017 <sup>13</sup>                                         | —                                    | yes                          | —                     | —      | yes           |
| Mgaya 2017 <sup>14</sup>                                          | —                                    | yes                          | —                     | —      | yes           |
| Kayiga 2016 <sup>15</sup>                                         | —                                    | —                            | —                     | —      | yes           |
| Mohd Azri 2015 <sup>16</sup>                                      | —                                    | —                            | —                     | —      | yes           |
| Gebrehiwot 2014 <sup>17</sup>                                     | —                                    | yes                          | —                     | —      | yes           |
| Baltag 2012 <sup>18</sup>                                         | yes                                  | —                            | —                     | —      | yes           |
| Kidanto 2012 <sup>19</sup>                                        | —                                    | yes                          | —                     | —      | yes           |
| Sukhanberdiyev 2011 <sup>20</sup><br>Hodorogea 2010 <sup>21</sup> | yes                                  | yes                          | —                     | —      | yes           |
| Van den Akker 2011 <sup>22</sup>                                  | —                                    | yes                          | —                     | —      | yes           |
| Bailey 2010 <sup>23</sup>                                         | —                                    | yes                          | —                     | —      | yes           |
| Van den Akker 2009 <sup>24</sup>                                  | —                                    | yes                          | —                     | —      | yes           |
| Hunyinbo 2008 <sup>25</sup>                                       | —                                    | yes                          | —                     | —      | yes           |
| Kongnyuy 2008 <sup>26</sup>                                       | —                                    | yes                          | —                     | —      | yes           |

1  
2  
3  
4  
5  
6  
7  
8  
9  
10  
11  
12  
13  
14  
15  
16  
17  
18  
19  
20  
21  
22  
23  
24  
25  
26  
27  
28  
29  
30  
31  
32  
33  
34  
35  
36  
37  
38  
39  
40  
41  
42  
43  
44  
45  
46  
47

|                                        |   |     |   |   |     |
|----------------------------------------|---|-----|---|---|-----|
| <b>Kongnyuy 2008</b> <sup>27</sup>     | — | yes | — | — | yes |
| <b>Weeks 2005</b> <sup>28</sup>        | — | yes | — | — | yes |
| <b>Wagaarachchi 2001</b> <sup>29</sup> | — | yes | — | — | yes |

For peer review only

**Table 4. Effectiveness of the NMCR cycle on health outcomes**

| Author                                                            | Maternal Mortality (MM) | Neonatal mortality (NM) | Morbidity and other outcomes                                                                                                                                                                                                                            |
|-------------------------------------------------------------------|-------------------------|-------------------------|---------------------------------------------------------------------------------------------------------------------------------------------------------------------------------------------------------------------------------------------------------|
| Lumala 2017 <sup>13</sup>                                         | -                       | -                       | -                                                                                                                                                                                                                                                       |
| Mgaya 2017 <sup>14</sup>                                          | -                       | -                       | SAMM (incidence: 9.0% vs. 8.8% (p = 0.98).<br>Uterine rupture (incidence): 1/260 vs 0/250 (p=0.49)<br>Perinatal severe morbidities and deaths and fresh stillbirths: 16% vs. 8.8% (p = 0.01)                                                            |
| Kayiga 2016 <sup>15</sup>                                         | -                       | NM: 27/180 vs 27/180    | Uterine rupture (Incidence): 8/180 vs 2/180 (p=0.04)<br>Maternal sepsis (Incidence): 10/180 vs 2/180 (p=0.02)<br>Post-spinal headache (incidence): 0/180 vs 13/180 (p<0.001)<br>Baby admitted to intensive care: 27/180 vs 31/180 (p=0.61)              |
| Mohd Azri 2015 <sup>16</sup>                                      | MM: 2/49 vs 1/9         | NM: 4/49 vs 3/9         | Eclampsia (incidence): 42/44818 vs 9/10784 (p> 0.05)<br>Recurrent eclamptic fits: 8/42 vs 1/9 (p> 0.05)<br>Newborn babies with Apgar score (< 7) at 5 minutes after birth: 8/42 vs 3/9 (p> 0.05)<br>Birth weight less than 2500g 22/42 vs 5/9 (p> 0.05) |
| Gebrehiwot 2014 <sup>17</sup>                                     | -                       | -                       | -                                                                                                                                                                                                                                                       |
| Baltag 2012 <sup>18</sup>                                         | -                       | -                       | -                                                                                                                                                                                                                                                       |
| Kidanto 2012 <sup>19</sup>                                        | MM 30/389 vs 0/88       | PM: 161/389 vs 32/88    | -                                                                                                                                                                                                                                                       |
| Sukhanberdiyev 2011 <sup>20</sup><br>Hodorogea 2010 <sup>21</sup> | -                       | -                       | Improved patients satisfaction (NR)                                                                                                                                                                                                                     |
| Van den Akker 2011 <sup>22</sup>                                  | MM 6/2295 vs 4/5291     | -                       | SAMM (Incidence): 33/2295 vs 49/5291 (p=0.08)<br>Major PPH (incidence): 17/2295 vs 15/5291 (p=0.006)<br>Uterine rupture (Incidence): 14/2295 vs 4/5291 (p=0.03)<br>Severe pre-eclampsia (Incidence): 6/2295 vs 16/5291 (p=0.3)                          |

1  
2  
3  
4  
5  
6  
7  
8  
9  
10  
11  
12  
13  
14  
15  
16  
17  
18  
19  
20  
21  
22  
23  
24  
25  
26  
27  
28  
29  
30  
31  
32  
33  
34  
35  
36  
37  
38  
39  
40  
41  
42  
43  
44  
45  
46  
47

|                                         |                               |                  |                                                                             |
|-----------------------------------------|-------------------------------|------------------|-----------------------------------------------------------------------------|
|                                         |                               |                  | Maternal infections (Incidence): 10/2295 vs 14/5291 (p=0.6)                 |
| <b>Bailey 2010</b> <sup>23</sup>        | -                             | -                | -                                                                           |
| <b>Van den Akker 2009</b> <sup>24</sup> | -                             | -                | Uterine rupture (incidence): 16/833 vs 19/3099 (OR 0.32; 95% CI, 0.16–0.63) |
| <b>Hun Yinbo 2008</b> <sup>25</sup>     | MM: 2/65 vs 2/65              | -                |                                                                             |
| <b>Kongnyuy 2008</b> <sup>26</sup>      | MM: 104/2618685 vs 93/2944360 |                  | -                                                                           |
| <b>Kongnyuy 2008</b> <sup>27</sup>      | MM 3/60 vs 2/62               | PM: 5/60 vs 3/62 | -                                                                           |
| <b>Weeks 2005</b> <sup>28</sup>         | MM: 4/43 vs 0/43              | -                | Eclampsia (incidence): 5/43 vs 5/43 (p> 0.05)                               |
| <b>Wagaarachchi 2001</b> <sup>29</sup>  | MM: 18/551 vs 17/338          | -                | -                                                                           |

Abbreviations: CFR= case fatality rate; MM= maternal mortality; MMO= maternal morbidity; NM= neonatal mortality; NR= not further specified; PM: perinatal mortality; PPH= post partum hemorrhage; SAMM: severe acute maternal morbidity

**Table 5. Effectiveness of the NMCR cycle on the process of care**

| Author                                                                          | Statistically significant improvement in pre-defined standards                                                                                            | Other improvements                                                                                                                                                                                                                                                  |
|---------------------------------------------------------------------------------|-----------------------------------------------------------------------------------------------------------------------------------------------------------|---------------------------------------------------------------------------------------------------------------------------------------------------------------------------------------------------------------------------------------------------------------------|
| <b>Lumala 2017</b> <sup>13</sup>                                                | Eclampsia and pre-eclampsia: 7/10 standards<br>PPH: 3/4 standards                                                                                         | -                                                                                                                                                                                                                                                                   |
| <b>Mgaya 2017</b> <sup>14</sup>                                                 | Obstructed labour: 6/10 standards on diagnosis, 6/10 standards on case management                                                                         | Improved timeliness: significant reduction of time needed from decision to perform a caesarian section to delivery (mean difference:- 30 minutes, p< 0.001)                                                                                                         |
| <b>Kayiga 2016</b> <sup>15</sup>                                                | Obstructed labour: 2/6 standards, 4/13 measures of standards                                                                                              | -                                                                                                                                                                                                                                                                   |
| <b>Mohd Azri 2015</b> <sup>16</sup>                                             | Improved adherence to 2/2 audit criteria that were substandard in the first phase (all other 10 criteria were already according to standards at baseline) | -                                                                                                                                                                                                                                                                   |
| <b>Gebrehiwot 2014</b> <sup>17</sup>                                            | -                                                                                                                                                         | Almost all piloted hospitals and some health centers use partograph to follow uterine contraction during labor<br>Improved documentation and reporting<br>Improved referral linkage and communication to and from satellite health centers<br>Reducing waiting time |
| <b>Baltag 2012</b> <sup>18</sup>                                                | -                                                                                                                                                         | Improved clinical practice (NS)<br>Improved medical records<br>Improved attitude towards patients                                                                                                                                                                   |
| <b>Kidanto 2012</b> <sup>19</sup>                                               | Eclampsia and pre-eclampsia: 10/16 standards                                                                                                              | -                                                                                                                                                                                                                                                                   |
| <b>Sukhanberdiyev 2011</b> <sup>20</sup><br><b>Hodorogea 2010</b> <sup>21</sup> | -                                                                                                                                                         | Improved case management and monitoring (eg weighing of blood losses and documenting systematically) eliminating obvious mistakes<br>Improved acceptance and the utilization and integration of                                                                     |



|                                         |                                                                                                                     |                                                                                                                         |
|-----------------------------------------|---------------------------------------------------------------------------------------------------------------------|-------------------------------------------------------------------------------------------------------------------------|
|                                         |                                                                                                                     | technologies promoted and evidenced-based practices by the national guidelines                                          |
| <b>Van den Akker 2011</b> <sup>22</sup> | -                                                                                                                   | Improved patients monitoring                                                                                            |
| <b>Bailey 2010</b> <sup>23</sup>        | Eclampsia: 12/18 standards<br>Infections: 11/23 standards<br>Obstructed labour: 1/1 standards<br>PPH: 3/3 standards | -                                                                                                                       |
| <b>Van den Akker 2009</b> <sup>24</sup> | -                                                                                                                   | -                                                                                                                       |
| <b>Hunyinbo 2008</b> <sup>25</sup>      | SAMM: 8/31 standards                                                                                                | -                                                                                                                       |
| <b>Kongnyuy 2008</b> <sup>26</sup>      | -                                                                                                                   | Significant increase in the met need for EmOC (15.2% for 2005, 17.0% for 2006 and 18.8% for 2007, p for trend < 0.001). |
| <b>Kongnyuy 2008</b> <sup>27</sup>      | SAMM: 4 /7 standards<br>(other criteria were already according to standards at baseline)                            | -                                                                                                                       |
| <b>Weeks 2005</b> <sup>28</sup>         | Severe pre-eclampsia: 5/9 standards                                                                                 | -                                                                                                                       |
| <b>Wagaarachchi 2001</b> <sup>29</sup>  | SA: 8/31 standards                                                                                                  | -                                                                                                                       |

Abbreviations: SAMM=Severe acute maternal morbidity

**Table 6. Effectiveness of the NMCR cycle on the structure**

| Author                        | Physical structure                             | Staffing                                                                            | Equipment and supplies                            | Training, monitoring and supervision                 | Local policies and organization of services                                                                                                                                                                                                                                                                                                                             |
|-------------------------------|------------------------------------------------|-------------------------------------------------------------------------------------|---------------------------------------------------|------------------------------------------------------|-------------------------------------------------------------------------------------------------------------------------------------------------------------------------------------------------------------------------------------------------------------------------------------------------------------------------------------------------------------------------|
| Lumala 2017 <sup>13</sup>     |                                                |                                                                                     |                                                   | Training sessions, drills and simulations            | Improved displaying of national guidelines                                                                                                                                                                                                                                                                                                                              |
| Mgaya 2017 <sup>14</sup>      |                                                |                                                                                     |                                                   | Training and supervision                             | Introduction and dissemination of guidelines, Improved team work and internal communication among hospital staff                                                                                                                                                                                                                                                        |
| Kayiga 2016 <sup>15</sup>     |                                                |                                                                                     |                                                   |                                                      | Re-engineering hospital Red Alert System: list of responsible person to be contacted during Red Alert activation was put up in all obstetrics facilities; Information on the importance of activating the Red Alert in eclampsia cases was disseminated to all staff; hospital telephone operator was informed regarding existence of this system and how it functions. |
| Mohd Azri 2015 <sup>16</sup>  |                                                | Better specification of roles and responsibilities                                  |                                                   |                                                      |                                                                                                                                                                                                                                                                                                                                                                         |
| Gebrehiwot 2014 <sup>17</sup> | Some hospitals expanded accommodate more cases | Staff organization: duties assignment; staff rotation every 12 h to avoid tiredness | Contribution of resources (stationery, transport) | Provision of training and feedback to health centers | Protocols, improved coordination with health centers                                                                                                                                                                                                                                                                                                                    |
| Baltag 2012 <sup>18</sup>     |                                                |                                                                                     | Improved equipment and supplies                   |                                                      | Protocols, organization of care and management                                                                                                                                                                                                                                                                                                                          |
| Kidanto 2012 <sup>19</sup>    |                                                | Improved doctor availability                                                        |                                                   |                                                      | Reorganization of daily routine and setting of priorities, doctors assigned to manage cases of eclampsia                                                                                                                                                                                                                                                                |

|                                                                                         |                                                                                             |                                                                                                                                                                                  |                                                                                                                |                                                                                               |                                                                                                                                                                                                                                                                                 |
|-----------------------------------------------------------------------------------------|---------------------------------------------------------------------------------------------|----------------------------------------------------------------------------------------------------------------------------------------------------------------------------------|----------------------------------------------------------------------------------------------------------------|-----------------------------------------------------------------------------------------------|---------------------------------------------------------------------------------------------------------------------------------------------------------------------------------------------------------------------------------------------------------------------------------|
| <p><b>Sukhanberdiyev 2011</b> <sup>20</sup><br/><b>Hodorogea 2010</b> <sup>21</sup></p> |                                                                                             | <p>Rational use of staff by internal redistribution, optimization of human resources by reducing the working hours, increased role of mid-level staff (midwives and nurses);</p> | <p>Mobile devices for timely alert and warning, drugs and blood components, prostaglandins and uterotonics</p> | <p>Training on protocols and standards, periodic drills, improving time management skills</p> | <p>Developing new protocols, developing emergency care algorithms and conditions for transportation from remote areas, identifying the responsible person for the readiness of the emergency kit, monitoring forms, weighing of blood losses and documenting systematically</p> |
| <p><b>Van den Akker 2011</b> <sup>22</sup></p>                                          |                                                                                             |                                                                                                                                                                                  |                                                                                                                | <p>Training, regular on job coaching, improved supervision, monitoring of ambulance use</p>   | <p>Protocols and use of partograph</p>                                                                                                                                                                                                                                          |
| <p><b>Bailey 2010</b> <sup>23</sup></p>                                                 |                                                                                             |                                                                                                                                                                                  | <p>Purchase of equipment (lab, car for oncall, telephone for emergency), wall flow charts</p>                  | <p>Training, supervision</p>                                                                  | <p>Leadership on implementing changes, standardization of treatment with protocols and checklists, team work record keeping</p>                                                                                                                                                 |
| <p><b>Van den Akker 2009</b> <sup>24</sup></p>                                          |                                                                                             |                                                                                                                                                                                  | <p>More ambulance</p>                                                                                          | <p>Training, supervision, follow up visits in health centers</p>                              | <p>Protocols, transport organization, organize session for theater staff with the intention to reduce delay in surgical care</p>                                                                                                                                                |
| <p><b>Hunyinbo 2008</b> <sup>25</sup></p>                                               |                                                                                             |                                                                                                                                                                                  | <p>Pharmacy supply including oxytocins, MgSO<sub>4</sub>, blood and coagulation tests</p>                      |                                                                                               | <p>Protocols, clinical meetings, observational and fluid balance charts</p>                                                                                                                                                                                                     |
| <p><b>Kongnyuy 2008</b> <sup>26</sup></p>                                               | <p>The number of comprehensive and basic EmOC facilities did not change over the 3-year</p> |                                                                                                                                                                                  |                                                                                                                |                                                                                               |                                                                                                                                                                                                                                                                                 |

|                                        |  |                                                                                                                              |                                                            |          |                                                                                                                                                                                                                                                                  |
|----------------------------------------|--|------------------------------------------------------------------------------------------------------------------------------|------------------------------------------------------------|----------|------------------------------------------------------------------------------------------------------------------------------------------------------------------------------------------------------------------------------------------------------------------|
| <b>Kongnyuy 2008</b> <sup>27</sup>     |  | Autonomy in decision making in MW-N                                                                                          | Better equipment and set up of service                     | Training | Reorganization of emergency care service, including use of ambulances,                                                                                                                                                                                           |
| <b>Weeks 2005</b> <sup>28</sup>        |  | Staff in the labour room reorganised giving each member a specific role in the management of emergencies; two extra midwives | Equipment (urine dipstick, BP machines)                    |          | Triage established, leadership (direct of labour appointed), protocol and chart, commitment to improve medical files, departmental meetings, fundraising (a fundraising committee was established to raise funds for the drugs and equipment in recommendations) |
| <b>Wagaarachchi 2001</b> <sup>29</sup> |  |                                                                                                                              | Record storage, blood cultures, structured patient records |          | Protocols, reviewing supervisory responsibilities, organization of regular clinical meetings                                                                                                                                                                     |

Abbreviations: BP= Blood pressure; EmOC= Emergency Obstetric Care; N= Nurses; M=Midwives

1  
2  
3  
4  
5  
6  
7  
8  
9  
10  
11  
12  
13  
14  
15  
16  
17  
18  
19  
20  
21  
22  
23  
24  
25  
26  
27  
28  
29  
30  
31  
32  
33  
34  
35  
36  
37  
38  
39  
40  
41  
42  
43  
44  
45  
46  
47  
48  
49  
50  
51  
52  
53  
54  
55  
56  
57  
58  
59  
60

Figure 1. Study Flow Diagram

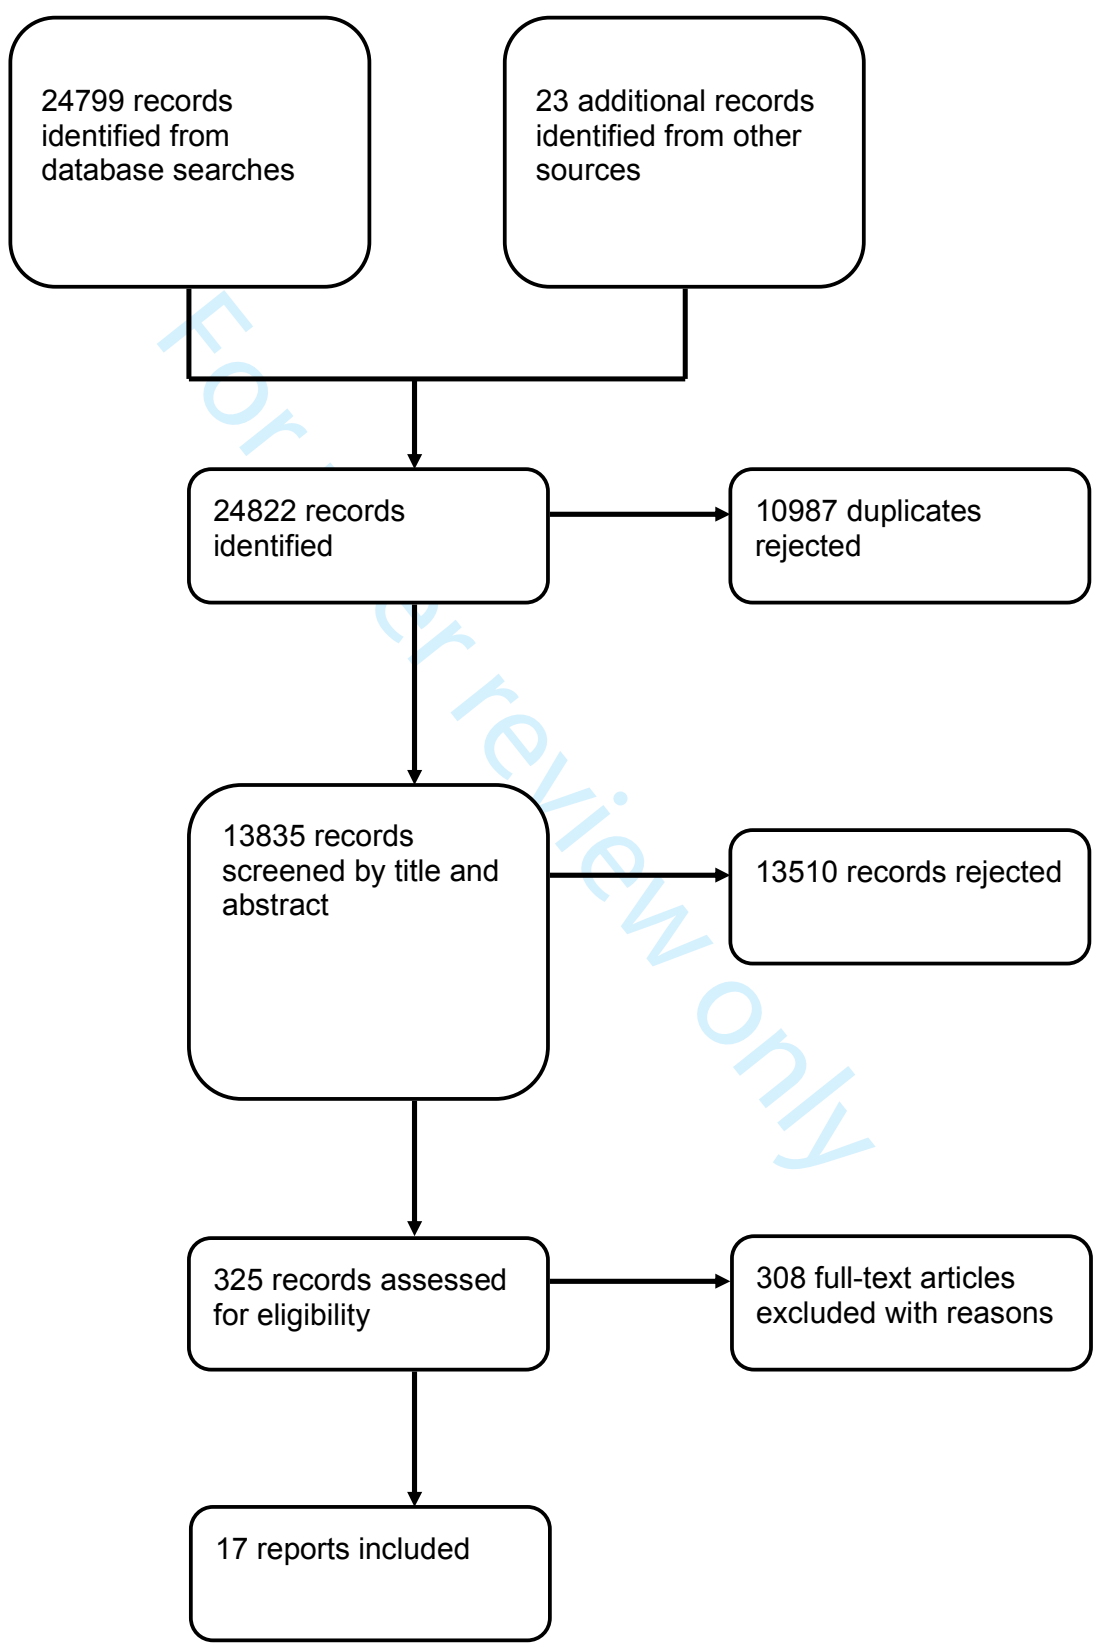

Figure 2. Pooled effect of the NMCR on maternal mortality

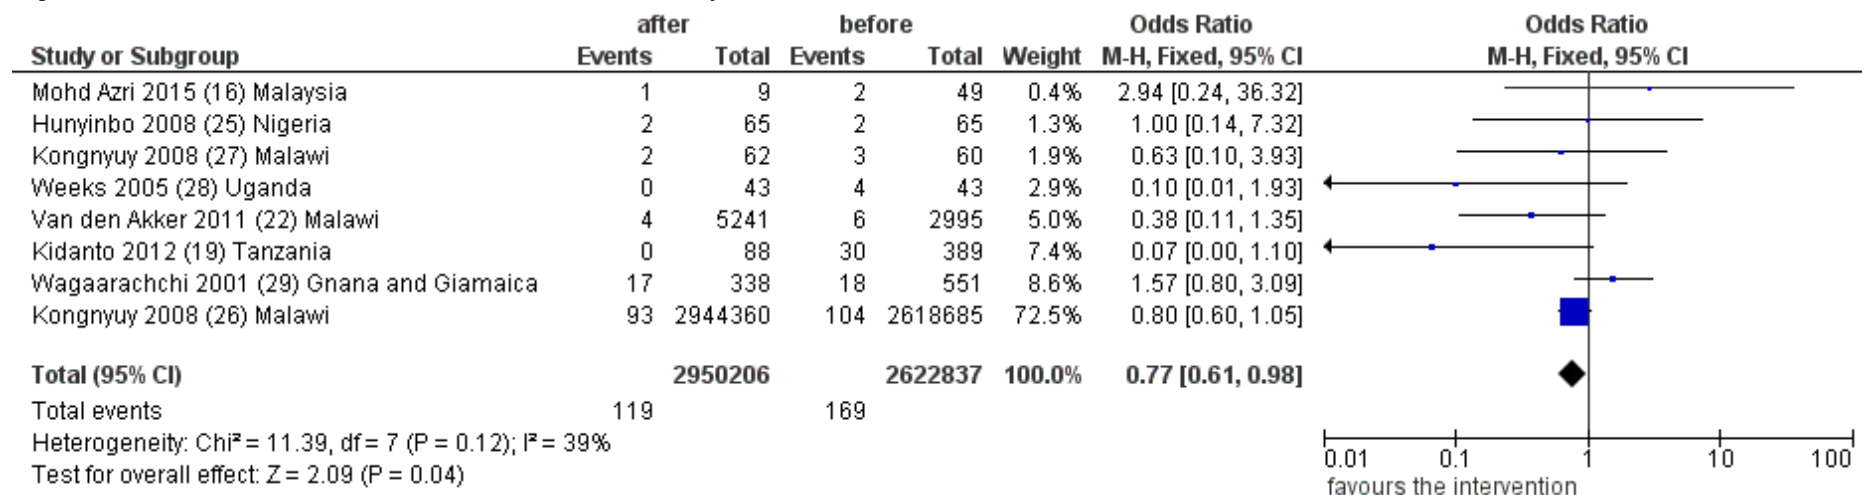

Figure 3. Pooled effect of the NMCR on perinatal or neonatal mortality

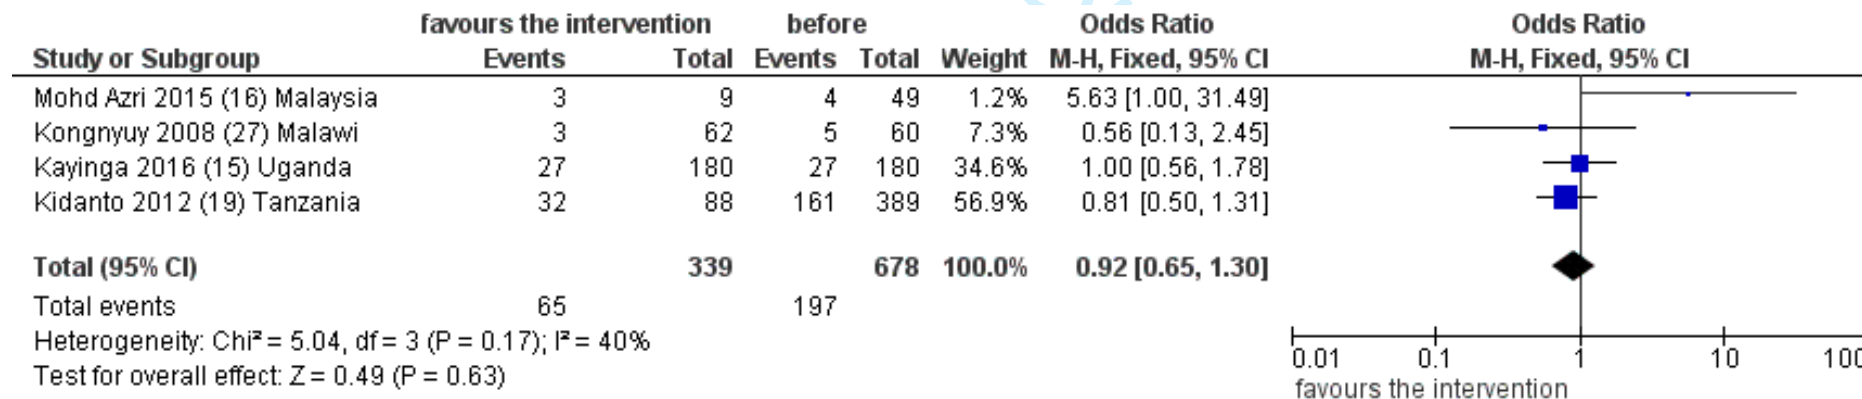

Table S1. Risk of bias

| Author                                                                          | Study design | Risk of bias criteria for RCTs, CCTs, CBAs, UCBA |                               |                 |                                |                            | Additive risk of bias criteria for ITS            |                                                       |                                                         |
|---------------------------------------------------------------------------------|--------------|--------------------------------------------------|-------------------------------|-----------------|--------------------------------|----------------------------|---------------------------------------------------|-------------------------------------------------------|---------------------------------------------------------|
|                                                                                 |              | <i>Random sequence generation</i>                | <i>Allocation concealment</i> | <i>Blinding</i> | <i>Incomplete outcome data</i> | <i>Selective reporting</i> | <i>Intervention independent of other changes?</i> | <i>Shape of the intervention effect prespecified?</i> | <i>Intervention unlikely to affect data collection?</i> |
| <b>Lumala 2017</b> <sup>13</sup>                                                | ITS          | high                                             | high                          | high            | low                            | unclear                    | high                                              | low                                                   | high                                                    |
| <b>Mgaya 2017</b> <sup>14</sup>                                                 | NCBA         | high                                             | high                          | high            | low                            | unclear                    |                                                   |                                                       |                                                         |
| <b>Kayiga 2016</b> <sup>15</sup>                                                | NCBA         | high                                             | high                          | high            | low                            | unclear                    |                                                   |                                                       |                                                         |
| <b>Mohd Azri 2015</b> <sup>16</sup>                                             | NCBA         | high                                             | high                          | high            | low                            | unclear                    |                                                   |                                                       |                                                         |
| <b>Gebrehiwot 2014</b> <sup>17</sup>                                            | NCBA         | high                                             | high                          | high            | low                            | unclear                    |                                                   |                                                       |                                                         |
| <b>Baltag 2012</b> <sup>18</sup>                                                | NCBA         | high                                             | high                          | high            | low                            | unclear                    |                                                   |                                                       |                                                         |
| <b>Kidanto 2012</b> <sup>19</sup>                                               | NCBA         | high                                             | high                          | high            | low                            | unclear                    |                                                   |                                                       |                                                         |
| <b>Sukhanberdiyev 2011</b> <sup>20</sup><br><b>Hodorogea 2010</b> <sup>21</sup> | NCBA         | high                                             | high                          | high            | low                            | unclear                    |                                                   |                                                       |                                                         |
| <b>Van den Akker 2011</b> <sup>22</sup>                                         | ITS          | high                                             | high                          | high            | low                            | unclear                    | high                                              | low                                                   | high                                                    |
| <b>Bailey 2010</b> <sup>23</sup>                                                | NCBA         | high                                             | high                          | high            | low                            | unclear                    |                                                   |                                                       |                                                         |
| <b>Van den Akker 2009</b> <sup>24</sup>                                         | NCBA         | high                                             | high                          | high            | low                            | unclear                    |                                                   |                                                       |                                                         |

|                                        |      |      |      |      |     |         |  |  |  |
|----------------------------------------|------|------|------|------|-----|---------|--|--|--|
| <b>Hun Yinbo 2008</b> <sup>25</sup>    | NCBA | high | high | high | low | unclear |  |  |  |
| <b>Kongnyuy 2008</b> <sup>26</sup>     | NCBA | high | high | high | low | unclear |  |  |  |
| <b>Kongnyuy 2008</b> <sup>27</sup>     | NCBA | high | high | high | low | unclear |  |  |  |
| <b>Weeks 2005</b> <sup>28</sup>        | NCBA | high | high | high | low | unclear |  |  |  |
| <b>Wagaarachchi 2001</b> <sup>29</sup> | NCBA | high | high | high | low | unclear |  |  |  |

Peer review only



Figure S1. Sensitivity analysis : Pooled effect of the NMCR on maternal mortality in studies with at least 300 cases and 30 events

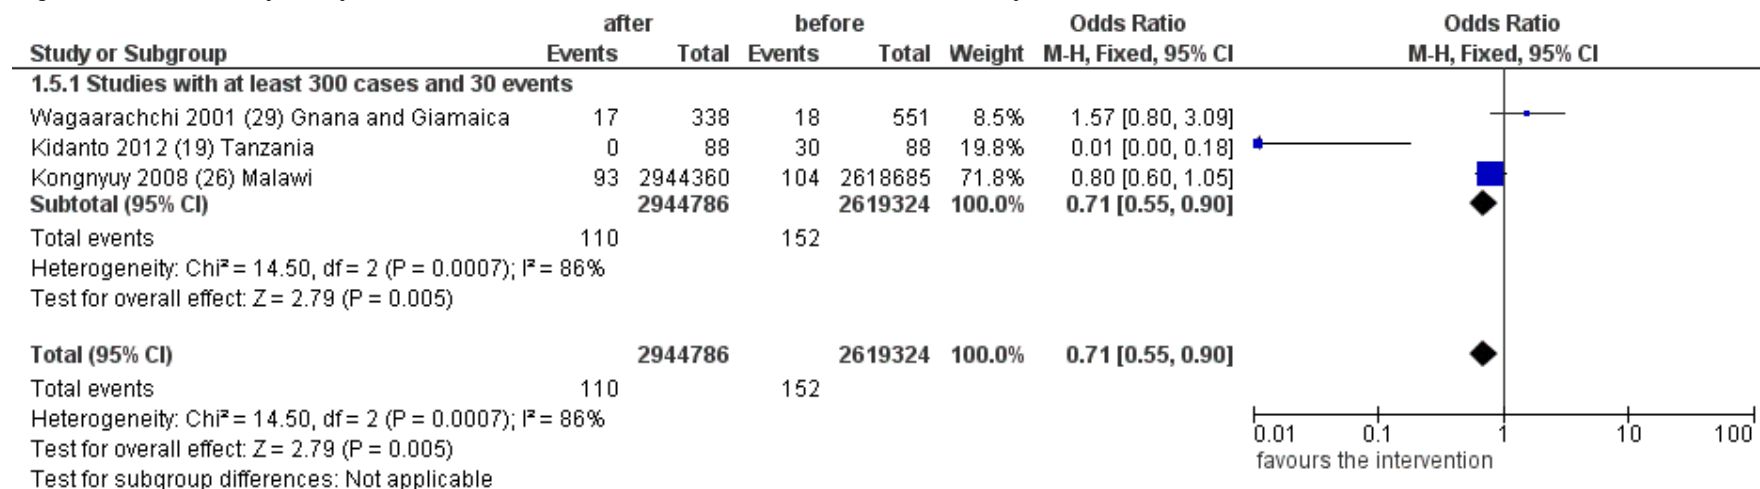

Figure S2. Sensitivity analysis : Pooled effect of the NMCR on perinatal mortality in studies with at least 300 cases and 30 events

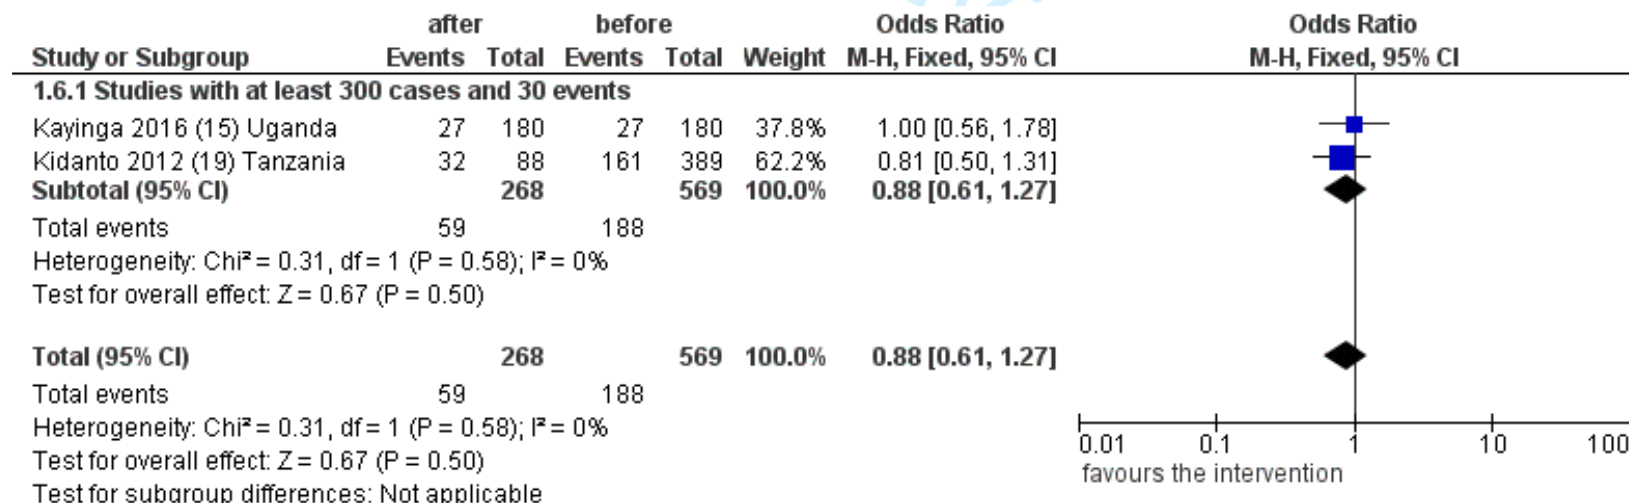

Figure S3. Subgroup analysis : Pooled effect of the NMCR audit on maternal mortality by country income

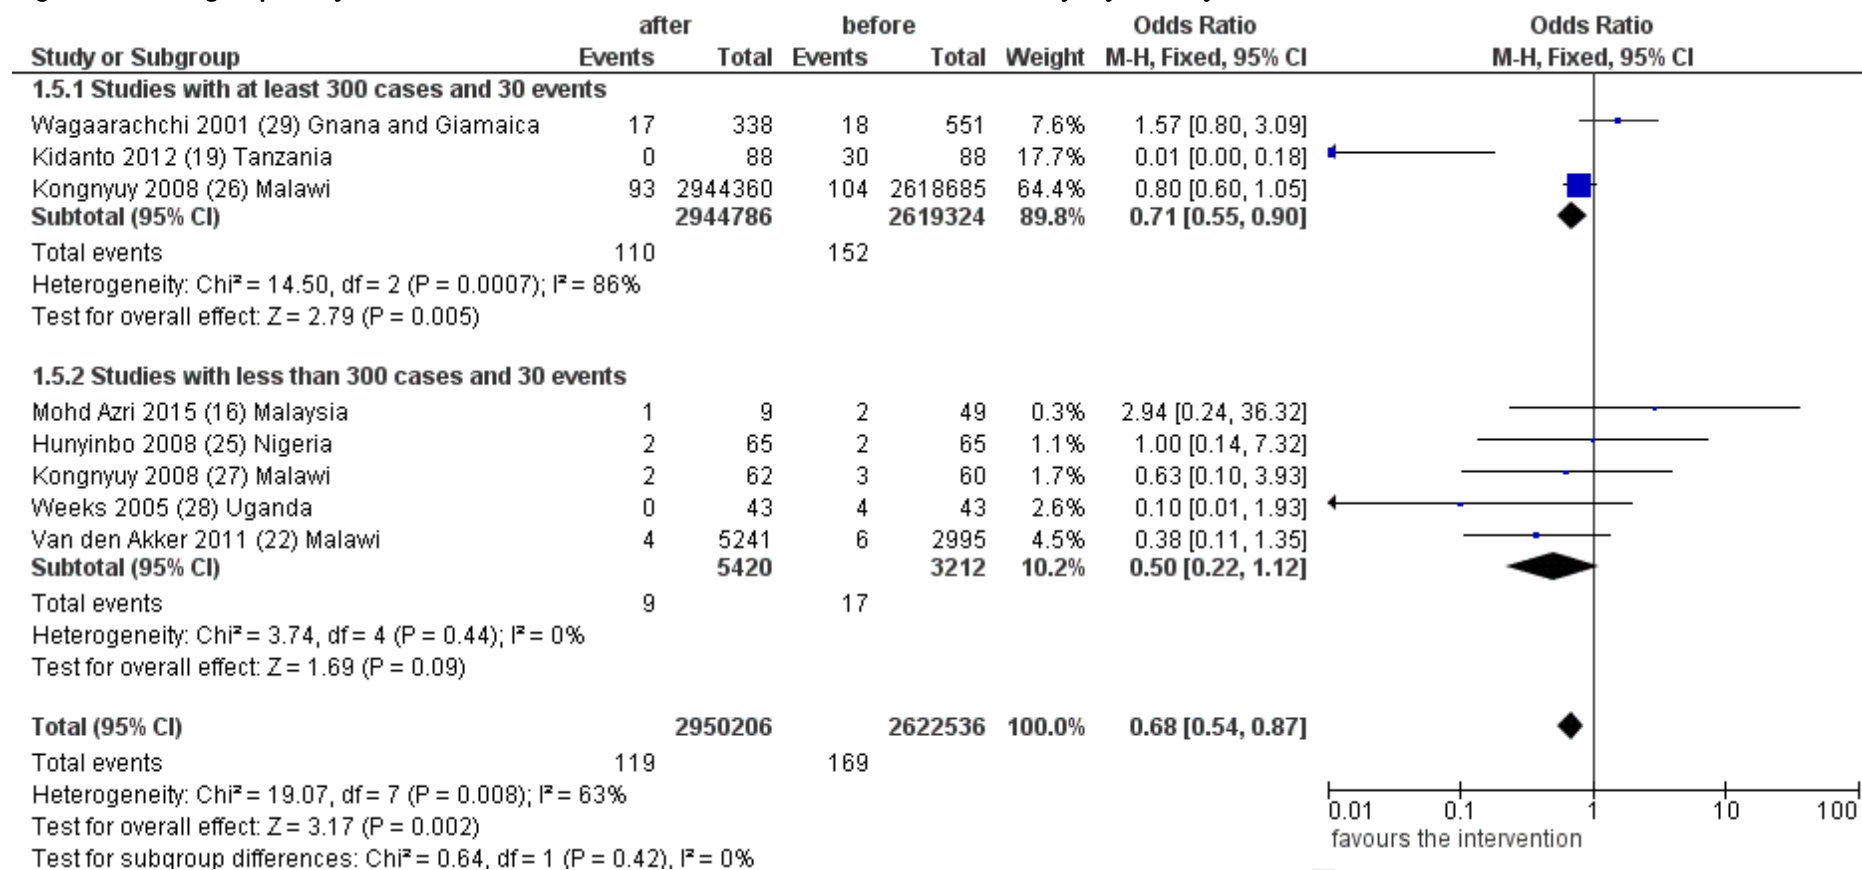

Figure S4. Subgroup analysis : Pooled effect of the NMCR on perinatal mortality by country income

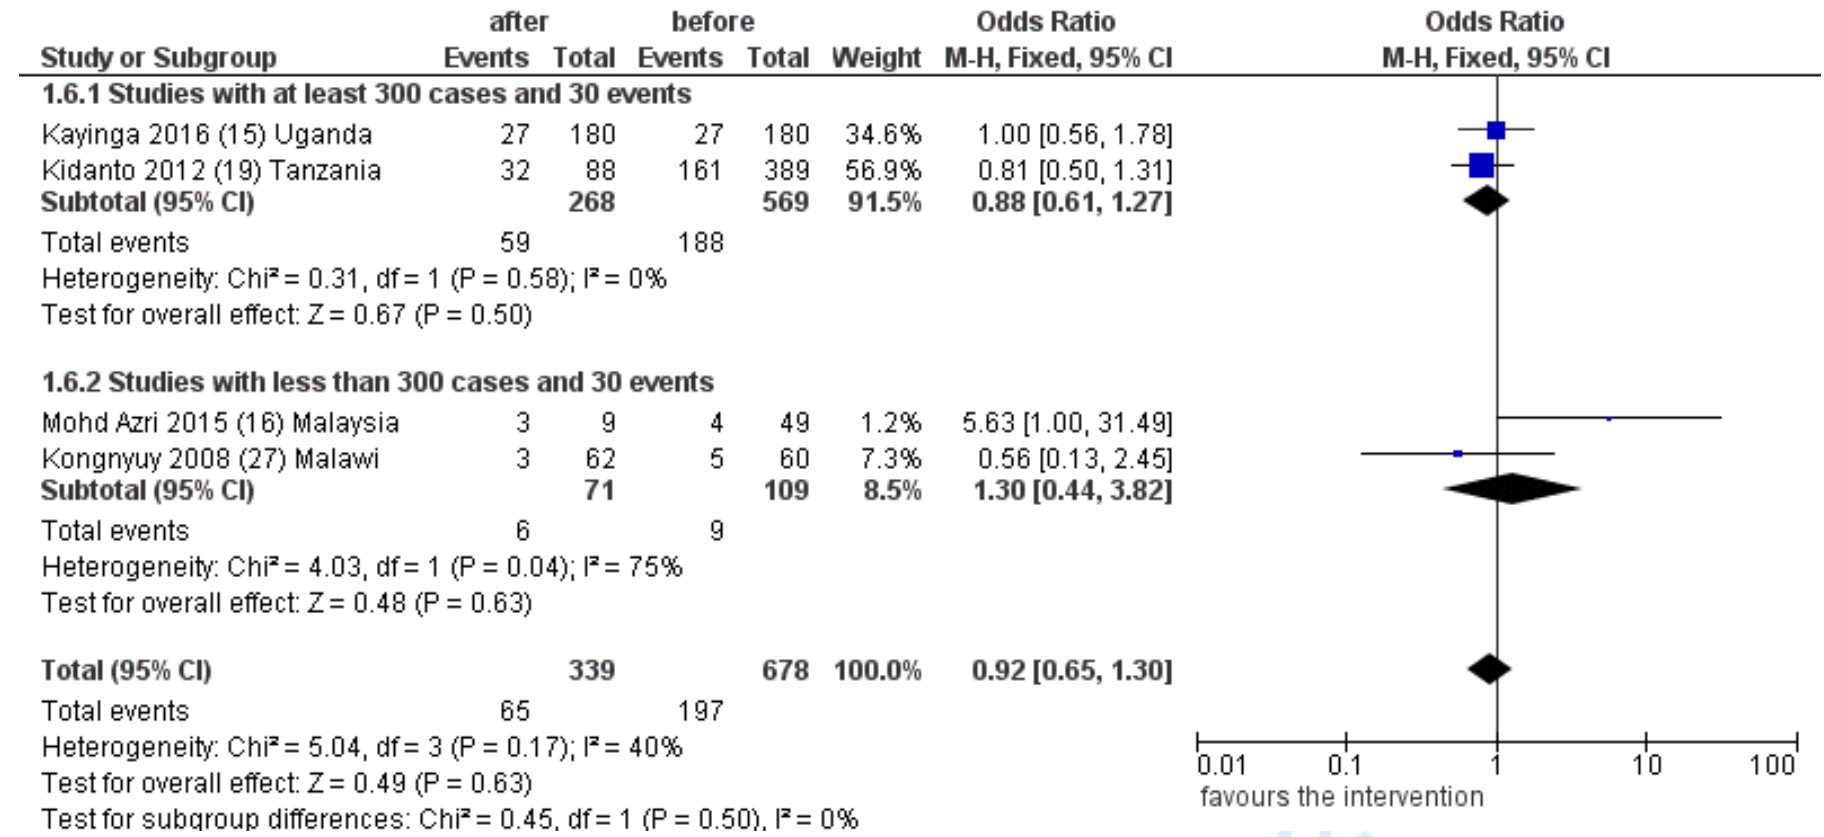

Figure S5. Funnel plot: effect of the NMCR on maternal mortality

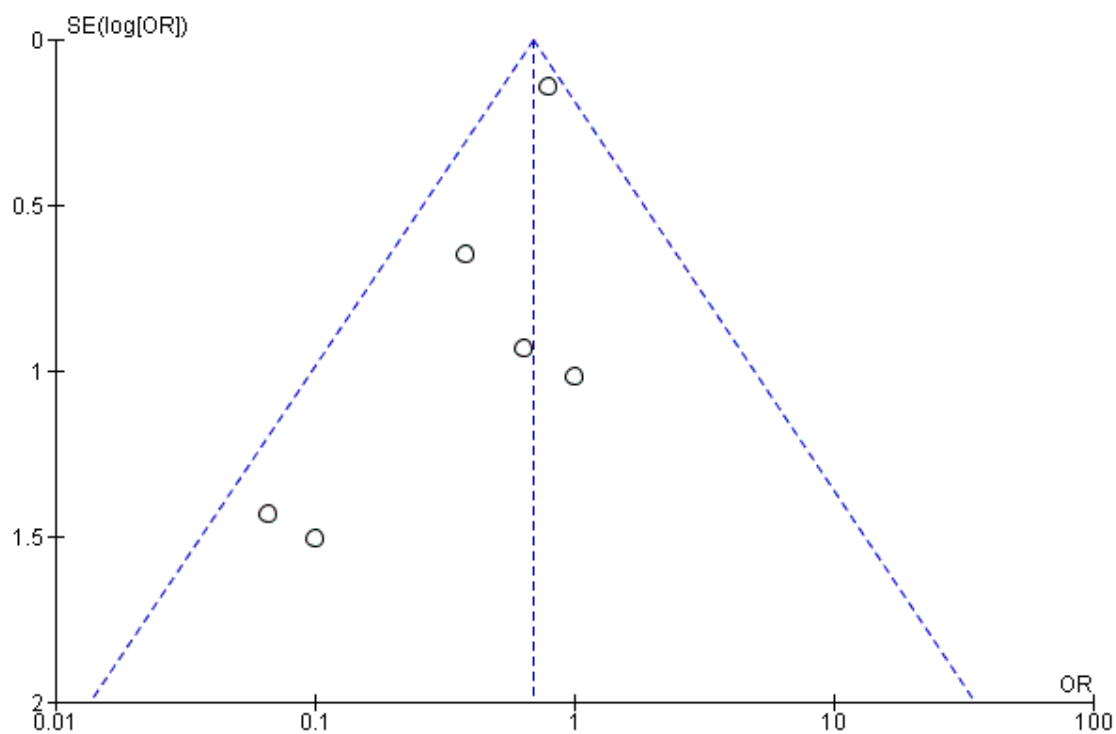

Figure S6. Funnel plot: effect of the NMCR on perinatal mortality

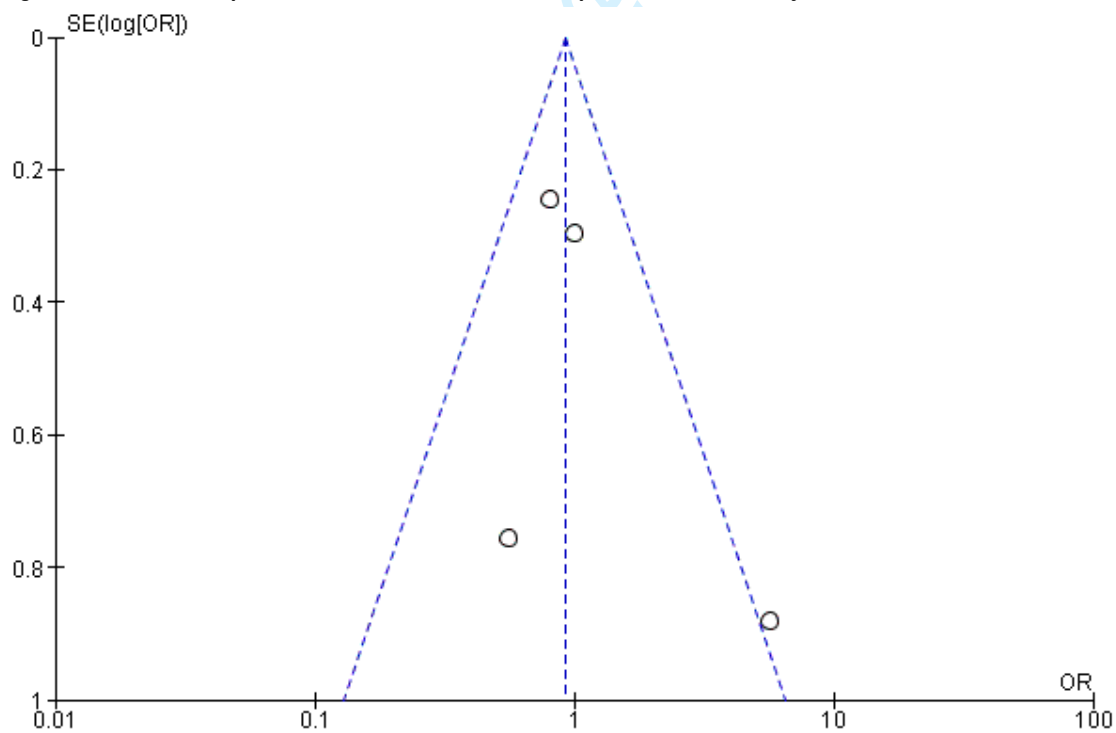

## Box 1. Search strategy

**PubMed**                      **Date: Sept 15, 2017**      **Total retrieved: 5578**

"near miss" OR (audit AND (obstetric\* OR matern\* OR pregnan\* OR woman OR women))

**Lilacs**                      **Date: Sept 15, 2017**      **Total retrieved: 227**

(TW:near miss OR MH:near miss) OR ((TW:audit OR MH:audit OR TW:auditoria OR MH:auditoria OR auditoría) AND (gravid\$ OR pregnan\$ OR enceint\$ OR embarazad\$ OR obstetr\$ OR mulher\$ OR mujer\$ OR femme\$ OR woman OR women OR matern\$))

**Global Idex Medicus**      **Date: Sept 15, 2017**      **Total retrieved: 7806**

(TW:near miss OR MH:near miss) OR ((TW:audit OR MH:audit OR TW:auditoria OR MH:auditoria OR auditoría) AND (gravid\$ OR pregnan\$ OR enceint\$ OR embarazad\$ OR obstetr\$ OR mulher\$ OR mujer\$ OR femme\$ OR woman OR women OR matern\$))

**Web of Science**                      **Date: Sept 18, 2017**      **Total retrieved: 4850**

TS= "near miss" OR (TS=audit AND TS=(gravid\* OR pregnan\* OR obstetr\* OR woman OR women OR matern\*))

**Cochrane Library**                      **Date: Sept 15, 2017**      **Total retrieved: :411**

"near miss" OR (audit AND (gravid\* or pregnan\* or obstetr\* or woman or women or matern\*))

**EMBASE**                      **Date: Sept 15, 2017**      **Total retrieved: 5927**

- 1 ("near miss" or audit).ab. (34259)
- 2 (obstetric\* or matern\* or pregnan\* or woman or women).ab. (1057153)
- 3 1 and 2 (4764)
- 4 ("near miss" or audit).ti. (13725)
- 5 (obstetric\* or matern\* or pregnan\* or woman or women).ti. (325314)
- 6 4 and 5 (724)
- 7 3 or 6 (4962)

1  
2  
3  
4  
5  
6  
7  
8  
9  
10  
11  
12  
13  
14  
15  
16  
17  
18  
19  
20  
21  
22  
23  
24  
25  
26  
27  
28  
29  
30  
31  
32  
33  
34  
35  
36  
37  
38  
39  
40  
41  
42  
43  
44  
45  
46  
47

For peer review only

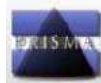

# PRISMA 2009 Checklist

| Section/topic                      | #  | Checklist item                                                                                                                                                                                                                                                                                              | Reported on page # |
|------------------------------------|----|-------------------------------------------------------------------------------------------------------------------------------------------------------------------------------------------------------------------------------------------------------------------------------------------------------------|--------------------|
| <b>TITLE</b>                       |    |                                                                                                                                                                                                                                                                                                             |                    |
| Title                              | 1  | Identify the report as a systematic review, meta-analysis, or both.                                                                                                                                                                                                                                         | 1                  |
| <b>ABSTRACT</b>                    |    |                                                                                                                                                                                                                                                                                                             |                    |
| Structured summary                 | 2  | Provide a structured summary including, as applicable: background; objectives; data sources; study eligibility criteria, participants, and interventions; study appraisal and synthesis methods; results; limitations; conclusions and implications of key findings; systematic review registration number. | 2                  |
| <b>INTRODUCTION</b>                |    |                                                                                                                                                                                                                                                                                                             |                    |
| Rationale                          | 3  | Describe the rationale for the review in the context of what is already known.                                                                                                                                                                                                                              | 4                  |
| Objectives                         | 4  | Provide an explicit statement of questions being addressed with reference to participants, interventions, comparisons, outcomes, and study design (PICOS).                                                                                                                                                  | 5                  |
| <b>METHODS</b>                     |    |                                                                                                                                                                                                                                                                                                             |                    |
| Protocol and registration          | 5  | Indicate if a review protocol exists, if and where it can be accessed (e.g., Web address), and, if available, provide registration information including registration number.                                                                                                                               | 5                  |
| Eligibility criteria               | 6  | Specify study characteristics (e.g., PICOS, length of follow-up) and report characteristics (e.g., years considered, language, publication status) used as criteria for eligibility, giving rationale.                                                                                                      | 5                  |
| Information sources                | 7  | Describe all information sources (e.g., databases with dates of coverage, contact with study authors to identify additional studies) in the search and date last searched.                                                                                                                                  | 5                  |
| Search                             | 8  | Present full electronic search strategy for at least one database, including any limits used, such that it could be repeated.                                                                                                                                                                               | 42 (box 1)         |
| Study selection                    | 9  | State the process for selecting studies (i.e., screening, eligibility, included in systematic review, and, if applicable, included in the meta-analysis).                                                                                                                                                   | 6                  |
| Data collection process            | 10 | Describe method of data extraction from reports (e.g., piloted forms, independently, in duplicate) and any processes for obtaining and confirming data from investigators.                                                                                                                                  | 6                  |
| Data items                         | 11 | List and define all variables for which data were sought (e.g., PICOS, funding sources) and any assumptions and simplifications made.                                                                                                                                                                       | 6                  |
| Risk of bias in individual studies | 12 | Describe methods used for assessing risk of bias of individual studies (including specification of whether this was done at the study or outcome level), and how this information is to be used in any data synthesis.                                                                                      | 6                  |
| Summary measures                   | 13 | State the principal summary measures (e.g., risk ratio, difference in means).                                                                                                                                                                                                                               | 6                  |
| Synthesis of results               | 14 | Describe the methods of handling data and combining results of studies, if done, including measures of consistency (e.g., $I^2$ ) for each meta-analysis.                                                                                                                                                   | 6                  |

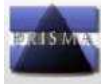

# PRISMA 2009 Checklist

Page 1 of 2

| Section/topic                                                                                                                              | #  | Checklist item                                                                                                                                                                                           | Reported on page #      |
|--------------------------------------------------------------------------------------------------------------------------------------------|----|----------------------------------------------------------------------------------------------------------------------------------------------------------------------------------------------------------|-------------------------|
| Risk of bias across studies                                                                                                                | 15 | Specify any assessment of risk of bias that may affect the cumulative evidence (e.g., publication bias, selective reporting within studies).                                                             | 6                       |
| Additional analyses                                                                                                                        | 16 | Describe methods of additional analyses (e.g., sensitivity or subgroup analyses, meta-regression), if done, indicating which were pre-specified.                                                         | 6                       |
| <b>RESULTS</b>                                                                                                                             |    |                                                                                                                                                                                                          |                         |
| Study selection                                                                                                                            | 17 | Give numbers of studies screened, assessed for eligibility, and included in the review, with reasons for exclusions at each stage, ideally with a flow diagram.                                          | 7<br>Figure 1           |
| Study characteristics                                                                                                                      | 18 | For each study, present characteristics for which data were extracted (e.g., study size, PICOS, follow-up period) and provide the citations.                                                             | Table 1-2               |
| Risk of bias within studies                                                                                                                | 19 | Present data on risk of bias of each study and, if available, any outcome level assessment (see item 12).                                                                                                | Table S1                |
| Results of individual studies                                                                                                              | 20 | For all outcomes considered (benefits or harms), present, for each study: (a) simple summary data for each intervention group (b) effect estimates and confidence intervals, ideally with a forest plot. | Table 3-6<br>Figure 1-2 |
| Synthesis of results                                                                                                                       | 21 | Present results of each meta-analysis done, including confidence intervals and measures of consistency.                                                                                                  | 8<br>Figure 1-2         |
| Risk of bias across studies                                                                                                                | 22 | Present results of any assessment of risk of bias across studies (see Item 15).                                                                                                                          | 9<br>Table S1           |
| Additional analysis                                                                                                                        | 23 | Give results of additional analyses, if done (e.g., sensitivity or subgroup analyses, meta-regression [see Item 16]).                                                                                    | 9<br>Figure S1-S6       |
| <b>DISCUSSION</b>                                                                                                                          |    |                                                                                                                                                                                                          |                         |
| Summary of evidence                                                                                                                        | 24 | Summarize the main findings including the strength of evidence for each main outcome; consider their relevance to key groups (e.g., healthcare providers, users, and policy makers).                     | 10                      |
| Limitations                                                                                                                                | 25 | Discuss limitations at study and outcome level (e.g., risk of bias), and at review-level (e.g., incomplete retrieval of identified research, reporting bias).                                            | 10                      |
| Conclusions                                                                                                                                | 26 | Provide a general interpretation of the results in the context of other evidence, and implications for future research.                                                                                  | 10-13                   |
| <b>FUNDING</b>                                                                                                                             |    |                                                                                                                                                                                                          |                         |
| For peer review only - <a href="http://bmjopen.bmj.com/site/about/guidelines.xhtml">http://bmjopen.bmj.com/site/about/guidelines.xhtml</a> |    |                                                                                                                                                                                                          |                         |



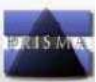

# PRISMA 2009 Checklist

1  
2  
3  
4  
5  
6  
7  
8  
9  
10  
11  
12  
13  
14  
15  
16  
17  
18  
19  
20  
21  
22  
23  
24  
25  
26  
27  
28  
29  
30  
31  
32  
33  
34  
35  
36  
37  
38  
39  
40  
41  
42  
43  
44  
45  
46  
47

|         |    |                                                                                                                                            |    |
|---------|----|--------------------------------------------------------------------------------------------------------------------------------------------|----|
| Funding | 27 | Describe sources of funding for the systematic review and other support (e.g., supply of data); role of funders for the systematic review. | 14 |
|---------|----|--------------------------------------------------------------------------------------------------------------------------------------------|----|

From: Moher D, Liberati A, Tetzlaff J, Altman DG, The PRISMA Group (2009). Preferred Reporting Items for Systematic Reviews and Meta-Analyses: The PRISMA Statement. PLoS Med 6(7): e1000097. doi:10.1371/journal.pmed1000097

For more information, visit: [www.prisma-statement.org](http://www.prisma-statement.org).

Page 2 of 2

For peer review only

# BMJ Open

## Effectiveness of the facility based maternal near-miss case reviews in improving maternal and newborn quality of care in low and middle income countries: systematic review

|                                 |                                                                                                                                                                                                                                                                                                                                                                                                                              |
|---------------------------------|------------------------------------------------------------------------------------------------------------------------------------------------------------------------------------------------------------------------------------------------------------------------------------------------------------------------------------------------------------------------------------------------------------------------------|
| Journal:                        | <i>BMJ Open</i>                                                                                                                                                                                                                                                                                                                                                                                                              |
| Manuscript ID                   | bmjopen-2017-019787.R1                                                                                                                                                                                                                                                                                                                                                                                                       |
| Article Type:                   | Research                                                                                                                                                                                                                                                                                                                                                                                                                     |
| Date Submitted by the Author:   | 18-Dec-2017                                                                                                                                                                                                                                                                                                                                                                                                                  |
| Complete List of Authors:       | Lazzerini, Marzia; Institute for Maternal and Child Health IRCCS Burlo Garofolo, WHO Collaborating Centre<br>Richardson, Sonia ; Institute for Maternal and Child Health IRCCS Burlo Garofolo, WHO Collaborating Centre<br>Ciardelli, Valentina ; Department of obstetrics and gynaecology, Bentivoglio Hospital<br>Erenbourg, Anna ; Institute for Maternal and Child Health IRCCS Burlo Garofolo, WHO Collaborating Centre |
| <b>Primary Subject Heading</b>: | Global health                                                                                                                                                                                                                                                                                                                                                                                                                |
| Secondary Subject Heading:      | Health services research                                                                                                                                                                                                                                                                                                                                                                                                     |
| Keywords:                       | Quality in health care < HEALTH SERVICES ADMINISTRATION & MANAGEMENT, Clinical audit < HEALTH SERVICES ADMINISTRATION & MANAGEMENT, Maternal medicine < OBSTETRICS                                                                                                                                                                                                                                                           |
|                                 |                                                                                                                                                                                                                                                                                                                                                                                                                              |

SCHOLARONE™  
Manuscripts

# Effectiveness of the facility based maternal near-miss case reviews in improving maternal and newborn quality of care in low and middle income countries: a systematic review

**Running title:** Effectiveness of NMCR on maternal and newborn quality of care in LMIC

Marzia Lazzerini,<sup>1</sup> Sonia Richardson,<sup>1</sup> Valentina Ciardelli,<sup>2</sup> Anna Erenbourg.<sup>1</sup>

<sup>1</sup> WHO Collaborating Centre for Maternal and Child Health, Institute for Maternal and Child Health IRCCS Burlo Garofolo, Via dell' Iстриa 65/1, 34137, Trieste, Italy.

<sup>2</sup> Department of obstetrics and gynaecology, Bentivoglio Hospital, Via Marconi, 35, 40010 Bentivoglio, Italy

## Authors' e-mail contacts for the online submission

ML: marzia.lazzerini@burlo.trieste.it

SR: sonia.richardson@burlo.trieste.it

VC: valenrico98@gmail.com

AE: anna.erenbourg@burlo.trieste.it

## Corresponding author

Marzia Lazzerini DTMH, MSc, PhD

WHO Collaborating Centre for Maternal and Child Health

Institute for Maternal and Child Health IRCCS Burlo Garofolo

Via dell'Iстриa 65/1, 34137, Trieste, ITALY

Tel: +39 040 3785 555

Fax: +39 040 3785 260

marzia.lazzerini@burlo.trieste.it

Abstract word count: 292

Text word count: 4263

## ABSTRACT

### Objectives

The maternal near-miss case review (NMCR) has been promoted by WHO as an approach to improve quality of care (QoC) at facility level. This systematic review synthesizes evidence on the effectiveness of the NMCR on QoC and maternal and perinatal health outcomes in low and middle-income countries (LMIC).

### Methods

Studies were searched for in six electronic databases (MEDLINE, Index Medicus, Web of Science, the Cochrane library, Embase, LILACS), with no language restrictions. Two authors independently screened papers and selected them for inclusion and independently extracted data. Maternal mortality was the primary outcome. Secondary outcomes included any outcome informing on any of the six dimensions of quality of care: efficacy, safety, efficiency, equity, accessibility and timely care, acceptability and patient-centered care.

### Results

Out of 24,822 papers retrieved, 17 studies from 11 countries were included. Maternal mortality measured before and after the implementation of the NMCR cycle significantly decreased (odds ratio (OR) 0.77, 95%CI 0.61 to 0.98, eight studies, 5,5573,043 women;  $I^2= 39\%$ ). A statistically significant reduction in the incidence of uterine rupture, post-partum haemorrhage, and maternal sepsis was observed in three out of six studies. Ten studies reporting on maternal care process all showed some significant improvement when measured against pre-defined standards. All studies reported that the NMCR resulted in some amelioration of the facility structure (physical structure, staffing, equipment, training, organization of care). Newborn outcomes were overall poorly reported; four studies showed no significant difference in perinatal mortality. Patient satisfaction and equity were also poorly reported.

### Conclusions

Policy makers may consider implementing the maternal NMCR cycle approach among strategies aiming at improving QoC and reducing maternal mortality and morbidity in LMIC. Future studies should better document the effectiveness of the NMCR cycle particularly on outcomes reflecting patient-centered care and cost-effectiveness.

### Article summary: strengths and limitations of this study

- The maternal near-miss case review (NMCR) approach has been used in different settings; however, so far no systematic review has ever reported on its effectiveness. The present review fills an existing gap in evidence synthesis by reporting latest evidence on the effectiveness of NMCR cycle as a type of criterion base audit in low and middle-income countries (LMIC).
- Findings of this review are limited by the paucity of existing scientific literature: despite the NMCR approach has been utilised in many countries, such as China, India, South Africa and the WHO European Region, scientific literature reporting on the NMCR effectiveness is relatively scarce.
- Despite the above described limitations, this review collected an appreciable number of studies reporting on the impact of the NMCR cycle from different regions worldwide, including Africa, Central Asia, South East Asia, Latin America and Caribbean- and adds as a new knowledge that this approach may be effective in reducing maternal mortality, and in improving quality of maternal and newborn health care at facility level.

### Keywords

Near miss case review; quality of care; maternal health; perinatal health; low and middle income countries

### Disclosure of interests

No competing interest

### List of abbreviations

CBAs= controlled before-and after studies

CCTs= controlled clinical trials

ITSs= and intermittent time series

LMIC = low and middle-income countries

NMCR= Near miss cases review

OR= odds ratio

QoC= Quality of care

RCTs= randomised controlled trials (RCTs)

UCBAs=uncontrolled before and after studies

WHO = World Health Organization

## BACKGROUND

Ensuring adequate quality of health care is a primary objective of the World Health Organization (WHO) Global Strategy for Women's, Children's and Adolescent's Health 2016-2030 (1,2). Quality in health care is recognized by WHO as essential for the health and well-being of the population, and as a basic aspect of human rights (2,3).

Among different approaches aiming at improving quality of care in maternity services, the maternal near-miss cases review (NMCR) approach was promoted by WHO and partners since 2004 within the strategy Beyond the Numbers (4). The facility-based individual NMCR cycle is defined as a type of criterion-based audit seeking to improve maternal and perinatal health care and outcomes by conducting a review, *g*, at hospital level, of the care provided to maternal near-miss cases (5). A maternal near miss case is defined as a woman who nearly died but survived a complication that occurred during pregnancy, childbirth or within six weeks after pregnancy (5).

In the last 20 years, NMCR have been promoted as an alternative way to audit case management, more acceptable for health workers than mortality audits, which have been in use for many years (4,5). As a matter of fact, in low mortality settings or at the health service level, the number of maternal deaths is usually insufficient or not representative enough to allow reliable policy guidance (4). Moreover, discussing cases of deaths may have legal implication and may be perceived as challenging by hospital staff (4). Near-miss cases occur more frequently than maternal deaths, their review can directly inform on both strengths and weakness in the process of care, and it is usually perceived by staff as easier to perform than mortality audits (5,6).

The objective of the NMCR cycle is to identify areas amenable of improving quality of care, and finding and implementing solutions to the problems identified. Actions for improving quality of care are proposed and agreed by hospital staff, and subsequently monitored to check their implementation (5). This bottom-up approach aims at ensuring local ownership and facilitating team-building dynamics (5). Beside reviewing clinical management the NMCR can cover other domains involved with delivery of care, including availability of essential equipment, staffing, training, policies and organization of services (5). According to the WHO guidance (5) patients' experience of care should be collected through interviews and taken into account in developing recommendations aiming at improving quality of care.

The NMCR approach has been used in different settings (5); however, so far no systematic review has ever reported on its effectiveness. The objective of this review is to systematically evaluate and synthesise the evidence on the effectiveness of the NMCR cycle on the quality of care and on

1  
2 maternal and perinatal health outcomes in low and middle-income countries (LMICs).  
3

## 4 5 **METHODS**

### 6 7 8 **Search strategy and eligibility criteria** 9

10  
11 In conducting this review we followed the guidelines reported in the PRISMA (Preferred Reporting  
12 Items for systematic reviews and meta-analyses) (7). A protocol including detailed methods of the  
13 review was developed before starting the review.  
14

15  
16 We searched up to September 2017 the following databases: MEDLINE through Pubmed (from  
17 1956); LILACS (no date restrictions); Global Index Medicus (no date restrictions); Science  
18 Citation Index Expanded (SCI-EXPANDED) through Web of Science (no date restrictions); Social  
19 Sciences Citation Index (SSCI) through Web of Science (no date restrictions); Cochrane library (no  
20 date restrictions); Embase through OVID (from 1996). The search strategy is reported in **Box 1**.  
21 Manual searches of reference lists were also performed. We did not apply any language  
22 restrictions.  
23  
24  
25  
26

27  
28 Studies were eligible for inclusion if they reported on the effectiveness (outcome) on maternal and  
29 perinatal health care (population) of the individual NMCR cycle at facility level (intervention), in a  
30 LMIC (setting), defined as for the World Bank definition at the time of the study (8). Given the  
31 paucity of randomised controlled trials (RCTs) on the subject, we also opted to include in this  
32 review in this review non randomized controlled clinical trials (CCTs), controlled before-and after  
33 studies (CBAs), uncontrolled before and after studies (UCBAs) and intermittent time series (ITSs).  
34 Qualitative studies were excluded. Both studies using the WHO definition of a maternal near-miss  
35 case published in year 2011 (9) or previous/locally adapted definitions, such as locally developed  
36 disease-specific definitions, were included. Studies reporting on interventions where the full audit  
37 cycle was implemented (ie including implementation of changes) were included, while studies only  
38 reporting descriptive findings of the case review (ie identifications of gaps in case management  
39 without developing and implementing recommendations) were not eligible. Abstracts and  
40 unpublished reports were also not eligible for inclusion.  
41  
42  
43  
44  
45  
46

47  
48 Maternal mortality was predefined as our primary outcome. Secondary outcomes included any  
49 outcome informing on any of the six dimensions of quality of care (10), namely: efficacy (eg  
50 maternal morbidity), safety (eg adverse events), efficiency (cost), equity (eg equitable care),  
51 accessibility and timely care (eg access to care), acceptability and patient-centered care (eg  
52 patients' satisfaction). Effectiveness on the quality of care is reported according the Donabedian  
53 model of quality improvement, which differentiate in between: i) outcomes of care (eg health  
54  
55  
56  
57  
58  
59  
60

1  
2 outcomes, costs, satisfaction), ii) process of care (eg diagnosis and treatment); iii) and  
3 inputs/structure (eg physical structure, staffing, equipment and supplies, training, policies and  
4 organization of care) (11).  
5  
6  
7

## 8 **Data collection and analysis**

9

10 Studies were selected for inclusion by two independent authors in two teams (VC and AE, ML and  
11 SR). Any disagreement was resolved through discussion. The full text of all eligible citations was  
12 examined in detail. Two authors (ML, SR) extracted data from included studies, using a pre-piloted  
13 data-extraction form. Disagreements were resolved by discussion between the two authors and  
14 consensus with a third author.  
15  
16  
17

18  
19 We extracted information regarding: study setting, design and duration; characteristics of the  
20 intervention; type of outcomes evaluated; effectiveness of the NMCR on the outcomes. For the  
21 study with ITS design we included in the meta-analysis of maternal mortality the first and the last  
22 time point reported. Data on effectiveness were extracted as crude numbers or percentages. Data  
23 on maternal mortality were extracted as disease-specific maternal mortality when case reviews  
24 focused only on specific diseases, and as total maternal mortality when case reviews included all  
25 major obstetric emergencies.  
26  
27  
28  
29

30  
31 When meta-analysis was possible and appropriate, for each outcome factor we generated a  
32 pooled odds ratio (OR) using the Mantel-Haenszel weighting method (12). Pooled data were  
33 presented in forest plots; data that could not be meta-analyzed was presented in tables and text.  
34 We tested the null hypothesis that all studies evaluate the same true effect by the Cochran's Q  
35 test, with two-sided  $p < 0.05$  considered statistically significant. The degree of heterogeneity  
36 between studies was assessed by visual inspection of the forest plots and I-squared (I<sup>2</sup>) statistic  
37 with its 95% confidence intervals, and interpreted according to the Cochrane manual (12).  
38  
39  
40  
41  
42

43 The Cochrane 'Risk of bias' tool modified with the Cochrane Effective Practice and Organization of  
44 Care Group (EPoC) criteria for ITSs (12) was used to assess the risk of bias in included studies.  
45 We aimed at performing the following sensitivity analyses: i) removing the studies with high risk of  
46 bias; ii) removing studies including less than 300 cases and less than 30 events (ie cases of  
47 maternal death or perinatal death). We performed a subgroup analysis exploring the effect of  
48 NMCR in low income countries (defined as for the World Bank definition at the time of the study  
49 (8)) compared to middle income countries.  
50  
51  
52  
53  
54  
55  
56  
57  
58  
59  
60



## RESULTS

### Characteristics of the studies

The search yielded overall 24,822 records (**Figure 1**). Overall 17 papers (13-29) from Africa (Ghana, Ethiopia Malawi, Nigeria, Tanzania, Uganda), Europe and Central Asia (Kazakhstan, Moldova), South East Asia (Malaysia, Vietnam) and Latin America and Caribbean (Jamaica) met the inclusion criteria.

Characteristics of the study settings and design are summarized in **Table 1**. All except one study (23) were published during the last 15 years. Two papers referred to the same experience (20, 21); findings from these studies are jointly reported in the tables, and we used the most recent reference (20) to identify them. All studies were uncontrolled before and after-studies (UCBAs), describing the effectiveness of the NMCR cycle with a before and after analysis, except for two studies with ITS design (13, 22). Studies duration ranged from a minimum of 6 months (27) to a maximum of 26 months (29). Ten studies were held in an urban setting (13-17,19,20,25,28,29), three in a rural setting (22,24,27), and three in a mixed setting (18,23,26). One study was multi-centered (Ghana and Jamaica) (29). Among the 16 experiences reported, nine were of large size: one very large study in Malawi included 73 facilities in three districts (26); another three studies in Malawi enrolled respectively 29 and 13 facilities of different level and type (22,27), while one was conducted in one referral hospital plus several (number not further specified) health centres (24); a study in Ethiopia involved 10 public hospitals (17); studies in Kazakhstan, Vietnam, Ghana, Jamaica and Moldova involved six, five, four and three hospitals respectively (20,23,29,18). The remaining seven studies were single-center studies and took place in one teaching/tertiary level care hospital each.

Characteristics of the intervention are summarized in **Table 2**. In about half of studies cases were audited prospectively (15,17,18,20,22,24-26), while in the other studies audits were either conducted retrospectively (12,13,27), or retrospectively in a first phase then prospectively in the second phase (16,19,23,28,29). While in all cases the internal staff within the facility was involved in developing the recommendations, studies differed by who performed the case reviews: in most experiences audits were conducted by internal staff within the facility/ies, with the exception of four cases where a study investigator/physician audited the cases against pre-defined criteria and later presented it to hospital staff (13,19,25,29) and two cases where this information was not specified (15,16). Type of obstetric complications selected for audit included: severe pre-eclampsia/eclampsia (13,16,19,22,23,25-29), post-partum haemorrhage (13,20,22,23,25-27,29), obstructed labour (14,15,23,26,27,29), uterine rupture (24,25,29), infections (23,25,27),

1 complications of abortion (27). Five studies focused on one complication only (14-16,24,28) while  
2 in all other studies more than one condition was audited. In three studies cases of maternal  
3 mortality were audited together with cases of near-miss (17,22,26). The criteria for case selection  
4 was “all cases occurring in the study period”, except in one experience in Malawi where cases of  
5 particular educational interest were selected (24), and a study in Moldova were, despite no pre-  
6 defined criteria, it was observed that cases “more likely to lead to praises for the maternity team”  
7 were selected (18). Number of total cases audited in each study ranged widely, from 30 cases (18)  
8 to 2568 cases (17).

15 Only in four experiences women were interviewed (14,15,18,20), but in one of them this was  
16 explicitly merely for recording bureaucratic details (15), rather than for the purpose of collecting  
17 women views and perspectives on quality of care received. All studies associated the audits with  
18 the development or implementation of standards of care (used also in most cases to perform the  
19 audits), while few studies also associated additional interventions for the hospital staff, such as  
20 development/dissemination of guidelines, and training on case management (13,15, 23).

26 As reported in **Table S1**, types of outcomes evaluated in the studies reported mostly on two  
27 dimensions of quality of care (10): effectiveness and accessibility and timely care. Outcomes  
28 related to the other dimension of quality of care, such as patient centrality and acceptability (eg  
29 patient satisfaction), efficiency and equity, safety (eg rate of adverse events, incident reporting)  
30 were not explored, with the exception of one study in Kazakhstan reporting on improved patients  
31 satisfaction (20) and one in Moldova reporting improved attitude towards patients (18).

## 36 **Effectiveness of the NMCR cycle**

### 39 ***Effectiveness on health outcomes***

42 In a meta-analysis including eight studies maternal mortality measured before and after the  
43 implementation of the NMCR cycle significantly decreased (OR 0.77, 95%CI 0.61 to 0.98,  
44 5,5573,043 women, **Figure 2**), with relatively low heterogeneity between studies ( $I^2= 39\%$ ). An  
45 additional study from Uganda reported to have observed a reduction in maternal mortality, but data  
46 were not further made explicit (15).

50 Three out of six studies reported a statistically significant reduction in the incidence of the following  
51 preventable obstetric complications: uterine rupture, major post-partum haemorrhage, and  
52 maternal sepsis (**Table 3**).

56 Newborn outcomes were overall poorly reported. Of five studies documenting perinatal mortality,

fours could be included in the meta-analysis, showing no significant differences in perinatal deaths in the before and after period (OR 0.92, 95%CI 0.65, 1.30, **Figure 3**) with low heterogeneity between studies ( $I^2= 40\%$ ). The fifth study (14), conducted in Uganda, reported a significant reduction in the incidence of a combined outcome including perinatal severe morbidities, deaths and stillbirths (**Table 3**). Only one study reported on number of newborns admitted to ICU, without statistical difference in the before and after NCMR period (15). Another single study reported on Apgar score birth weight, without changes in the before and after period (16).

One study reported increased patient satisfaction after the implementation of the NMRC cycle (20).

### ***Effectiveness on process outcomes***

The effectiveness of the NMCR on the process of care is synthesized in **Table 3**. Ten studies reported on the process of care when measured quantitatively against pre-defined standards and all showed some significant improvements (13-16,19,23,25,27,28,29). Six studies reported other findings, such as improved case documentation, referral, use of partograph, monitoring and teamwork (14,17,18,20,22,26).

### ***Effectiveness on structure outcomes***

Effectiveness on the structure is detailed in **Table 4**. All studies reported some improvements in one or more domains. Overall most frequent changes relate to: purchasing of essential equipment and supplies; additional training, monitoring and supervision; policies and organization of care including reorganisation of staff and their duties, implementation of systems aiming at standardising case management through disseminating of guidelines, checklists and monitoring forms, better coordination among different services.

### ***Risk of bias and other analyses***

All studies were rated as a high risk of bias based on the Cochrane and EPOC criteria (**Table S2**), mostly due to the study design (NCBA or ITS studies).

The sensitivity analysis showed that when studies with a very small sample size were excluded, the effect of the NMCR on maternal mortality becomes stronger than when all studies were included (OR 0.71, 95%CI 0.55 to 0.90, three studies  $I^2=86\%$  **Figure S1**). The effect of NMCR on perinatal mortality did not significantly changed in the sensitivity analysis (**Figure S2**).

Thirteen studies were held in low-income countries (13-15,17,19,22-27,28,29), two in upper middle-income countries (16,20), and one in a lower middle-income country (18) (**Table S3**). In the subgroup analysis, the effect of NMCR on maternal mortality was statistically significant in low

1  
2 income countries (R 0.77, 95%CI 0.60 to 0.98, 7 studies), while only one small study could be  
3 included in the category of middle income countries, without statistical significance (**Figure S3**).  
4 The effect of NMCR on perinatal mortality was not affected by subgroup analysis (**Figure S4**).  
5  
6 Funnel plots did not suggest publication bias (**Figure S5 and S6**).  
7

## 8 9 **DISCUSSION**

10  
11  
12 This review suggests that the facility based individual maternal NMCR cycle may be an effective  
13 strategy for reducing maternal mortality in high burden countries, and for improving overall quality  
14 of maternal care in LMIC. Results of a pooled analysis of findings from eight studies showed that  
15 the NMCR cycle significantly reduced maternal mortality (OR 0.77, 95%CI 0.61 to 0.98, **Figure 2**),  
16 with relatively low heterogeneity of results ( $I^2=39%$ ). Three out of six studies reported a significant  
17 reduction in the incidence of preventable obstetric complications such as uterine rupture, major  
18 post-partum haemorrhage, and maternal sepsis. Out of ten studies reporting on the process of  
19 care when measured against pre-defined standards all showed some statistically significant  
20 improvement. Additionally, in all studies the implementation of the NMCR cycle resulted in some  
21 amelioration in the structure of the hospital, such as an increased availability of essential  
22 equipment and supplies, additional training, monitoring and supervision, and the implementation of  
23 new policies and better organization of services.  
24  
25  
26  
27  
28  
29  
30

31  
32 Previous systematic reviews had observed a benefit of criterion-base audits in improving the  
33 quality of obstetric care (30-32). However, a review on the effectiveness of criterion-base audits in  
34 LMIC published some years ago concluded that, despite criterion-base audits being increasingly  
35 used, few studies had reported on their effectiveness (33). The present review retrieved all latest  
36 evidence on the effectiveness of NMCR cycle as a type of criterion base audit, synthesized studies  
37 from LMIC in different geographical regions- including Africa, Central Asia, South East Asia, Latin  
38 America and Caribbean- and adds as a new knowledge that this approach may be effective in  
39 reducing maternal mortality and in improving quality of health care provided.  
40  
41  
42  
43  
44

45 Findings of this review are limited by the paucity of existing scientific literature: the NMCR  
46 approach has been utilized in many more countries than what could be included in this reviews,  
47 such as China (34), India (35), South Africa (36), and the WHO European Region (37-41), but  
48 scientific literature reporting on the NMCR effectiveness in these countries could not be retrieved.  
49 Secondly, all included studies had an UCBA or ITS design, thus being exposed to a high risk of  
50 bias (although most studies checked for potential confounding factors, such as the case mix in the  
51 before and after phase). Several studies had a low sample size which did not allow for detecting a  
52 statistically significant difference in rare outcomes such as maternal or perinatal mortality (18,20),  
53  
54  
55  
56  
57

1  
2 Despite these limitations, this review collected an appreciable number of studies, including also  
3 some very large studies (17,22,26,27), reporting on the impact of the NMCR cycle from different  
4 regions worldwide, and in most experiences significant gains were observed. In some cases, a  
5 significant benefit in the study outcomes could not be detected because in-hospital maternal  
6 mortality was too low or because standards of care were already good at the baseline (13,23,27 .  
7  
8 Ideally, it will be advisable to perform large multicenter RCTs to properly document NMCR  
9 effectiveness. However, in practice conducting a RCT on criterion based audit alone may be  
10 challenging, and may even be perceived as unethical, if no appropriate comparison is chosen. This  
11 is because in current practice criterion based audits are already one of the recommended  
12 strategies to improve quality of care promoted by many agencies and bodies, such as the National  
13 Institute for Clinical Excellence (NICE) (42). Notably, the review of “near-miss” cases is already  
14 recommended by WHO as a “key action to eliminate avoidable maternal and perinatal mortality  
15 and morbidity and improve the quality of care” (43) and as such it is already implemented in  
16 several countries.  
17  
18  
19  
20  
21  
22  
23

24 The audit of maternal near miss cases is an approach also utilized in several high-income  
25 settings: UK has a well-established programme of confidential enquiries into maternal deaths and a  
26 national system for research on maternal near-miss-the UK Obstetric Surveillance System  
27 (UKOSS) (44,45); New Zealand established a national system for severe maternal morbidity  
28 review (46); several countries within the International Network of Obstetric Survey Systems  
29 (INOSS) are collecting data on severe maternal morbidities for study purposes (47), while other  
30 countries such as Italy (ITOSS) are starting implementing near-miss audits (48,49). Although there  
31 are some differences in the type of interventions applied (eg not all of these approaches are facility  
32 based), still the existence of these large networks on maternal near miss case reviews and the  
33 amount of resources devoted to them somehow testify the importance recognized in reviewing  
34 near miss cases.  
35  
36  
37  
38  
39  
40  
41

42 In the future, rather than investing resources in exploring whether near miss audits or criterion  
43 base audits in general are overall effective, it will be more interesting to explore which  
44 characteristics make them effective and sustainable. Available literature synthesised in this review  
45 does not allow for directly comparing the effectiveness of different methodologies on how to  
46 perform audits in practice, but at least it does provide some useful starting point for discussion and  
47 for future research. First, with regards to the number of cases audited, this varied largely in the  
48 included studies from a minimum of less than 10 cases per year (18,20) to a maximum of several  
49 hundred cases in few months (14,29), with a third approach consisting in performing a large  
50 retrospective review of past cases at the baseline, and then collecting fewer new cases  
51 prospectively. When many cases were reviewed, this allowed for an in depth description of the  
52  
53  
54  
55  
56  
57  
58  
59  
60

1  
2 gaps in care. However, the analysis of a large number of cases does not necessarily ensure the  
3 development of good recommendations for quality improvement, neither their implementation.  
4 Additionally, the sustainability of auditing on a large number of cases, outside a research setting, is  
5 questionable. Studies included in this review suggest that even the periodic review of few cases  
6 may help identifying gaps in routine care, developing SMART recommendations (ie Specific,  
7 Measurable, Achievable, Realistic, Time-bound (50)), and improving quality of care significantly  
8 (18,20). This is the approach also recommended by WHO (5).  
9  
10  
11  
12

13  
14 Secondly, studies included in this review revealed that most experiences of implementation of  
15 NMCR cycles were externally supported, either by the WHO, academia, and/or other development  
16 partners (15,18,20-24,26-28). This is in line with other existing literature (,51,52) highlighting that  
17 in particular the second part of the audit cycle (ie developing recommendations, implementing  
18 them, checking on progress) is in general problematic and usually less well conducted compared  
19 to the first part of the audit cycle. The attitude to openly discuss cases within a multidisciplinary  
20 team and agreeing solutions was described as challenging in different settings, especially for mid-  
21 level staff (midwives, nurses) who may not be used to voice their views in the presence of doctors  
22 and managers (18,20). Hospital staff, managers included, often do not receive any formal training  
23 in quality improvement methods or any guidance in correctly performing an audit cycle. The need  
24 for ensuring sustained external support, and for establishing a functional quality assurance  
25 mechanism are recognised by WHO crucial for ensuring an effective NMCR implementation (5).  
26  
27  
28  
29  
30  
31  
32

33  
34 Thirdly, although having a single person appointed to perform the case-review - as performed in  
35 some studies included in this review (18,10,25,29)- may increase feasibility, this actually largely  
36 reduces ownership of the process, together with minimizing occasions for discussion and team  
37 building among staff. Studies noted that involvement of all health care providers in the audit  
38 process promoted successful implementation, ownership and sustainability of the process  
39 (14,20,28). The involvement of mid level staff such as nurses and midwives was reported to result  
40 in improved staff autonomy and team work (14,21,27). Some studies observed that participation of  
41 the senior management promoted the implementation of recommendations that required allocation  
42 of resources and changes in policies and organisation of care (26,28). Currently the WHO  
43 approach (5) recommends the NMCR to be performed by the staff who managed the cases,  
44 including nurses, midwives, and any other staff directly or indirectly involved in case management.  
45  
46  
47  
48  
49  
50

51  
52 Fourthly, the patient's experience of care was assessed only in very few of the existing studies,  
53 and yet not fully taken into account. In the last few years, WHO has given increasing importance  
54 to patient's experience of care (1). Listening to women's views may provide important information,  
55 as testified by studies in Brazil, Rwanda and UK (53-55) and by a study in Iran where women's  
56  
57  
58  
59  
60

1  
2 views were successfully used to improve quality of care (56). Currently WHO recommends to  
3 always interview women and their families and to use their inputs for improving care (5).  
4  
5

6 Finally, as pointed out by authors of the included studies, interventions aiming at improving quality  
7 of care without strengthening the health systems and improving community awareness may have  
8 minimal success (15,22). A study in Malawi reported that availability of essential supplies, such as  
9 blood for transfusions, remained low even after the NMCR due to health system failures and this  
10 clearly was a barrier for improving case management (22). Qualitative findings collected through  
11 focus group in a study in Uganda (15) pointed out among issues that may have hampered the  
12 effectiveness of NMCR health facility factors such as: stock-out of essential supplies, shortage of  
13 human resources, lack of task allocation, inadequate supervision. However, in most studies, even  
14 if the number of staff and available resources remained stable in the before and after phase, as a  
15 result of the audit there was a reorganization of staff activities, such as better specification of roles  
16 and responsibilities, task shifting, and improved communication (14,16,17,20,28).  
17  
18  
19  
20  
21  
22  
23

24 Cost of the NMCR approach in improving health outcomes and quality of care was not formally  
25 evaluated in the retrieved studies. However, several papers stated that the NMCR was an  
26 inexpensive and simple intervention, requiring little technology (24,26-28). A study involving 12  
27 health centres in Malawi reported that each audit meeting cost about 150 US \$, including foods  
28 and transport of participants to the District Hospital (27). Another study in Uganda stated that “the  
29 audit process had challenged the assumption that all quality improvements need to be externally  
30 provided and are expensive” (28). These findings are in line with a systematic review of barriers  
31 and facilitators for effective NMCR implementation, reporting that a relatively low budget is needed  
32 to facilitate activities (37). In some experiences, the NMCR improved use or availability of existing  
33 economic resources: in Malawi, it “promoted a wiser allocation of resources for maternity care at  
34 the district level” (27); in Uganda a fundraising committee was established to raise funds for drugs  
35 and equipment needed according to the recommendations (28).  
36  
37  
38  
39  
40  
41  
42  
43  
44

## 45 CONCLUSIONS

### 46 *Implication for policy and research*

47  
48  
49  
50  
51 Among other strategies to reduce maternal mortality and morbidity and for improving the quality of  
52 maternal and perinatal care, policy makers may consider the implementation of the maternal  
53 NMCR cycle approach.  
54  
55  
56  
57  
58  
59  
60

1  
2 Researchers should aim at generating more evidence on how to effectively implement the NMCR  
3 cycle, how to improve its impact on newborn outcomes and on outcomes reflecting patients'  
4 centrality (such as patients' satisfaction and/or perception of quality of care received), together with  
5 documenting the cost effectiveness of the NMCR approach.  
6  
7  
8  
9

### 10 **Funding**

11 This review was funded by a grant from the GREAT Network, Canadian Institutes of Health  
12 Research, St. Michael's Hospital, Toronto.  
13  
14  
15

### 16 **Conflict of interest**

17 None  
18  
19  
20  
21

### 22 **Role of authors**

23 ML conceived the papers, screened the study, extracted data, drafted the paper and finalised the  
24 paper. SR, VC, AE screened the study, extracted data and revised the first draft.  
25  
26  
27

### 28 **Data Sharing statement**

29 All details of the analyses conducted are provided within the manuscript  
30  
31  
32  
33  
34  
35  
36  
37  
38  
39  
40  
41  
42  
43  
44  
45  
46  
47  
48  
49  
50  
51  
52  
53  
54  
55  
56  
57  
58  
59  
60



## REFERENCES

1. Tunçalp O, Were WM, MacLennan C, Oladapo OT, Gülmezoglu AM, Bahl R, Daelmans B, Mathai M, Say L, Kristensen F, Temmerman M, Bustreo F. Quality of care for pregnant women and newborns—the WHO vision. *BJOG*. 2015 ;122:1045-9.
2. World Health Organization. Global Strategy for Women's, Children's and Adolescent's Health 2016-2030 Available at <http://www.who.int/life-course/partners/global-strategy/global-strategy-2016-2030/en/> (accessed Sept 15, 2017)
3. World Health Organization (WHO). The prevention and elimination of disrespect and abuse during facility-based childbirth. World Health Organization, Geneva, 2014. Available at [http://apps.who.int/iris/bitstream/10665/134588/1/WHO\\_RHR\\_14.23\\_eng.pdf?ua=1&ua=1](http://apps.who.int/iris/bitstream/10665/134588/1/WHO_RHR_14.23_eng.pdf?ua=1&ua=1) (accessed Sept 15, 2017)
4. World Health Organization. Beyond the numbers: Reviewing maternal deaths and complications to make pregnancy safer. World Health Organization, Geneva, 2004. Available at <http://whqlibdoc.who.int/publications/2004/9241591838.pdf?ua=1> (accessed Sept 15, 2017)
5. World Health Organization. Regional Office for Europe. Conducting a maternal near-miss case review cycle at the hospital level” manual with practical tools. Available at <http://www.euro.who.int/en/health-topics/Life-stages/maternal-and-newborn-health/publications/2016/conducting-a-maternal-near-miss-case-review-cycle-at-hospital-level-2016> (accessed Sept 15, 2017)
6. Tunçalp O, Hindin MJ, Souza JP, Chou D, Say L. The prevalence of maternal near miss: a systematic review. *BJOG*. 2012 ;119:653-61
7. Liberati A, Altman DG, Tetzlaff J, Mulrow C, Gotzsche PC, Ioannidis JP et al. (2009) The PRISMA statement for reporting systematic reviews and meta-analyses of studies that evaluate health care interventions: explanation and elaboration. *PLoS Med* 6: e1000100.
8. The World Bank, Country and Lending Groups. (2014) Historical classification. Available: <https://datahelpdesk.worldbank.org/knowledgebase/articles/906519> (Accessed Sept 15, 2017).
9. World Health Organization 2011. Evaluating the quality of care for severe pregnancy complications: the WHO near-miss approach for maternal health. World Health Organization, Geneva, 2011
10. Institute of Medicine. Crossing the Quality Chasm. Washington, DC: National Academy Press, 2001. Available at <http://www.nap.edu/openbook.php?isbn=0309072808>. Accessed on Sept 15, 2017
11. Donabedian A. The quality of care: how can it be assessed? *JAMA* 1988; 260: 1743-1748.
12. Higgins JPT, Green S (editors). *Cochrane Handbook for Systematic Reviews of Interventions* Version 5.1.0 [updated March 2011]. The Cochrane Collaboration, 2011. Available from <http://handbook.cochrane.org>. (Accessed Sept 15, 2017)
13. Lumala A, Sekweyama P, Abaasa A, Lwanga H, Byaruhanga R. Assessment of quality of care among in-patients with postpartum haemorrhage and severe pre-eclampsia at st. Francis hospital

- 1 nsambya: a criteria-based audit. *BMC Pregnancy Childbirth*.2017 ;17:29. doi: 10.1186/s12884-016-  
2 1219-y.  
3  
4  
5 14. Mgaya AH, Kidanto HL, Nystrom L, Essén B. Improving Standards of Care in Obstructed Labour: A  
6 Criteria-Based Audit at a Referral Hospital in a Low-Resource Setting in Tanzania. *PLoS One*. 2016  
7 ;11:e0166619. doi: 10.1371/journal.pone.0166619.  
8  
9 15. Kayiga H, Ajeani J, Kiondo P, Kaye DK. Improving the quality of obstetric care for women with  
10 obstructed labour in the national referral hospital in Uganda: lessons learnt from criteria based audit.  
11 *BMC Pregnancy Childbirth*. 2016 ;16:152.  
12  
13 16. Mohd Azri MS, Edahayati AT, Kunasegaran K. Audit on management of eclampsia at Sultan Abdul  
14 Halim Hospital. *Med J Malaysia*. 2015 ;70:142-7.  
15  
16 17. Gebrehiwot Y, Tewolde BT. Improving maternity care in Ethiopia through facility based review of  
17 maternal deaths and near misses. *Int J Gynaecol Obstet*. 2014 ;127 Suppl 1:S29-34.  
18  
19 18. Baltag V, Filippi V, Bacci A. Putting theory into practice: the introduction of obstetric near-miss case  
20 reviews in the Republic of Moldova. *Int J Qual Health Care*. 2012 ;24:182-8  
21  
22 19. Kidanto HL, Wangwe P, Kilewo CD, Nystrom L, Lindmark G. Improved quality of management of  
23 eclampsia patients through criteria based audit at Muhimbili National Hospital, Dar es Salaam,  
24 Tanzania. *Bridging the quality gap. BMC Pregnancy Childbirth*. 2012 ;12:134.  
25  
26 20. Sukhanberdiyev K, Ayazbekov A, Issina A, Abuova G, Hodorocea S, Bacci A. Initial experience of  
27 Near Miss Case Review: improving the management of haemorrhage. *Entre Nous* 2011: 74; 18-19.  
28  
29 21. Hodorocea s. Piloting near miss case reviews in Kazakhstan: improving quality of maternal care.  
30 *Entre Nous* 2010: 70; 28-29.  
31  
32 22. van den Akker T, van Rhenen J, Mwangomba B, Lommerse K, Vinkhumbo S, van Roosmalen J.  
33 Reduction of severe acute maternal morbidity and maternal mortality in Thyolo District, Malawi: the  
34 impact of obstetric audit. *PLoS One*. 2011;6:e20776. doi: 10.1371/journal.pone.0020776. Epub 2011  
35 Jun 3.  
36  
37 23. Bailey PE, Binh HT, Bang HT. Promoting accountability in obstetric care: use of criteria-based audit  
38 in Viet Nam. *Glob Public Health*. 2010;5:62-74.  
39  
40 24. van den Akker T, Mwangomba B, Irlam J, van Roosmalen J. Using audits to reduce the incidence of  
41 uterine rupture in a Malawian district hospital. *Int J Gynaecol Obstet*. 2009;107:289-94. doi:  
42 10.1016/j.ijgo.2009.09.005. Epub 2009 Oct 28.  
43  
44 25. Hunyinbo KI, Fawole AO, Sotiloye OS, Otolorin EO. Evaluation of criteria-based clinical audit in  
45 improving quality of obstetric care in a developing country hospital. *Afr J Reprod Health*. 2008  
46 ;12:59-70  
47  
48 26. Kongnyuy EJ, Leigh B, van den Broek N. Effect of audit and feedback on the availability, utilisation  
49 and quality of emergency obstetric care in three districts in Malawi. *Women Birth*. 2008 ;21:149-55.  
50  
51 27. Kongnyuy EJ, Mlava G, van den Broek N. Criteria-based audit to improve a district referral system in  
52 Malawi: a pilot study. *BMC Health Serv Res*. 2008 ;8:190.  
53  
54 28. Weeks AD, Alia G, Ononge S, Otolorin EO, Mirembe FM. A criteria-based audit of the management  
55 of severe pre-eclampsia in Kampala, Uganda. *Int J Gynaecol Obstet*. 2005 ;91:292-7; discussion  
56 283-4.  
57  
58  
59  
60

- 1  
2  
3  
4  
5  
6  
7  
8  
9  
10  
11  
12  
13  
14  
15  
16  
17  
18  
19  
20  
21  
22  
23  
24  
25  
26  
27  
28  
29  
30  
31  
32  
33  
34  
35  
36  
37  
38  
39  
40  
41  
42  
43  
44  
45  
46  
47  
48  
49  
50  
51  
52  
53  
54  
55  
56  
57  
58  
59  
60
29. Wagaarachchi PT, Graham WJ, Penney GC, McCaw-Binns A, Yeboah Antwi K, Hall MH. Holding up a mirror: changing obstetric practice through criterion-based clinical audit in developing countries. *Int J Gynaecol Obstet.* 2001 ;74:119-30
  30. Ivers N, Jamtvedt G, Flottorp S, Young JM, Odgaard-Jensen J, French SD, O'Brien MA, Johansen M, Grimshaw J, Oxman AD. Audit and feedback: effects on professional practice and healthcare outcomes. *Cochrane Database Syst Rev.* 2012 ;(6):CD000259.
  31. Pantoja T, Opiyo N, Lewin S, Paulsen E, Ciapponi A, Wiysonge CS, Herrera CA, Rada G, Peñaloza B, Dudley L, Gagnon MP, Garcia Marti S, Oxman AD. Implementation strategies for health systems in low-income countries: an overview of systematic reviews. *Cochrane Database Syst Rev.* 2017 ;9:CD011086. doi: 10.1002/14651858.CD011086.pub2.
  32. Kongnyuy EJ, Uthman OA. Use of criterion-based clinical audit to improve the quality of obstetric care: A systematic review. *Acta Obstet Gynecol Scand.*2009;88:873-81
  33. Pirkle CM, Dumont A, Zunzunegui MV. Criterion-based clinical audit to assess quality of obstetrical care in low- and middle-income countries: a systematic review. *Int J Qual Health Care.* 2011 ;23:456-63.
  34. Wu J, Song B, Zheng R..Evaluating the effectiveness of maternal near-miss audit in China. *International Journal of Gynecology and Obstetrics 2015 Conference: 21st FIGO World Congress of Gynecology and Obstetrics.* Vancouver, BC Canada. Conference Start: 20151004. Conference End: 20151009. Conference Publication: (var.pagings). 131
  35. Lewis G. Emerging lessons from the FIGO LOGIC initiative on maternal death and near-miss reviews. *Int J Gynaecol Obstet.* 2014 ;127 Suppl 1:S17-20.
  36. Heitkamp,A.; Vollmer,L.; Van Den Akker,T.; Gebhardt,S.; Van Roosmalen,J.; Theron,G. Severe acute maternal morbidity (SAMM) in metro east, western cape, South Africa: "Every human being has the right to live, every child needs a mother, mothers should not die because of their pregnancy."How can we improve the quality of care in the existing health system? *International Journal of Gynecology and Obstetrics 2015. Conference: 21st FIGO World Congress of Gynecology and Obstetrics.* Vancouver, BC Canada. Conference Start: 20151004. Conference End: 20151009. Conference Publication: (var.pagings). 131
  37. Lazzarini M, Ciuch M, Covi B, Rusconi S, Bacci A. Facilitators and barriers to the effective implementation of the maternal near-miss case reviews in low and middle income countries: systematic review (submitted for publication)
  38. Bacci A, Lewis G, Baltag V, Betrán AP. The introduction of confidential enquiries into maternal deaths and near-miss case reviews in the WHO European Region. *Reprod Health Matters.* 2007 ;15:145-52.
  39. World Health Organization. Regional Office for Europe. Multi-Country review meeting on maternal mortality and morbidity audit "Beyond the Numbers", Report of a WHO meeting, Charvak, Uzbekistan 14–17 June 2010. Copenhagen, WHO Regional Office for Europe, 2010. Available at <http://www.euro.who.int/en/health-topics/Life-stages/maternal-and-newborn-health/publications/2010/multi-country-review-meeting-on-maternal-mortality-and-morbidity-audit-beyond-the-numbers,-report-of-a-who-meeting,-charvak,-uzbekistan-1417-june-2010> (accessed Sept 8, 2017).

- 1  
2 40. World Health Organization. Regional Office for Europe. The impact of implementation of 'Beyond the  
3 numbers' approach in improving maternal and perinatal health. 29-30 April 2014, Bishkek,  
4 Kyrgyzstan. Copenhagen, WHO Regional Office for Europe, 2014. Available at  
5 [http://www.euro.who.int/en/media-centre/events/events/2014/04/the-impact-of-implementation-of-](http://www.euro.who.int/en/media-centre/events/events/2014/04/the-impact-of-implementation-of-beyond-the-numbers-approach-in-improving-maternal-and-perinatal-health)  
6 [beyond-the-numbers-approach-in-improving-maternal-and-perinatal-health](http://www.euro.who.int/en/media-centre/events/events/2014/04/the-impact-of-implementation-of-beyond-the-numbers-approach-in-improving-maternal-and-perinatal-health) (accessed Sep 8, 2017).  
7  
8
- 9 41. WHO Regional Office for Europe Making Pregnancy Safer in Uzbekistan. Maternal mortality and  
10 morbidity audit Activities Report 2002-2008. Available at  
11 [http://www.euro.who.int/\\_data/assets/pdf\\_file/0004/98797/MPS\\_UZB.pdf](http://www.euro.who.int/_data/assets/pdf_file/0004/98797/MPS_UZB.pdf) (accessed Sept 8, 2017)  
12
- 13 42. National Institute for Clinical Excellence (NICE). Principles for best practice in clinical audit.  
14 Abingdon, Berks: Radcliffe Medical Press; 2002 ([http://www.uhbristol.nhs.uk/files/nhs-](http://www.uhbristol.nhs.uk/files/nhs-ubht/best_practice_clinical_audit.pdf)  
15 [ubht/best\\_practice\\_clinical\\_audit.pdf](http://www.uhbristol.nhs.uk/files/nhs-ubht/best_practice_clinical_audit.pdf) ( accessed Sept 22, 2017)  
16
- 17 43. World Health Organization Regional Office for Europe. Action plan for sexual and reproductive  
18 health: towards achieving the 2030 Agenda for Sustainable Development in Europe – leaving no one  
19 behind. Copenhagen: World Health Organization Regional Office for Europe; 2016. Available at  
20 [http://www.euro.who.int/\\_data/assets/pdf\\_file/0018/314532/66wd13e\\_SRHActionPlan\\_160524.pdf](http://www.euro.who.int/_data/assets/pdf_file/0018/314532/66wd13e_SRHActionPlan_160524.pdf) (  
21 accessed Sept 22, 2017)  
22
- 23 44. Knight M, Lewis G, Acosta CD, Kurinczuk JJ. Maternal near-miss case reviews: the UK approach.  
24 BJOG. 2014 ;121 Suppl 4:112-6.  
25
- 26 45. Knight M, Acosta C, Brocklehurst P, Cheshire A, Fitzpatrick K, Hinton L, Jokinen M, Kemp B,  
27 Kurinczuk JJ, Lewis G, Lindquist A, Locock L, Nair M, Patel N, Quigley M, Ridge D, Rivero-Arias O,  
28 Sellers S, Shah A; on behalf of the UKNeS coapplicant group. Beyond maternal death: improving the  
29 quality of maternal care through national studies of 'near-miss' maternal morbidity. Southampton  
30 (UK):NIHR Journals Library; 2016 Jun.  
31
- 32 46. MacDonald EJ, Geller SE, Lawton B. Establishment of a national severe maternal morbidity  
33 preventability review in New Zealand. Int J Gynaecol Obstet. 2016;135:120-3.  
34
- 35 47. Knight M; INOSS. The International Network of Obstetric Survey Systems (INOSS): benefits of multi-  
36 country studies of severe and uncommon maternal morbidities. Acta Obstet Gynecol Scand. 2014  
37 ;93:127-31.  
38
- 39 48. Donati S, Maraschini A, Buoncristinao M, Bucciarelli M, Marani A. Grave morbosità materna da  
40 emorragia del post partum: aspetti metodologici del progetto coordinato dall'Italia Obstetrics  
41 Surveillance System. Rapporto Osservasalute 2014. Stato di salute e qualità dell'assistenza nelle  
42 regioni italiane. Milano: Prex, 2014. p. 260-1.  
43
- 44 49. Donati S, Maraschini A, Buoncristiano M, Lega I, Bucciarelli M, Andreozzi S, Gruppo di lavoro ISS-  
45 Regioni. Attività della sorveglianza ostetrica: l'Istituto Superiore di Sanità-Regioni per la gestione  
46 della grave morbosità materna da emorragia del post partum. Rapporto Osservasalute 2015. Stato  
47 di salute e qualità dell'assistenza nelle regioni italiane. Milano: Prex, 2016. p. 264-6  
48
- 49 50. Doran, G. T. (1981). "There's a S.M.A.R.T. way to write management's goals and objectives".  
50 Management Review (AMA FORUM) 70 (11): 35–36  
51
- 52 51. Borchert M, Goufodji S, Alihonou E, Delvaux T, Saizonou J, Kanhonou L, Filippi V. Can hospital  
53 audit teams identify case management problems, analyse their causes, identify and implement  
54  
55  
56  
57  
58  
59  
60

- 1  
2 improvements? A cross-sectional process evaluation of obstetric near-miss case reviews in Benin.  
3 BMC Pregnancy Childbirth. 2012 ;12:109.  
4  
5 52. Bacci A, Hodorocea S, Khachatryan H, Babojonova S, Irse S, Jansone M, Dondiuc M, Matarazde  
6 G, Lazdane G, Lazzarini M. Assessment of the quality of the facility based individual near miss case  
7 reviews in the WHO European Region: findings from Armenia, Georgia, Latvia, Republic of Moldova,  
8 Uzbekistan (submitted for publication to BMJ Open, minor revision requested)  
9  
10 53. Aguiar Cde A, Tanaka AC. [Collective memories of women who have experienced maternal near  
11 miss: health needs and human rights]. Cad Saude Publica. 2016 ;32:e00161215.  
12  
13 54. Pãfs J, Musafili A, Binder-Finnema P, Klingberg-Allvin M, Rulisa S, Essén B. Beyond the numbers of  
14 maternal near-miss in Rwanda - a qualitative study on women's perspectives on access and  
15 experiences of care in early and late stage of pregnancy. BMC Pregnancy Childbirth. 2016 ;16:257.  
16  
17 55. Hinton L, Locock L, Knight M. Experiences of the quality of care of women with near-miss maternal  
18 morbidities in the UK. BJOG. 2014 ;121 Suppl 4:20-3  
19  
20 56. Aghlmand S, Akbari F, Lameei A, Mohammad K, Small R, Arab M. Developing evidence-based  
21 maternity care in Iran: a quality improvement study. BMC Pregnancy Childbirth. 2008 ;8:20.  
22  
23  
24  
25  
26  
27  
28  
29  
30  
31  
32  
33  
34  
35  
36  
37  
38  
39  
40  
41  
42  
43  
44  
45  
46  
47  
48  
49  
50  
51  
52  
53  
54  
55  
56  
57  
58  
59  
60

1  
2  
3  
4  
5  
6  
7  
8  
9  
10  
11  
12  
13  
14  
15  
16  
17  
18  
19  
20  
21  
22  
23  
24  
25  
26  
27  
28  
29  
30  
31  
32  
33  
34  
35  
36  
37  
38  
39  
40  
41  
42  
43  
44  
45  
46  
47  
48  
49  
50  
51  
52  
53  
54  
55  
56  
57  
58  
59  
60

## TABLES

### Box 1. Search strategy

**PubMed**                      **Date: Sept 15, 2017**                      **Total retrieved: 5578**

"near miss" OR (audit AND (obstetric\* OR matern\* OR pregnan\* OR woman OR women))

**Lilacs**                              **Date: Sept 15, 2017**                      **Total retrieved: 227**

(TW:near miss OR MH:near miss) OR ((TW:audit OR MH:audit OR TW:auditoria OR MH:auditoria OR auditoria) AND (gravid\$ OR pregnan\$ OR enceint\$ OR embarazad\$ OR obstetr\$ OR mulher\$ OR mujer\$ OR femme\$ OR woman OR women OR matern\$))

**Global Idex Medicus**                      **Date: Sept 15, 2017**                      **Total retrieved: 7806**

(TW:near miss OR MH:near miss) OR ((TW:audit OR MH:audit OR TW:auditoria OR MH:auditoria OR auditoria) AND (gravid\$ OR pregnan\$ OR enceint\$ OR embarazad\$ OR obstetr\$ OR mulher\$ OR mujer\$ OR femme\$ OR woman OR women OR matern\$))

**Web of Science**                      **Date: Sept 18, 2017**                      **Total retrieved: 4850**

TS= "near miss" OR (TS=audit AND TS=(gravid\* OR pregnan\* OR obstetr\* OR woman OR women OR matern\*))

**Cochrane Library**                      **Date: Sept 15, 2017**                      **Total retrieved: :411**

"near miss" OR (audit AND (gravid\* or pregnan\* or obstetr\* or woman or women or matern\*))

**EMBASE**                              **Date: Sept 15, 2017**                      **Total retrieved: 5927**

- 1 ("near miss" or audit).ab. (34259)
- 2 (obstetric\* or matern\* or pregnan\* or woman or women).ab. (1057153)
- 3 1 and 2 (4764)
- 4 ("near miss" or audit).ti. (13725)
- 5 (obstetric\* or matern\* or pregnan\* or woman or women).ti. (325314)
- 6 4 and 5 (724)
- 7 3 or 6 (4962)

**Table 1. Study settings, designs and sample sizes**

| Author                                                            | Design | Duration  | Country    | Setting | Number and type of hospitals §                                                           |
|-------------------------------------------------------------------|--------|-----------|------------|---------|------------------------------------------------------------------------------------------|
| Lumala 2017 <sup>13</sup>                                         | ITS    | 10 months | Uganda     | Urban   | 1 tertiary specialist hospital, catholic funded private non profit                       |
| Mgaya 2017 <sup>14</sup>                                          | NCBA   | 25 months | Tanzania   | Urban   | 1 tertiary specialist hospital                                                           |
| Kayiga 2016 <sup>15</sup>                                         | NCBA   | 7 months  | Uganda     | Urban   | 1 tertiary specialist hospital                                                           |
| Mohd Azri 2015 <sup>16</sup>                                      | NCBA   | 2 years   | Malaysia   | Urban   | 1 tertiary specialist hospital                                                           |
| Gebrehiwot 2014 <sup>17</sup>                                     | NCBA   | 18 months | Ethiopia   | Urban   | 10 public hospitals                                                                      |
| Baltag 2012 <sup>18</sup>                                         | NCBA   | 13 months | Moldova    | Mixed   | 3 mixed (referral-level facilities at municipal, national and district levels)           |
| Kidanto 2012 <sup>19</sup>                                        | NCBA   | 3 years   | Tanzania   | Urban   | 1 teaching hospital                                                                      |
| Sukhanberdiyev 2011 <sup>20</sup><br>Hodorogea 2010 <sup>21</sup> | NCBA   | 2 years   | Kazakhstan | Urban   | 6 mixed (national research centre, regional and city hospitals)                          |
| Van den Akker 2011 <sup>22</sup>                                  | ITS    | 2 years   | Malawi     | Rural   | 29 mixed (1 referral hospital and 28 government, private and mission smaller facilities) |
| Bailey 2010 <sup>23</sup>                                         | NCBA   | 2 years   | Vietnam    | Mixed   | 5 mixed (provincial, area and district)                                                  |
| Van den Akker 2009 <sup>24</sup>                                  | NCBA   | 1 year    | Malawi     | Rural   | 1 referral hospital + undefined numbers of health centers                                |
| Hun Yinbo 2008 <sup>25</sup>                                      | NCBA   | 13 months | Nigeria    | Urban   | 1 tertiary specialist hospital                                                           |
| Kongnyuy 2008 <sup>26</sup>                                       | NCBA   | 2 years   | Malawi     | Mixed   | 73 mixed (hospitals, health centers)                                                     |

|                                        |      |           |                      |       |                                                      |
|----------------------------------------|------|-----------|----------------------|-------|------------------------------------------------------|
| <b>Kongnyuy 2008</b> <sup>27</sup>     | NCBA | 6 months  | Malawi               | Rural | 1 one district hospital, 12 satellite health centers |
| <b>Weeks 2005</b> <sup>28</sup>        | NCBA | 20 months | Uganda               | Urban | 1 teaching hospital                                  |
| <b>Wagaarachchi 2001</b> <sup>29</sup> | NCBA | 26 months | Ghana and<br>Jamaica | Urban | 4 district hospitals                                 |

Abbreviations: NCBA= non controlled before and fater study, ITS= Intermittent time series



Table 2. Characteristics of the interventions

| Author                        | Characteristics of the audit                          | Who performed the audit                                                                                           | Who developed the recommendations                    | Type of cases audited                   | Selection criteria                                                                                                                 | N Case audited (before / after)                | Woman Interview |
|-------------------------------|-------------------------------------------------------|-------------------------------------------------------------------------------------------------------------------|------------------------------------------------------|-----------------------------------------|------------------------------------------------------------------------------------------------------------------------------------|------------------------------------------------|-----------------|
| Lumala 2017 <sup>13</sup>     | two phases, retrospective                             | medical doctor                                                                                                    | facility staff                                       | PPH and severe pre-eclampsia, eclampsia | All in-patient cases in the study period, not referred and not receiving hydralazine or magnesium sulphate from the referring unit | 238 (125 before, 133 after)                    | no              |
| Mgaya 2017 <sup>14</sup>      | two phases, retrospective                             | trained postnatal ward nurses, s (a consultant, a specialist and a midwife were also available for consultation ) | facility staff (AN, L, MO, MW, P)                    | obstructed labour                       | All cases of obstructed labour with a single foetus in cephalic presentation, and no other severe medical conditions or PROM       | 510 (260 before, 250 after)                    | Yes             |
| Kayiga 2016 <sup>15</sup>     | two phases, prospective                               | NR                                                                                                                | facility staff (MO, MW, M)                           | obstructed labour                       | all cases occurring in the study period                                                                                            | 360 (180 before, 180 after)                    | yes             |
| Mohd Azri 2015 <sup>16</sup>  | first phase retrospective, second regular prospective | NR                                                                                                                | facility staff (members of the obstetric department) | eclampsia                               | all cases occurring in the study period                                                                                            | 51 (42 before, 9 after)                        | no              |
| Gebrehiwot 2014 <sup>17</sup> | prospective                                           | facility staff (MO, MW and other hospital staff + focal person)                                                   | facility staff                                       | all NM + MD                             | all cases occurring in the study period                                                                                            | 2568                                           | no              |
| Baltag 2012 <sup>18</sup>     | prospective                                           | facility staff involved in case management (MO, MD +                                                              | facility staff involved in case management (MO, MD + | NM                                      | not pre-defined criteria, cases were chosen by director                                                                            | 30 approx ( 1 case per month in each hospital) | yes             |

|                                                                                 |                                                     |                                                                               |                           |                                                                                                                |                                                                                                 |                                             |     |
|---------------------------------------------------------------------------------|-----------------------------------------------------|-------------------------------------------------------------------------------|---------------------------|----------------------------------------------------------------------------------------------------------------|-------------------------------------------------------------------------------------------------|---------------------------------------------|-----|
|                                                                                 |                                                     | occasionally L, T, PHC)                                                       | occasionally L, T, PHC)   |                                                                                                                |                                                                                                 |                                             |     |
| <b>Kidanto 2012</b> <sup>19</sup>                                               | first phase retrospective, second prospective       | 1 senior doctor                                                               | facility staff            | eclampsia and pre-eclampsia                                                                                    | all cases occurring in the study period                                                         | 477 (389 before, 88 after)                  | no  |
| <b>Sukhanberdiyev 2011</b> <sup>20</sup><br><b>Hodorogea 2010</b> <sup>21</sup> | prospective                                         | facility staff                                                                | facility staff            | PPH and severe pre-eclampsia                                                                                   | NR                                                                                              | not more than 10 in each hospital each year | yes |
| <b>Van den Akker 2011</b> <sup>22</sup>                                         | prospective every 2 to 3 weeks;                     | facility staff, occasionally external obs gyn                                 | facility staff            | infection, PPH, uterine rupture, preeclampsia, others) + MD                                                    | all cases occurring in the study period                                                         | 45 (24 deaths; 21 SOC)                      | no  |
| <b>Bailey 2010</b> <sup>23</sup>                                                | first phase retrospective, than regular prospective | facility staff (MO, N, M)                                                     | facility staff (MO, N, M) | severe preeclampsia, postpartum infection, prolonged/obstructed labour, PPH, organisation of emergency service | all cases occurring in the study period                                                         | 558 (312 before, 246 after)                 | no  |
| <b>Van den Akker 2009</b> <sup>24</sup>                                         | prospective every 2- 3 weeks for 3 months           | facility staff (M,MA, MO, MW,N); 2 external obstetricians in the second phase | facility staff (MO, N, M) | uterine rupture                                                                                                | cases that appeared to be of particular educational value to the PI or any other hospital staff | 35                                          | no  |

|                                        |                                               |                                                                          |                                               |                                                                                                                                      |                                         |                              |    |
|----------------------------------------|-----------------------------------------------|--------------------------------------------------------------------------|-----------------------------------------------|--------------------------------------------------------------------------------------------------------------------------------------|-----------------------------------------|------------------------------|----|
| <b>Hunyinbo 2008</b> <sup>25</sup>     | two phases, prospective                       | study investigator/s                                                     | facility staff (M,MA, MO, N,P, L)             | PPH, uterine rupture, eclampsia, obstructed labour, sepsis                                                                           | all cases occurring in the study period | 130 (65 before, 65 after)    | no |
| <b>Kongnyuy 2008</b> <sup>26</sup>     | two phases, prospective                       | facility staff (AN,M,MO,MW, L, T )                                       | facility staff (quality improvement team)     | PPH, obstructed labour, sepsis, preeclampsia/ eclampsia, neonatal care, CS , women-friendly care+ MD                                 | NR                                      | NR                           | no |
| <b>Kongnyuy 2008</b> <sup>27</sup>     | two phases, retrospective                     | district team (N, MW, CO,AN,T)                                           | hospital staff (quality improvement team)     | pre-eclampsia/ eclampsia, PPH, prolonged/ obstructed labour, retained placenta, sepsis, complications of abortion, ectopic pregnancy | all cases occurring in the study period | 122 (60 before, 62 after)    | no |
| <b>Weeks 2005</b> <sup>28</sup>        | first phase retrospective, second prospective | facility staff (including low grade staff)                               | facility staff                                | severe pre-eclampsia                                                                                                                 | all cases occurring in the study period | 86 (43 before, 43 after)     | no |
| <b>Wagaarachchi 2001</b> <sup>29</sup> | first phase retrospective, second prospective | non-medical assistants (10% of cases validated by independent re-review) | facility staff (M,MO, M + all relevant staff) | PPH, eclampsia, infection, obstructed labor, uterine rupture                                                                         | all cases occurring in the study period | 889 ( 551 before, 338 after) | no |

Abbreviations: AN= anesthetist of anesthetic technician, CO=clinical officer, CS= caesarian section, L= Laboratory, M= manager, MA=medical assistant, MD= maternal deaths, MO=medical officer, MW=midwife, N=nurse, ND= neonatal deaths, NM=Near miss, NR= not reported,P=Pharmacy, PHC= primary health care staff, PPH= post-partum hemorrhage, PROM= premature rupture of membranes, SOC= all severe obstetric cases, SEL= selected obstetric cases, T= technician

**Table 3. Effectiveness of the NMCR cycle on morbidity and on process outcomes**

| Author                                                                          | Morbidity and other health outcomes                                                                                                                                                                                                                     | Standards of care                                                                                                                                          | Other process outcomes                                                                                                                 |
|---------------------------------------------------------------------------------|---------------------------------------------------------------------------------------------------------------------------------------------------------------------------------------------------------------------------------------------------------|------------------------------------------------------------------------------------------------------------------------------------------------------------|----------------------------------------------------------------------------------------------------------------------------------------|
| <b>Lumala 2017</b> <sup>13</sup>                                                | –                                                                                                                                                                                                                                                       | Eclampsia and pre-eclampsia: 7/10 standards<br>PPH: 3/4 standards                                                                                          | -                                                                                                                                      |
| <b>Mgaya 2017</b> <sup>14</sup>                                                 | SAMM (incidence: 9.0% vs. 8.8% (p = 0.98).<br>Uterine rupture (incidence): 1/260 vs 0/250 (p=0.49)<br>Perinatal severe morbidities and deaths and fresh stillbirths: 16% vs. 8.8% (p = 0.01)                                                            | Obstructed labour: 6/10 standards on diagnosis, 6/10 standards on case management                                                                          | Significant reduction of time needed from decision to perform a caesarian section to delivery (mean difference:- 30 minutes, p< 0.001) |
| <b>Kayiga 2016</b> <sup>15</sup>                                                | Uterine rupture (Incidence): 8/180 vs 2/180 (p=0.04)<br>Maternal sepsis (Incidence): 10/180 vs 2/180 (p=0.02)<br>Post-spinal headache (incidence): 0/180 vs 13/180 (p<0.001)<br>Baby admitted to intensive care: 27/180 vs 31/180 (p=0.61)              | Obstructed labour: 2/6 standards, 4/13 measures of standards                                                                                               | -                                                                                                                                      |
| <b>Mohd Azri 2015</b> <sup>16</sup>                                             | Eclampsia (incidence): 42/44818 vs 9/10784 (p> 0.05)<br>Recurrent eclamptic fits: 8/42 vs 1/9 (p> 0.05)<br>Newborn babies with Apgar score (< 7) at 5 minutes after birth: 8/42 vs 3/9 (p> 0.05)<br>Birth weight less than 2500g 22/42 vs 5/9 (p> 0.05) | Improved adherence to 2/2 audit criteria that where substandard in the first phase (all other 10 criteria were already according to standards at baseline) | -                                                                                                                                      |
| <b>Gebrehiwot 2014</b> <sup>17</sup>                                            | -                                                                                                                                                                                                                                                       | -                                                                                                                                                          | Reducing waiting time                                                                                                                  |
| <b>Baltag 2012</b> <sup>18</sup>                                                | -                                                                                                                                                                                                                                                       | -                                                                                                                                                          | Improved medical records<br>Improved attitude towards patients                                                                         |
| <b>Kidanto 2012</b> <sup>19</sup>                                               | -                                                                                                                                                                                                                                                       | Eclampsia and pre-eclampsia: 10/16 standards                                                                                                               | Improved records keeping                                                                                                               |
| <b>Sukhanberdiyev 2011</b> <sup>20</sup><br><b>Hodorogea 2010</b> <sup>21</sup> | Improved patients satisfaction (NR)                                                                                                                                                                                                                     | -                                                                                                                                                          | Improved case management and monitoring (eg weighing of blood losses and documenting systematically)                                   |

|                                         |                                                                                                                                                                                                                                                                                               |                                                                                                                     |                                                                                                                         |
|-----------------------------------------|-----------------------------------------------------------------------------------------------------------------------------------------------------------------------------------------------------------------------------------------------------------------------------------------------|---------------------------------------------------------------------------------------------------------------------|-------------------------------------------------------------------------------------------------------------------------|
| <b>Van den Akker 2011</b> <sup>22</sup> | SAMM (Incidence): 33/2295 vs 49/5291 (p=0.08)<br>Major PPH (incidence): 17/2295 vs 15/5291 (p=0.006)<br>Uterine rupture (Incidence): 14/2295 vs 4/5291 (p=0.03)<br>Severe pre-eclampsia (Incidence): 6/2295 vs 16/5291 (p=0.3)<br>Maternal infections (Incidence): 10/2295 vs 14/5291 (p=0.6) | -                                                                                                                   | Improved patients monitoring                                                                                            |
| <b>Bailey 2010</b> <sup>23</sup>        | -                                                                                                                                                                                                                                                                                             | Eclampsia: 12/18 standards<br>Infections: 11/23 standards<br>Obstructed labour: 1/1 standards<br>PPH: 3/3 standards | -                                                                                                                       |
| <b>Van den Akker 2009</b> <sup>24</sup> | Uterine rupture (incidence): 16/833 vs 19/3099 (OR 0.32; 95% CI, 0.16–0.63)                                                                                                                                                                                                                   | -                                                                                                                   | -                                                                                                                       |
| <b>Hun Yinbo 2008</b> <sup>25</sup>     | -                                                                                                                                                                                                                                                                                             | SAMM: 8/31 standards                                                                                                | -                                                                                                                       |
| <b>Kongnyuy 2008</b> <sup>26</sup>      | -                                                                                                                                                                                                                                                                                             | -                                                                                                                   | Significant increase in the met need for EmOC (15.2% for 2005, 17.0% for 2006 and 18.8% for 2007, p for trend < 0.001). |
| <b>Kongnyuy 2008</b> <sup>27</sup>      | -                                                                                                                                                                                                                                                                                             | SAMM: 4 /7 standards<br>(other criteria were already according to standards at baseline)                            | -                                                                                                                       |
| <b>Weeks 2005</b> <sup>28</sup>         | Eclampsia (incidence): 5/43 vs 5/43 (p> 0.05)                                                                                                                                                                                                                                                 | Severe pre-eclampsia: 5/9 standards                                                                                 | -                                                                                                                       |
| <b>Wagaarachchi 2001</b> <sup>29</sup>  | -                                                                                                                                                                                                                                                                                             | SA: 8/31 standards                                                                                                  | -                                                                                                                       |

Abbreviations: CFR= case fatality rate; MM= maternal mortality; MMO= maternal morbidity; NM= neonatal mortality; NR= not further specified; PM: perinatal mortality; PPH= post partum hemorrhage; SAMM: severe acute maternal morbidity

Table 4. Effectiveness of the NMCR cycle on the structure

| Author                        | Physical structure                             | Staffing                                                                            | Equipment and supplies                            | Training, monitoring and supervision                                    | Local policies and organization of services                                                                                                                                                                                                                                                                                                                             |
|-------------------------------|------------------------------------------------|-------------------------------------------------------------------------------------|---------------------------------------------------|-------------------------------------------------------------------------|-------------------------------------------------------------------------------------------------------------------------------------------------------------------------------------------------------------------------------------------------------------------------------------------------------------------------------------------------------------------------|
| Lumala 2017 <sup>13</sup>     |                                                |                                                                                     |                                                   |                                                                         |                                                                                                                                                                                                                                                                                                                                                                         |
| Mgaya 2017 <sup>14</sup>      |                                                |                                                                                     |                                                   | training on partograph, improved supervision                            | Improved dissemination and use of guidelines, Improved team work and internal communication among hospital staff                                                                                                                                                                                                                                                        |
| Kayiga 2016 <sup>15</sup>     |                                                |                                                                                     |                                                   |                                                                         | Re-engineering hospital Red Alert System: list of responsible person to be contacted during Red Alert activation was put up in all obstetrics facilities; Information on the importance of activating the Red Alert in eclampsia cases was disseminated to all staff; hospital telephone operator was informed regarding existence of this system and how it functions. |
| Mohd Azri 2015 <sup>16</sup>  |                                                | Better specification of roles and responsibilities                                  |                                                   | Training, improved awareness of standards, improved patient's education | Reorganization of "red alert" system                                                                                                                                                                                                                                                                                                                                    |
| Gebrehiwot 2014 <sup>17</sup> | Some hospitals expanded accommodate more cases | Staff organization: duties assignment; staff rotation every 12 h to avoid tiredness | Contribution of resources (stationery, transport) | Provision of training and feedback to health centers                    | Improved dissemination of protocols, increased use of partograph, Improved documentation and reporting improved coordination with health centers,                                                                                                                                                                                                                       |
| Baltag 2012 <sup>18</sup>     |                                                |                                                                                     | Improved equipment and supplies                   |                                                                         | Improved dissemination of protocols, organization of care and management                                                                                                                                                                                                                                                                                                |
| Kidanto 2012 <sup>19</sup>    |                                                | Improved doctor availability 24/24h                                                 | Additional equipment purchased                    | Training                                                                | Improved dissemination of protocols, monitoring forms, reorganization of daily routine and setting of priorities, doctors assigned to manage cases of                                                                                                                                                                                                                   |

|                                                                                 |                                                       |                                                                                                                                                                          |                                                                                                         |                                                                                        |                                                                                                                                                                                                                                                                                                             |
|---------------------------------------------------------------------------------|-------------------------------------------------------|--------------------------------------------------------------------------------------------------------------------------------------------------------------------------|---------------------------------------------------------------------------------------------------------|----------------------------------------------------------------------------------------|-------------------------------------------------------------------------------------------------------------------------------------------------------------------------------------------------------------------------------------------------------------------------------------------------------------|
|                                                                                 |                                                       |                                                                                                                                                                          |                                                                                                         |                                                                                        | eclampsia                                                                                                                                                                                                                                                                                                   |
| <b>Sukhanberdiyev 2011</b> <sup>20</sup><br><b>Hodorogea 2010</b> <sup>21</sup> |                                                       | Rational use of staff by internal redistribution, optimization of human resources by reducing the working hours, increased role of mid-level staff (midwives and nurses) | Mobile devices for timely alert and warning, drugs and blood components, prostaglandins and uterotonics | Training on protocols and standards, periodic drills, improving time management skills | Developing, diffusing and use new evidenced-based protocols, developing emergency care algorithms and conditions for transportation from remote areas, identifying the responsible person for the readiness of the emergency kit, monitoring forms, weighing of blood losses and documenting systematically |
| <b>Van den Akker 2011</b> <sup>22</sup>                                         |                                                       |                                                                                                                                                                          |                                                                                                         | Training, regular on job coaching, improved supervision, monitoring of ambulance use   | Improved dissemination of protocols and use of partograph, doctors to visits critically ill patients at least once a day                                                                                                                                                                                    |
| <b>Bailey 2010</b> <sup>23</sup>                                                |                                                       |                                                                                                                                                                          | Purchase of equipment (lab, car for oncall, telephone for emergency), wall flow charts                  | Training, supervision                                                                  | Leadership on implementing changes, standardization of treatment with protocols and checklists, team work record keeping                                                                                                                                                                                    |
| <b>Van den Akker 2009</b> <sup>24</sup>                                         |                                                       |                                                                                                                                                                          | More ambulances                                                                                         | Training, supervision, follow up visits in health centers                              | Improved dissemination of protocols, transport organization, organize session for theater staff with the intention to reduce delay in surgical care                                                                                                                                                         |
| <b>Hunyinbo 2008</b> <sup>25</sup>                                              |                                                       |                                                                                                                                                                          | Pharmacy supply including oxytocins, MgSO <sub>4</sub> , blood and coagulation tests                    |                                                                                        | Improved dissemination of protocols, clinical meetings, observational and fluid balance charts                                                                                                                                                                                                              |
| <b>Kongnyuy 2008</b> <sup>26</sup>                                              | The number of comprehensive and basic EmOC facilities |                                                                                                                                                                          |                                                                                                         |                                                                                        |                                                                                                                                                                                                                                                                                                             |

|                                        |                |                                                                                                                                 |                                                            |          |                                                                                                                                                                                                                                                                  |
|----------------------------------------|----------------|---------------------------------------------------------------------------------------------------------------------------------|------------------------------------------------------------|----------|------------------------------------------------------------------------------------------------------------------------------------------------------------------------------------------------------------------------------------------------------------------|
|                                        | did not change |                                                                                                                                 |                                                            |          |                                                                                                                                                                                                                                                                  |
| <b>Kongnyuy 2008</b> <sup>27</sup>     |                | Autonomy in decision making in MW-N                                                                                             | Better equipment and set up of service                     | Training | Reorganization of emergency care service, including use of ambulances,                                                                                                                                                                                           |
| <b>Weeks 2005</b> <sup>28</sup>        |                | Staff in the labour room reorganised giving each member a specific role in the management of emergencies;<br>two extra midwives | Equipment (urine dipstick, BP machines)                    |          | Triage established, leadership (direct of labour appointed), protocol and chart, commitment to improve medical files, departmental meetings, fundraising (a fundraising committee was established to raise funds for the drugs and equipment in recommendations) |
| <b>Wagaarachchi 2001</b> <sup>29</sup> |                |                                                                                                                                 | Record storage, blood cultures, structured patient records |          | Improved dissemination of protocols, reviewing supervisory responsibilities, organization of regular clinical meetings                                                                                                                                           |

Abbreviations: BP= Blood pressure; EmOC= Emergency Obstetric Care; N= Nurses; M=Midwives



## LEGENDS

### FIGURES

Figure 1. Study Flow Diagram

Figure 2. Pooled effect of the NMCR on maternal mortality

Figure 3. Pooled effect of the NMCR on perinatal or neonatal mortality

### SUPPLEMENTARY TABLES

Table S1. Type of outcomes evaluated in the studies

Table S2. Risk of bias

Table S3. World bank classification of country income

### SUPPLEMENTARY FIGURES

Figure S1. Sensitivity analysis : Pooled effect of the NMCR on maternal mortality in studies with at least 300 cases and 30 events

Figure S2. Sensitivity analysis : Pooled effect of the NMCR on perinatal mortality in studies with at least 300 cases and 30 events

Figure S3. Subgroup analysis : Pooled effect of the NMCR audit on maternal mortality by country income

Figure S4. Subgroup analysis : Pooled effect of the NMCR on perinatal mortality by country income

Figure S5. Funnel plot: effect of the NMCR on maternal mortality

Figure S6. Funnel plot: effect of the NMCR on perinatal mortality

For peer review only

1  
2  
3  
4  
5  
6  
7  
8  
9  
10  
11  
12  
13  
14  
15  
16  
17  
18  
19  
20  
21  
22  
23  
24  
25  
26  
27  
28  
29  
30  
31  
32  
33  
34  
35  
36  
37  
38  
39  
40  
41  
42  
43  
44  
45  
46  
47

1  
2  
3  
4  
5  
6  
7  
8  
9  
10  
11  
12  
13  
14  
15  
16  
17  
18  
19  
20  
21  
22  
23  
24  
25  
26  
27  
28  
29  
30  
31  
32  
33  
34  
35  
36  
37  
38  
39  
40  
41  
42  
43  
44  
45  
46  
47  
48  
49  
50  
51  
52  
53  
54  
55  
56  
57  
58  
59  
60

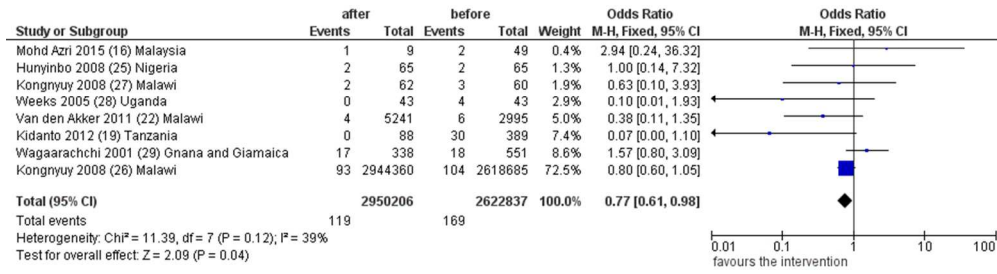

Figure 1. Study Flow Diagram

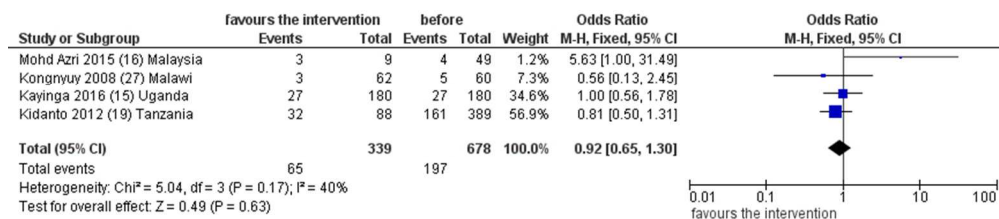

Figure 2. Pooled effect of the NMCR on maternal mortality

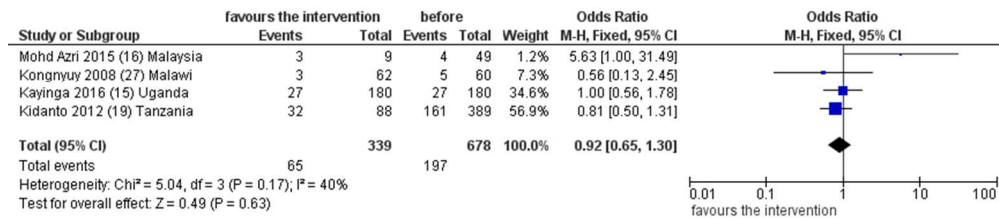

Figure 3. Pooled effect of the NMCR on perinatal or neonatal mortality

Table S1. Type of outcomes evaluated in the studies

| Author                                                            | Patient centrality<br>and acceptability | Accessibility<br>Timely care | Efficiency<br>and equity | Safety | Effectiveness |
|-------------------------------------------------------------------|-----------------------------------------|------------------------------|--------------------------|--------|---------------|
| Lumala 2017 <sup>13</sup>                                         | —                                       | yes                          | —                        | —      | yes           |
| Mgaya 2017 <sup>14</sup>                                          | —                                       | yes                          | —                        | —      | yes           |
| Kayiga 2016 <sup>15</sup>                                         | —                                       | —                            | —                        | —      | yes           |
| Mohd Azri 2015 <sup>16</sup>                                      | —                                       | —                            | —                        | —      | yes           |
| Gebrehiwot 2014 <sup>17</sup>                                     | —                                       | yes                          | —                        | —      | yes           |
| Baltag 2012 <sup>18</sup>                                         | yes                                     | —                            | —                        | —      | yes           |
| Kidanto 2012 <sup>19</sup>                                        | —                                       | yes                          | —                        | —      | yes           |
| Sukhanberdiyev 2011 <sup>20</sup><br>Hodorogea 2010 <sup>21</sup> | yes                                     | yes                          | —                        | —      | yes           |
| Van den Akker 2011 <sup>22</sup>                                  | —                                       | yes                          | —                        | —      | yes           |
| Bailey 2010 <sup>23</sup>                                         | —                                       | yes                          | —                        | —      | yes           |
| Van den Akker 2009 <sup>24</sup>                                  | —                                       | yes                          | —                        | —      | yes           |
| Hunyinbo 2008 <sup>25</sup>                                       | —                                       | yes                          | —                        | —      | yes           |
| Kongnyuy 2008 <sup>26</sup>                                       | —                                       | yes                          | —                        | —      | yes           |

1  
2  
3  
4  
5  
6  
7  
8  
9  
10  
11  
12  
13  
14  
15  
16  
17  
18  
19  
20  
21  
22  
23  
24  
25  
26  
27  
28  
29  
30  
31  
32  
33  
34  
35  
36  
37  
38  
39  
40  
41  
42  
43  
44  
45  
46

|                                        |   |     |   |   |     |
|----------------------------------------|---|-----|---|---|-----|
| <b>Kongnyuy 2008</b> <sup>27</sup>     | — | yes | — | — | yes |
| <b>Weeks 2005</b> <sup>28</sup>        | — | yes | — | — | yes |
| <b>Wagaarachchi 2001</b> <sup>29</sup> | — | yes | — | — | yes |

For peer review only

Table S2. Risk of bias

| Author                                                            | Study design | Risk of bias criteria for RCTs, CCTs, CBAs, UCBA |                               |                 |                                |                            | Additive risk of bias criteria for ITS            |                                                       |                                                         |
|-------------------------------------------------------------------|--------------|--------------------------------------------------|-------------------------------|-----------------|--------------------------------|----------------------------|---------------------------------------------------|-------------------------------------------------------|---------------------------------------------------------|
|                                                                   |              | <i>Random sequence generation</i>                | <i>Allocation concealment</i> | <i>Blinding</i> | <i>Incomplete outcome data</i> | <i>Selective reporting</i> | <i>Intervention independent of other changes?</i> | <i>Shape of the intervention effect prespecified?</i> | <i>Intervention unlikely to affect data collection?</i> |
| Lumala 2017 <sup>13</sup>                                         | ITS          | high                                             | high                          | high            | low                            | unclear                    | high                                              | low                                                   | high                                                    |
| Mgaya 2017 <sup>14</sup>                                          | NCBA         | high                                             | high                          | high            | low                            | unclear                    | -                                                 | -                                                     | -                                                       |
| Kayiga 2016 <sup>15</sup>                                         | NCBA         | high                                             | high                          | high            | low                            | unclear                    | -                                                 | -                                                     | -                                                       |
| Mohd Azri 2015 <sup>16</sup>                                      | NCBA         | high                                             | high                          | high            | low                            | unclear                    | -                                                 | -                                                     | -                                                       |
| Gebrehiwot 2014 <sup>17</sup>                                     | NCBA         | high                                             | high                          | high            | low                            | unclear                    | -                                                 | -                                                     | -                                                       |
| Baltag 2012 <sup>18</sup>                                         | NCBA         | high                                             | high                          | high            | low                            | unclear                    | -                                                 | -                                                     | -                                                       |
| Kidanto 2012 <sup>19</sup>                                        | NCBA         | high                                             | high                          | high            | low                            | unclear                    | -                                                 | -                                                     | -                                                       |
| Sukhanberdiyev 2011 <sup>20</sup><br>Hodorogea 2010 <sup>21</sup> | NCBA         | high                                             | high                          | high            | low                            | unclear                    | -                                                 | -                                                     | -                                                       |
| Van den Akker 2011 <sup>22</sup>                                  | ITS          | high                                             | high                          | high            | low                            | unclear                    | high                                              | low                                                   | high                                                    |
| Bailey 2010 <sup>23</sup>                                         | NCBA         | high                                             | high                          | high            | low                            | unclear                    | -                                                 | -                                                     | -                                                       |
| Van den Akker 2009 <sup>24</sup>                                  | NCBA         | high                                             | high                          | high            | low                            | unclear                    | -                                                 | -                                                     | -                                                       |



|                                        |      |      |      |      |     |         |   |   |   |
|----------------------------------------|------|------|------|------|-----|---------|---|---|---|
| <b>Hunyinbo 2008</b> <sup>25</sup>     | NCBA | high | high | high | low | unclear | - | - | - |
| <b>Kongnyuy 2008</b> <sup>26</sup>     | NCBA | high | high | high | low | unclear | - | - | - |
| <b>Kongnyuy 2008</b> <sup>27</sup>     | NCBA | high | high | high | low | unclear | - | - | - |
| <b>Weeks 2005</b> <sup>28</sup>        | NCBA | high | high | high | low | unclear | - | - | - |
| <b>Wagaarachchi 2001</b> <sup>29</sup> | NCBA | high | high | high | low | unclear | - | - | - |

For peer review only

1  
2  
3  
4  
5  
6  
7  
8  
9  
10  
11  
12  
13  
14  
15  
16  
17  
18  
19  
20  
21  
22  
23  
24  
25  
26  
27  
28  
29  
30  
31  
32  
33  
34  
35  
36  
37  
38  
39  
40  
41  
42  
43  
44  
45  
46

Table S3. World bank classification of country income

| Author                            | Country           | WB classification * |
|-----------------------------------|-------------------|---------------------|
| Lumala 2017 <sup>13</sup>         | Uganda            | L                   |
| Mgaya 2017 <sup>14</sup>          | Tanzania          | L                   |
| Kayiga 2016 <sup>15</sup>         | Uganda            | L                   |
| Mohd Azri 2015 <sup>16</sup>      | Malaysia          | UM                  |
| Gebrehiwot 2014 <sup>17</sup>     | Ethiopia          | L                   |
| Baltag 2012 <sup>18</sup>         | Moldova           | LM                  |
| Kidanto 2012 <sup>19</sup>        | Tanzania          | L                   |
| Sukhanberdiyev 2011 <sup>20</sup> | Kazakhstan        | UM                  |
| Hodorogea 2010 <sup>21</sup>      |                   |                     |
| Van den Akker 2011 <sup>22</sup>  | Malawi            | L                   |
| Bailey 2010 <sup>23</sup>         | Vietnam           | L §§                |
| Van den Akker 2009 <sup>24</sup>  | Malawi            | L                   |
| Hunyinbo 2008 <sup>25</sup>       | Nigeria           | L §§                |
| Kongnyuy 2008 <sup>26</sup>       | Malawi            | L                   |
| Kongnyuy 2008 <sup>27</sup>       | Malawi            | L                   |
| Weeks 2005 <sup>28</sup>          | Uganda            | L                   |
| Wagaarachchi 2001 <sup>29</sup>   | Ghana and Jamaica | L §§                |

§ L=Low income; LM=Lower middle income; UM=Upper middle income

§§ Ghana, Jamaica, Nigeria and Vietnam were classified as low income countries during the time of the study, while they were upgraded to lower middle income in 2010, 2007 2008, and 2009 respectively.

1  
2  
3  
4  
5  
6  
7  
8  
9  
10  
11  
12  
13  
14  
15  
16  
17  
18  
19  
20  
21  
22  
23  
24  
25  
26  
27  
28  
29  
30  
31  
32  
33  
34  
35  
36  
37  
38  
39  
40  
41  
42  
43  
44  
45  
46  
47  
48  
49  
50  
51  
52  
53  
54  
55  
56  
57  
58  
59  
60

For peer review only

Figure S1. Sensitivity analysis : Pooled effect of the NMCR on maternal mortality in studies with at least 300 cases and 30 events

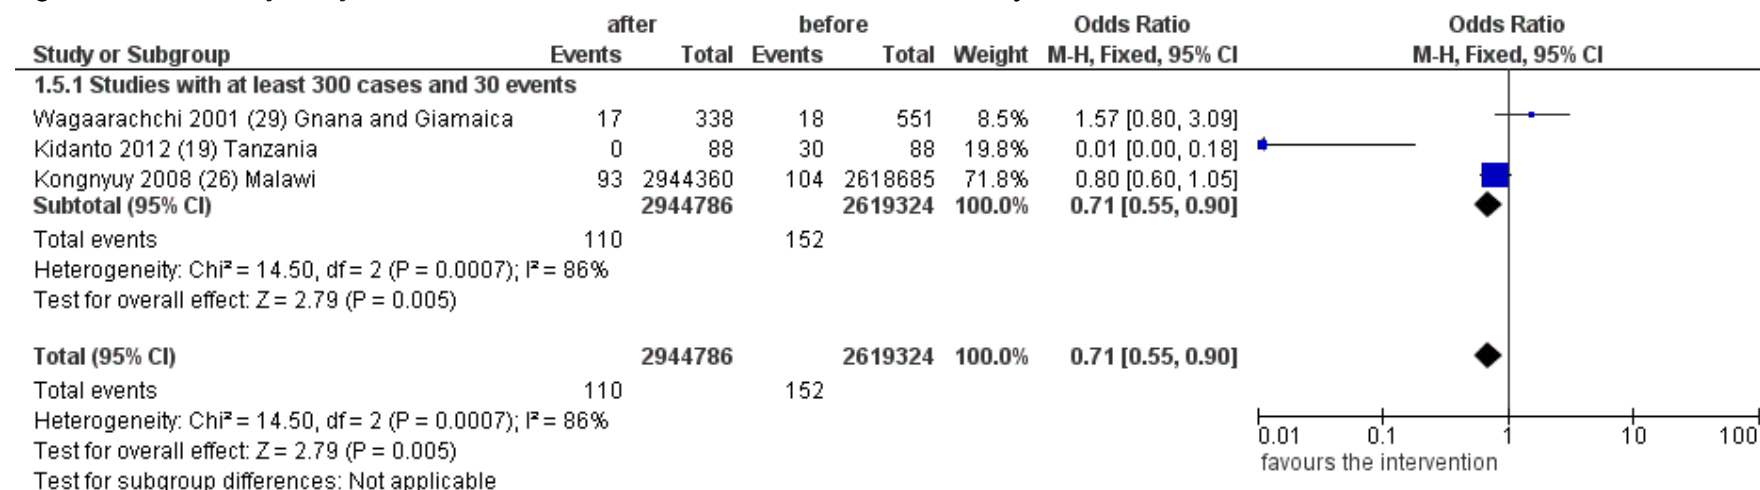

Figure S2. Sensitivity analysis : Pooled effect of the NMCR on perinatal mortality in studies with at least 300 cases and 30 events

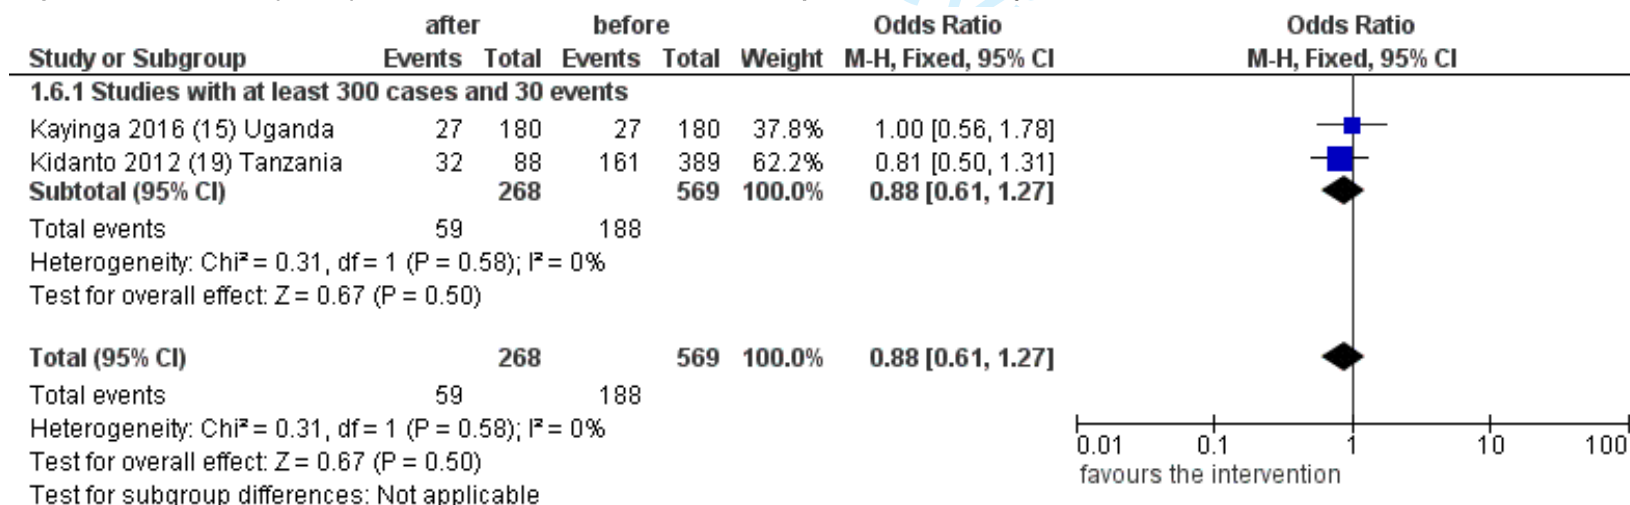

Figure S3. Subgroup analysis : Pooled effect of the NMCR audit on maternal mortality by country income

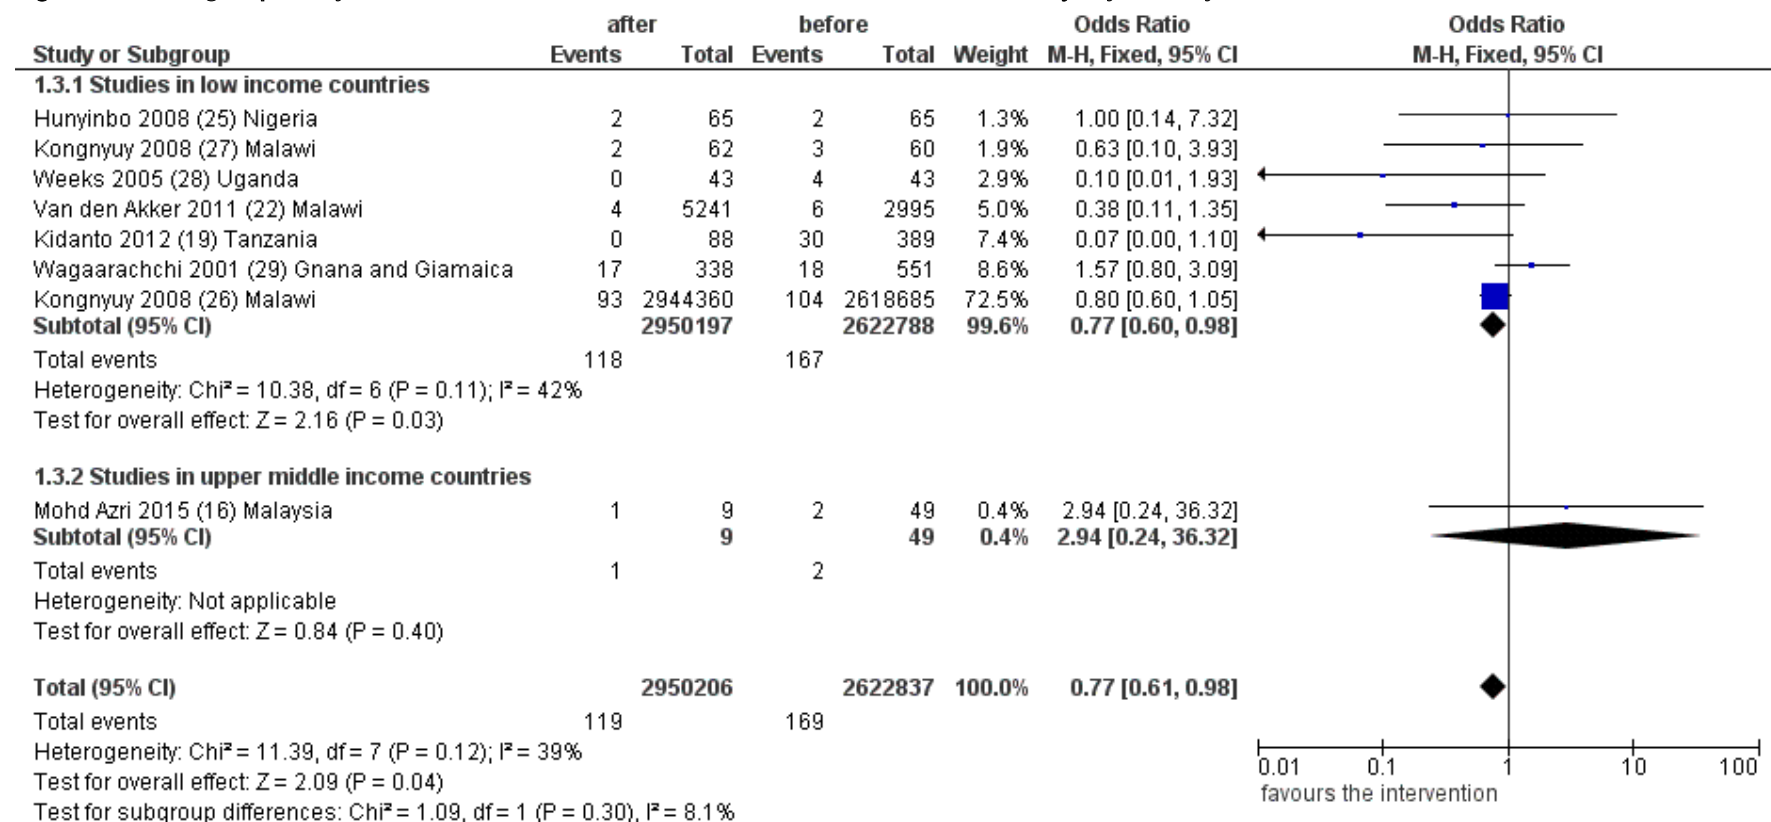

Figure S4. Subgroup analysis : Pooled effect of the NMCR on perinatal mortality by country income

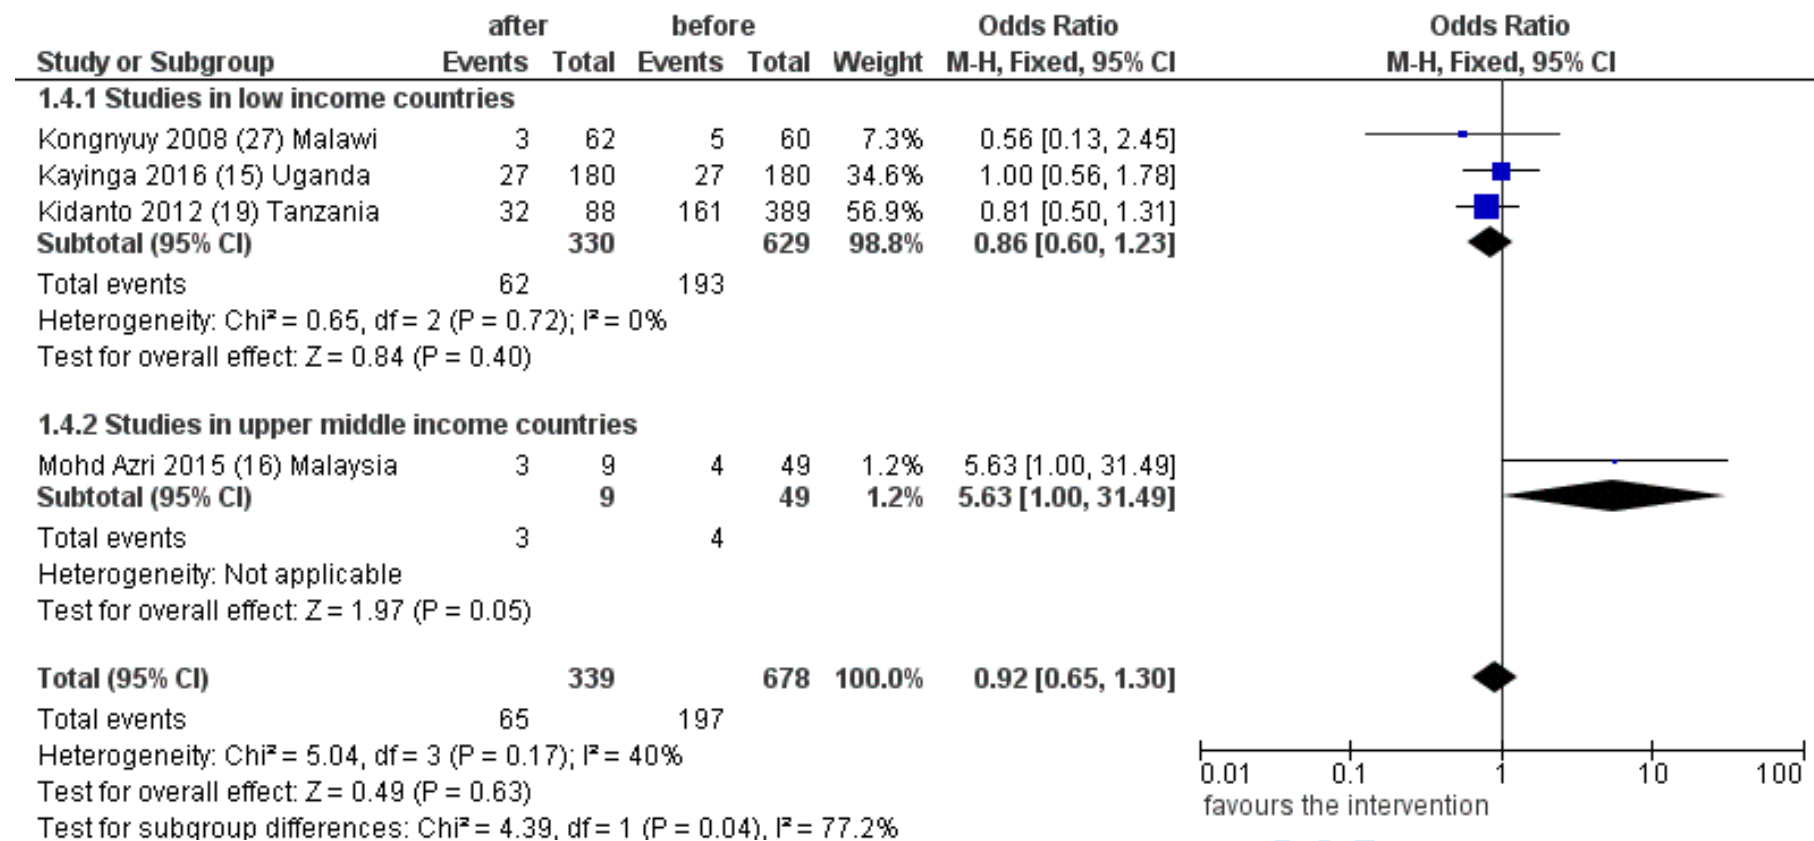

Figure S5. Funnel plot: effect of the NMCR on maternal mortality

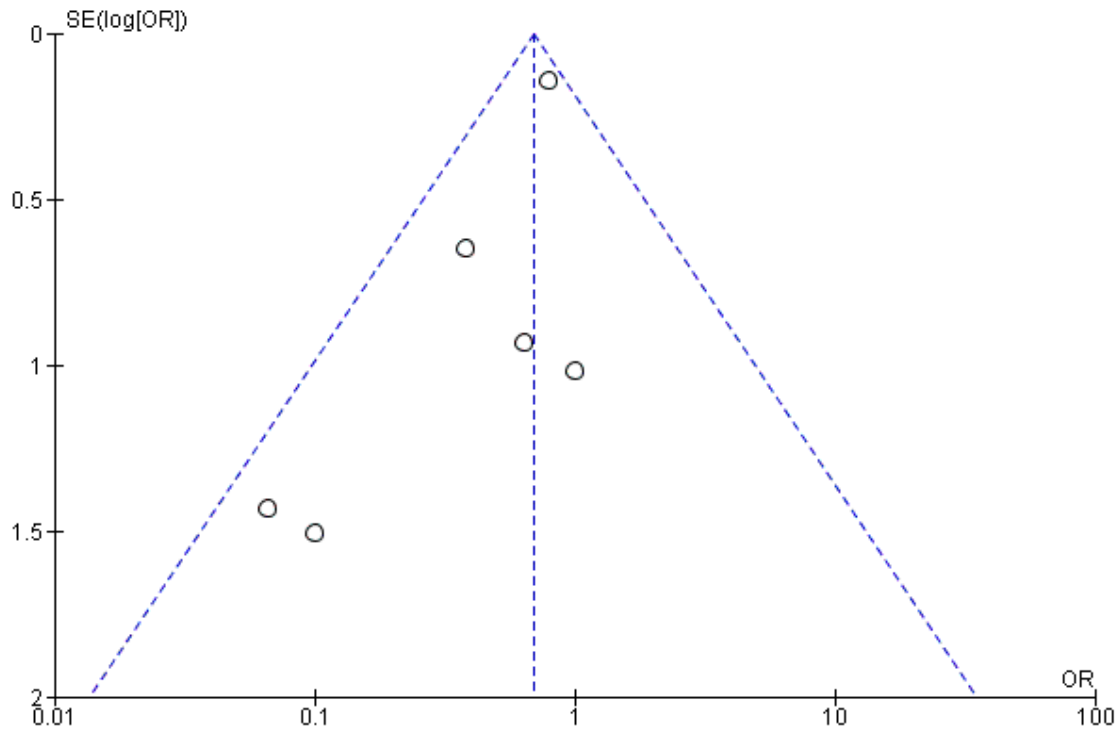

Figure S6. Funnel plot: effect of the NMCR on perinatal mortality

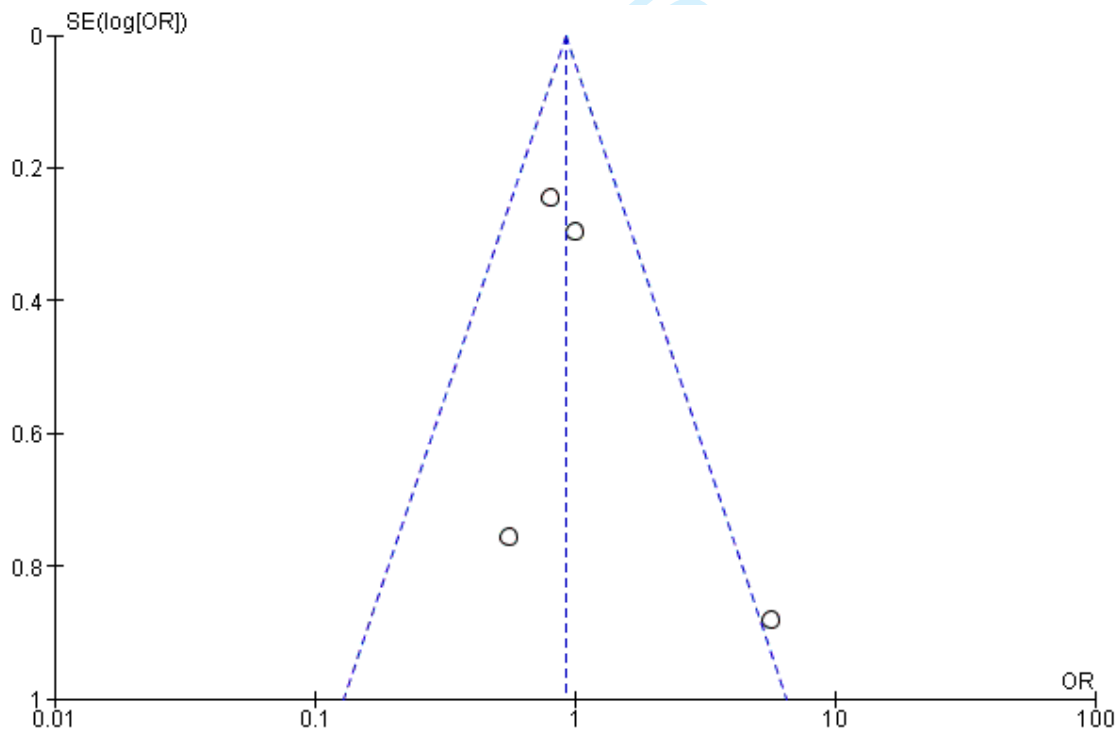

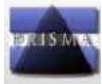

# PRISMA 2009 Checklist

| Section/topic                      | #  | Checklist item                                                                                                                                                                                                                                                                                              | Reported on page # |
|------------------------------------|----|-------------------------------------------------------------------------------------------------------------------------------------------------------------------------------------------------------------------------------------------------------------------------------------------------------------|--------------------|
| <b>TITLE</b>                       |    |                                                                                                                                                                                                                                                                                                             |                    |
| Title                              | 1  | Identify the report as a systematic review, meta-analysis, or both.                                                                                                                                                                                                                                         | 1                  |
| <b>ABSTRACT</b>                    |    |                                                                                                                                                                                                                                                                                                             |                    |
| Structured summary                 | 2  | Provide a structured summary including, as applicable: background; objectives; data sources; study eligibility criteria, participants, and interventions; study appraisal and synthesis methods; results; limitations; conclusions and implications of key findings; systematic review registration number. | 2                  |
| <b>INTRODUCTION</b>                |    |                                                                                                                                                                                                                                                                                                             |                    |
| Rationale                          | 3  | Describe the rationale for the review in the context of what is already known.                                                                                                                                                                                                                              | 4                  |
| Objectives                         | 4  | Provide an explicit statement of questions being addressed with reference to participants, interventions, comparisons, outcomes, and study design (PICOS).                                                                                                                                                  | 5                  |
| <b>METHODS</b>                     |    |                                                                                                                                                                                                                                                                                                             |                    |
| Protocol and registration          | 5  | Indicate if a review protocol exists, if and where it can be accessed (e.g., Web address), and, if available, provide registration information including registration number.                                                                                                                               | 5                  |
| Eligibility criteria               | 6  | Specify study characteristics (e.g., PICOS, length of follow-up) and report characteristics (e.g., years considered, language, publication status) used as criteria for eligibility, giving rationale.                                                                                                      | 5                  |
| Information sources                | 7  | Describe all information sources (e.g., databases with dates of coverage, contact with study authors to identify additional studies) in the search and date last searched.                                                                                                                                  | 5                  |
| Search                             | 8  | Present full electronic search strategy for at least one database, including any limits used, such that it could be repeated.                                                                                                                                                                               | 42 (box 1)         |
| Study selection                    | 9  | State the process for selecting studies (i.e., screening, eligibility, included in systematic review, and, if applicable, included in the meta-analysis).                                                                                                                                                   | 6                  |
| Data collection process            | 10 | Describe method of data extraction from reports (e.g., piloted forms, independently, in duplicate) and any processes for obtaining and confirming data from investigators.                                                                                                                                  | 6                  |
| Data items                         | 11 | List and define all variables for which data were sought (e.g., PICOS, funding sources) and any assumptions and simplifications made.                                                                                                                                                                       | 6                  |
| Risk of bias in individual studies | 12 | Describe methods used for assessing risk of bias of individual studies (including specification of whether this was done at the study or outcome level), and how this information is to be used in any data synthesis.                                                                                      | 6                  |
| Summary measures                   | 13 | State the principal summary measures (e.g., risk ratio, difference in means).                                                                                                                                                                                                                               | 6                  |
| Synthesis of results               | 14 | Describe the methods of handling data and combining results of studies, if done, including measures of consistency (e.g., $I^2$ ) for each meta-analysis.                                                                                                                                                   | 6                  |



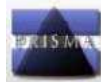

# PRISMA 2009 Checklist

Page 1 of 2

| Section/topic                 | #  | Checklist item                                                                                                                                                                                           | Reported on page #      |
|-------------------------------|----|----------------------------------------------------------------------------------------------------------------------------------------------------------------------------------------------------------|-------------------------|
| Risk of bias across studies   | 15 | Specify any assessment of risk of bias that may affect the cumulative evidence (e.g., publication bias, selective reporting within studies).                                                             | 6                       |
| Additional analyses           | 16 | Describe methods of additional analyses (e.g., sensitivity or subgroup analyses, meta-regression), if done, indicating which were pre-specified.                                                         | 6                       |
| <b>RESULTS</b>                |    |                                                                                                                                                                                                          |                         |
| Study selection               | 17 | Give numbers of studies screened, assessed for eligibility, and included in the review, with reasons for exclusions at each stage, ideally with a flow diagram.                                          | 7<br>Figure 1           |
| Study characteristics         | 18 | For each study, present characteristics for which data were extracted (e.g., study size, PICOS, follow-up period) and provide the citations.                                                             | Table 1-2               |
| Risk of bias within studies   | 19 | Present data on risk of bias of each study and, if available, any outcome level assessment (see item 12).                                                                                                | Table S1                |
| Results of individual studies | 20 | For all outcomes considered (benefits or harms), present, for each study: (a) simple summary data for each intervention group (b) effect estimates and confidence intervals, ideally with a forest plot. | Table 3-4<br>Figure 1-2 |
| Synthesis of results          | 21 | Present results of each meta-analysis done, including confidence intervals and measures of consistency.                                                                                                  | 8<br>Figure 1-2 e S1-S4 |
| Risk of bias across studies   | 22 | Present results of any assessment of risk of bias across studies (see Item 15).                                                                                                                          | 9<br>Table S2           |
| Additional analysis           | 23 | Give results of additional analyses, if done (e.g., sensitivity or subgroup analyses, meta-regression [see Item 16]).                                                                                    | 9<br>Figure S1-S6       |
| <b>DISCUSSION</b>             |    |                                                                                                                                                                                                          |                         |
| Summary of evidence           | 24 | Summarize the main findings including the strength of evidence for each main outcome; consider their relevance to key groups (e.g., healthcare providers, users, and policy makers).                     | 10                      |
| Limitations                   | 25 | Discuss limitations at study and outcome level (e.g., risk of bias), and at review-level (e.g., incomplete retrieval of identified research, reporting bias).                                            | 10-11                   |
| Conclusions                   | 26 | Provide a general interpretation of the results in the context of other evidence, and implications for future research.                                                                                  | 10-13                   |

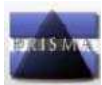

# PRISMA 2009 Checklist

1  
2  
3  
4  
5  
6  
7  
8  
9  
10  
11  
12  
13  
14  
15  
16  
17  
18  
19  
20  
21  
22  
23  
24  
25  
26  
27  
28  
29  
30  
31  
32  
33  
34  
35  
36  
37  
38  
39  
40  
41  
42  
43  
44  
45  
46  
47

| FUNDING |    |                                                                                                                                            |    |
|---------|----|--------------------------------------------------------------------------------------------------------------------------------------------|----|
| Funding | 27 | Describe sources of funding for the systematic review and other support (e.g., supply of data); role of funders for the systematic review. | 14 |

From: Moher D, Liberati A, Tetzlaff J, Altman DG, The PRISMA Group (2009). Preferred Reporting Items for Systematic Reviews and Meta-Analyses: The PRISMA Statement. PLoS Med 6(7): e1000097. doi:10.1371/journal.pmed1000097

For more information, visit: [www.prisma-statement.org](http://www.prisma-statement.org).

Page 2 of 2

For peer review only

# BMJ Open

## Effectiveness of the facility based maternal near-miss case reviews in improving maternal and newborn quality of care in low and middle income countries: a systematic review

|                                 |                                                                                                                                                                                                                                                                                                                                                                                                                              |
|---------------------------------|------------------------------------------------------------------------------------------------------------------------------------------------------------------------------------------------------------------------------------------------------------------------------------------------------------------------------------------------------------------------------------------------------------------------------|
| Journal:                        | <i>BMJ Open</i>                                                                                                                                                                                                                                                                                                                                                                                                              |
| Manuscript ID                   | bmjopen-2017-019787.R2                                                                                                                                                                                                                                                                                                                                                                                                       |
| Article Type:                   | Research                                                                                                                                                                                                                                                                                                                                                                                                                     |
| Date Submitted by the Author:   | 01-Feb-2018                                                                                                                                                                                                                                                                                                                                                                                                                  |
| Complete List of Authors:       | Lazzerini, Marzia; Institute for Maternal and Child Health IRCCS Burlo Garofolo, WHO Collaborating Centre<br>Richardson, Sonia ; Institute for Maternal and Child Health IRCCS Burlo Garofolo, WHO Collaborating Centre<br>Ciardelli, Valentina ; Department of obstetrics and gynaecology, Bentivoglio Hospital<br>Erenbourg, Anna ; Institute for Maternal and Child Health IRCCS Burlo Garofolo, WHO Collaborating Centre |
| <b>Primary Subject Heading</b>: | Global health                                                                                                                                                                                                                                                                                                                                                                                                                |
| Secondary Subject Heading:      | Health services research                                                                                                                                                                                                                                                                                                                                                                                                     |
| Keywords:                       | Quality in health care < HEALTH SERVICES ADMINISTRATION & MANAGEMENT, Clinical audit < HEALTH SERVICES ADMINISTRATION & MANAGEMENT, Maternal medicine < OBSTETRICS                                                                                                                                                                                                                                                           |
|                                 |                                                                                                                                                                                                                                                                                                                                                                                                                              |

SCHOLARONE™  
Manuscripts

# Effectiveness of the facility based maternal near-miss case reviews in improving maternal and newborn quality of care in low and middle income countries: a systematic review

**Running title:** Effectiveness of NMCR on maternal and newborn quality of care in LMIC

Marzia Lazzerini,<sup>1</sup> Sonia Richardson,<sup>1</sup> Valentina Ciardelli,<sup>2</sup> Anna Erenbourg.<sup>1</sup>

<sup>1</sup> WHO Collaborating Centre for Maternal and Child Health, Institute for Maternal and Child Health IRCCS Burlo Garofolo, Via dell' Iстриa 65/1, 34137, Trieste, Italy.

<sup>2</sup> Department of obstetrics and gynaecology, Bentivoglio Hospital, Via Marconi, 35, 40010 Bentivoglio, Italy

## Authors' e-mail contacts for the online submission

ML: marzia.lazzerini@burlo.trieste.it

SR: sonia.richardson@burlo.trieste.it

VC: valenrico98@gmail.com

AE: anna.erenbourg@burlo.trieste.it

## Corresponding author

Marzia Lazzerini DTMH, MSc, PhD

WHO Collaborating Centre for Maternal and Child Health

Institute for Maternal and Child Health IRCCS Burlo Garofolo

Via dell'Iстриa 65/1, 34137, Trieste, ITALY

Tel: +39 040 3785 555

Fax: +39 040 3785 260

marzia.lazzerini@burlo.trieste.it

Abstract word count: 292

Text word count: 4384

## ABSTRACT

### Objectives

The maternal near-miss case review (NMCR) has been promoted by WHO as an approach to improve quality of care (QoC) at facility level. This systematic review synthesizes evidence on the effectiveness of the NMCR on QoC and maternal and perinatal health outcomes in low and middle-income countries (LMIC).

### Methods

Studies were searched for in six electronic databases (MEDLINE, Index Medicus, Web of Science, the Cochrane library, Embase, LILACS), with no language restrictions. Two authors independently screened papers and selected them for inclusion and independently extracted data. Maternal mortality was the primary outcome. Secondary outcomes included any outcome informing on any of the six dimensions of quality of care: efficacy, safety, efficiency, equity, accessibility and timely care, acceptability and patient-centered care.

### Results

Out of 24,822 papers retrieved, 17 studies from 11 countries were included. Maternal mortality measured before and after the implementation of the NMCR cycle significantly decreased (odds ratio (OR) 0.77, 95%CI 0.61 to 0.98, eight studies, 5,5573,043 women;  $I^2= 39\%$ ). A statistically significant reduction in the incidence of uterine rupture, post-partum haemorrhage, and maternal sepsis was observed in three out of six studies. Ten studies reporting on maternal care process all showed some significant improvement when measured against pre-defined standards. All studies reported that the NMCR resulted in some amelioration of the facility structure (physical structure, staffing, equipment, training, organization of care). Newborn outcomes were overall poorly reported; four studies showed no significant difference in perinatal mortality. Patient satisfaction and equity were also poorly reported.

### Conclusions

Policy makers may consider implementing the maternal NMCR cycle approach among strategies aiming at improving QoC and reducing maternal mortality and morbidity in LMIC. Future studies should better document the effectiveness of the NMCR cycle particularly on outcomes reflecting patient-centered care and cost-effectiveness.

### Article summary: strengths and limitations of this study

- The maternal near-miss case review (NMCR) approach has been used in different settings; however, so far no systematic review has ever reported on its effectiveness. The present review fills an existing gap in evidence synthesis by reporting latest evidence on the effectiveness of NMCR cycle as a type of criterion base audit in low and middle-income countries (LMIC).
- Findings of this review are limited by the paucity of existing scientific literature: despite the NMCR approach has been utilised in many countries, such as China, India, South Africa and the WHO European Region, scientific literature reporting on the NMCR effectiveness is relatively scarce.
- Despite the above described limitations, this review collected an appreciable number of studies reporting on the impact of the NMCR cycle from different regions worldwide, including Africa, Central Asia, South East Asia, Latin America and Caribbean- and adds as new knowledge that this approach may be effective in reducing maternal mortality, and in improving quality of maternal and newborn health care at facility level.

### Keywords

Near miss case review; quality of care; maternal health; perinatal health; low and middle income countries

### Disclosure of interests

No competing interest

### List of abbreviations

CBAs= controlled before-and after studies

CCTs= controlled clinical trials

ITSs= and intermittent time series

LMIC = low and middle-income countries

NMCR= Near miss cases review

OR= odds ratio

QoC= Quality of care

RCTs= randomised controlled trials (RCTs)

UCBAs=uncontrolled before and after studies

WHO = World Health Organization

## BACKGROUND

Ensuring adequate quality of health care is a primary objective of the World Health Organization (WHO) Global Strategy for Women's, Children's and Adolescent's Health 2016-2030 (1,2). Quality in health care is recognized by WHO as essential for the health and well-being of the population, and as a basic aspect of human rights (2,3).

Among different approaches aiming at improving quality of care in maternity services, the maternal near-miss cases review (NMCR) approach was promoted by WHO and partners since 2004 within the strategy Beyond the Numbers (4). The facility-based individual NMCR cycle is defined as a type of criterion-based audit seeking to improve maternal and perinatal health care and outcomes by conducting a review, at hospital level, of the care provided to maternal near-miss cases (5). A maternal near miss case is defined as a woman who nearly died but survived a complication that occurred during pregnancy, childbirth or within six weeks after pregnancy (5).

In the last 20 years, NMCR have been promoted as an alternative way to audit case management, more acceptable for health workers than mortality audits, which have been in use for many years (4,5). As a matter of fact, in low mortality settings or at the health service level, the number of maternal deaths is usually insufficient or not representative enough to allow reliable policy guidance (4). Moreover, discussing cases of deaths may have legal implications and may be perceived as challenging by hospital staff (4). Near-miss cases occur more frequently than maternal deaths, their review can directly inform on both strengths and weakness in the process of care, and it is usually perceived by staff as easier to perform than mortality audits (5,6).

The objective of the NMCR cycle is to identify areas amenable of improving quality of care, and finding and implementing solutions to the problems identified. Actions for improving quality of care are proposed and agreed by hospital staff, and subsequently monitored to check their implementation (5). This bottom-up approach aims at ensuring local ownership and facilitating team-building dynamics (5). Beside reviewing clinical management the NMCR can cover other domains involved with delivery of care, including availability of essential equipment, staffing, training, policies and organization of services (5). According to the WHO guidance (5) patients' experience of care should be collected through interviews and taken into account in developing recommendations aiming at improving quality of care.

The NMCR approach has been used in different settings (5); however, so far no systematic review has ever reported on its effectiveness. The objective of this review is to systematically evaluate and synthesise the evidence on the effectiveness of the NMCR cycle on the quality of care and on

maternal and perinatal health outcomes in low and middle-income countries (LMICs).

## METHODS

### Search strategy and eligibility criteria

In conducting this review we followed the guidelines reported in the PRISMA (Preferred Reporting Items for systematic reviews and meta-analyses) (7). A protocol including detailed methods of the review was developed before starting the review.

We searched up to September 2017 the following databases: MEDLINE through Pubmed (from 1956); LILACS (no date restrictions); Global Index Medicus (no date restrictions); Science Citation Index Expanded (SCI-EXPANDED) through Web of Science (no date restrictions); Social Sciences Citation Index (SSCI) through Web of Science (no date restrictions); Cochrane library (no date restrictions); Embase through OVID (from 1996). The search strategy is reported in **Box 1**. Manual searches of reference lists were also performed. We did not apply any language restrictions.

Studies were eligible for inclusion if they reported on the effectiveness (outcome) on maternal and perinatal health care (population) of the individual NMCR cycle at facility level (intervention), in a LMIC (setting), defined as for the World Bank definition at the time of the study (8). Given the paucity of randomised controlled trials (RCTs) on the subject, we also opted to include in this review non-randomized controlled clinical trials (CCTs), controlled before-and after studies (CBAs), uncontrolled before and after studies (UCBAs) and intermittent time series (ITSs). Qualitative studies were excluded. Both studies using the WHO definition of a maternal near-miss case published in year 2011 (9) or previous/locally adapted definitions, such as locally developed disease-specific definitions, were included. Studies reporting on interventions where the full audit cycle was implemented (ie including implementation of changes) were included, while studies only reporting descriptive findings of the case review (ie identifications of gaps in case management without developing and implementing recommendations) were not eligible. Abstracts and unpublished reports were also not eligible for inclusion.

Maternal mortality was predefined as our primary outcome. Secondary outcomes included any outcome informing on any of the six dimensions of quality of care (10), namely: efficacy (eg maternal morbidity), safety (eg adverse events), efficiency (cost), equity (eg equitable care), accessibility and timely care (eg access to care), acceptability and patient-centered care (eg patient satisfaction). Effectiveness on the quality of care is reported according the Donabedian model of quality improvement, which differentiates between: i) outcomes of care (eg health



1  
2 outcomes, costs, satisfaction), ii) process of care (eg diagnosis and treatment); iii) and  
3 inputs/structure (eg physical structure, staffing, equipment and supplies, training, policies and  
4 organization of care) (11).  
5  
6  
7

## 8 **Data collection and analysis**

9

10 Studies were selected for inclusion by two independent authors in two teams (VC and AE, ML and  
11 SR). Any disagreement was resolved through discussion. The full text of all eligible citations was  
12 examined in detail. Two authors (ML, SR) extracted data from included studies, using a pre-piloted  
13 data-extraction form. Disagreements were resolved by discussion between the two authors and  
14 consensus with a third author.  
15  
16  
17

18  
19 We extracted information regarding: study setting, design and duration; characteristics of the  
20 intervention; type of outcomes evaluated; effectiveness of the NMCR on the outcomes. For the  
21 study with ITS design we included in the meta-analysis of maternal mortality the first and the last  
22 time point reported. Data on effectiveness were extracted as crude numbers or percentages. Data  
23 on maternal mortality were extracted as disease-specific maternal mortality when case reviews  
24 focused only on specific diseases, and as total maternal mortality when case reviews included all  
25 major obstetric emergencies.  
26  
27  
28  
29  
30

31 When meta-analysis was possible and appropriate, for each outcome factor we generated a  
32 pooled odds ratio (OR) using the Mantel-Haenszel weighting method (12). Pooled data were  
33 presented in forest plots; data that could not be meta-analyzed was presented in tables and text.  
34 We tested the null hypothesis that all studies evaluate the same true effect by the Cochran's Q  
35 test, with two-sided  $p < 0.05$  considered statistically significant. The degree of heterogeneity  
36 between studies was assessed by visual inspection of the forest plots and I-squared (I<sup>2</sup>) statistic  
37 with its 95% confidence intervals, and interpreted according to the Cochrane manual (12).  
38  
39  
40  
41  
42

43 The Cochrane 'Risk of bias' tool modified with the Cochrane Effective Practice and Organization of  
44 Care Group (EPOC) criteria for ITSs (12) was used to assess the risk of bias in included studies.  
45 We aimed at performing the following sensitivity analyses: i) removing the studies with high risk of  
46 bias; ii) removing studies including less than 300 cases and less than 30 events (ie cases of  
47 maternal death or perinatal death). We performed a subgroup analysis exploring the effect of  
48 NMCR in low-income countries (defined as for the World Bank definition at the time of the study  
49 (8)) compared to middle income countries.  
50  
51  
52  
53  
54  
55  
56  
57  
58  
59  
60

## RESULTS

### Characteristics of the studies

The search yielded overall 24,822 records (**Figure 1**). Overall 17 papers (13-29) from Africa (Ghana, Ethiopia Malawi, Nigeria, Tanzania, Uganda), Europe and Central Asia (Kazakhstan, Moldova), South East Asia (Malaysia, Vietnam) and Latin America and Caribbean (Jamaica) met the inclusion criteria.

Characteristics of the study settings and design are summarized in **Table 1**. All except one study (23) were published during the last 15 years. Two papers referred to the same experience (20, 21); findings from these studies are jointly reported in the tables, and we used the most recent reference (20) to identify them. All studies were uncontrolled before and after-studies (UCBAs), describing the effectiveness of the NMCR cycle with a before and after analysis, except for two studies with ITS design (13, 22). Studies duration ranged from a minimum of 6 months (27) to a maximum of 26 months (29). Ten studies were held in an urban setting (13-17,19,20,25,28,29), three in a rural setting (22,24,27), and three in a mixed setting (18,23,26). One study was multi-centered (Ghana and Jamaica) (29). Among the 16 experiences reported, nine were of large size: one very large study In Malawi included 73 facilities in three districts (26); another three studies in Malawi enrolled respectively 29 and 13 facilities of different level and type (22,27), while one was conducted in one referral hospital plus several (number not further specified) health centres (24); a study in Ethiopia involved 10 public hospitals (17); studies in Kazakhstan, Vietnam, Ghana, Jamaica and Moldova involved six, five, four and three hospitals respectively (20,23,29,18). The remaining seven studies were single-center studies and took place in one teaching/tertiary level care hospital each.

Characteristics of the intervention are summarized in **Table 2**. In about half of the studies, cases were audited prospectively (15,17,18,20,22,24-26), while in the other studies audits were either conducted retrospectively (12,13,27), or retrospectively in a first phase then prospectively in the second phase (16,19,23,28,29). While in all cases the internal staff within the facility was involved in developing the recommendations, studies differed by who performed the case reviews: in most experiences audits were conducted by internal staff within the facility/ies, with the exception of four cases where a study investigator/physician audited the cases against pre-defined criteria and later presented it to hospital staff (13,19,25,29) and two cases where this information was not specified (15,16). Type of obstetric complications selected for audit included: severe pre-eclampsia/eclampsia (13,16,19,22,23,25-29), post-partum haemorrhage (13,20,22,23,25-27,29), obstructed labour (14,15,23,26,27,29), uterine rupture (24,25,29), infections (23,25,27),

1 complications of abortion (27). Five studies focused on one complication only (14-16,24,28) while  
2 in all other studies more than one condition was audited. In three studies, cases of maternal  
3 mortality were audited together with cases of near-miss (17,22,26). The criteria for case selection  
4 was “all cases occurring in the study period”, except in one experience in Malawi where cases of  
5 particular educational interest were selected (24), and a study in Moldova where, despite no pre-  
6 defined criteria, it was observed that cases “more likely to lead to praises for the maternity team”  
7 were selected (18). The number of total cases audited in each study ranged widely, from 30 cases  
8 (18) to 2568 cases (17).

14  
15 Only in four experiences, women were interviewed (14,15,18,20), but in one of them this was  
16 explicitly merely for recording bureaucratic details (15), rather than for the purpose of collecting  
17 women views and perspectives on quality of care received. All studies associated the audits with  
18 the development or implementation of standards of care (used also in most cases to perform the  
19 audits), while few studies also associated additional interventions for the hospital staff, such as  
20 development/dissemination of guidelines, and training on case management (13,15, 23).

25  
26 As reported in **Table S1**, types of outcomes evaluated in the studies reported mostly on two  
27 dimensions of quality of care (10): effectiveness and accessibility and timely care. Outcomes  
28 related to the other dimension of quality of care, such as patient centrality and acceptability (eg  
29 patient satisfaction), efficiency and equity, safety (eg rate of adverse events, incident reporting)  
30 were not explored, with the exception of one study in Kazakhstan reporting on improved patients  
31 satisfaction (20) and one in Moldova reporting improved attitude towards patients (18).

## 36 **Effectiveness of the NMCR cycle**

### 39 ***Effectiveness on health outcomes***

41  
42 In a meta-analysis including eight studies, maternal mortality, measured before and after the  
43 implementation of the NMCR cycle, significantly decreased (OR 0.77, 95%CI 0.61 to 0.98,  
44 5,5573,043 women, **Figure 2**), with relatively low heterogeneity between studies ( $I^2= 39\%$ ). An  
45 additional study from Uganda reported to have observed a reduction in maternal mortality, but data  
46 were not further made explicit (15).

47  
48 Three out of six studies reported a statistically significant reduction in the incidence of the following  
49 preventable obstetric complications: uterine rupture, major post-partum haemorrhage, and  
50 maternal sepsis (**Table 3**).

51  
52 Newborn outcomes were overall poorly reported. Of five studies documenting perinatal mortality,  
53  
54  
55

fours could be included in the meta-analysis, showing no significant differences in perinatal deaths in the before and after period (OR 0.92, 95%CI 0.65, 1.30, **Figure 3**) with low heterogeneity between studies ( $I^2= 40\%$ ). The fifth study (14), conducted in Uganda, reported a significant reduction in the incidence of a combined outcome including perinatal severe morbidities, deaths and stillbirths (**Table 3**). Only one study reported on number of newborns admitted to ICU, without statistical difference in the before and after NCMR period (15). Another single study reported on Apgar score birth weight, without changes in the before and after period (16).

One study reported increased patient satisfaction after the implementation of the NMRC cycle (20).

### ***Effectiveness on process outcomes***

The effectiveness of the NMCR on the process of care is synthesized in **Table 3**. Ten studies reported on the process of care when measured quantitatively against pre-defined standards and all showed some significant improvements (13-16,19,23,25,27,28,29). Six studies reported other findings, such as improved case documentation, case-referral, use of partograph, monitoring, and improved team work (14,17,18,20,22,26).

### ***Effectiveness on structure outcomes***

Effectiveness on the structure is detailed in **Table 4**. All studies reported some improvements in one or more domains. Overall most frequent changes relate to: purchasing of essential equipment and supplies; additional training, monitoring and supervision; policies and organization of care including reorganisation of staff and their duties, implementation of systems aiming at standardising case management through dissemination of guidelines, checklists and monitoring forms, better coordination among different services.

### ***Risk of bias and other analyses***

All studies were rated as a high risk of bias based on the Cochrane and EPOC criteria (**Table S2**), mostly due to the study design (NCBA or ITS studies).

The sensitivity analysis showed that when studies with a very small sample size were excluded, the effect of the NMCR on maternal mortality becomes stronger than when all studies were included (OR 0.71, 95%CI 0.55 to 0.90, three studies  $I^2=86\%$  **Figure S1**). The effect of NMCR on perinatal mortality did not significantly change in the sensitivity analysis (**Figure S2**).

Thirteen studies were held in low-income countries (13-15,17,19,22-27,28,29), two in upper middle-income countries (16,20), and one in a lower middle-income country (18) (**Table S3**). In the subgroup analysis, the effect of NMCR on maternal mortality was statistically significant in low

1  
2 income countries (R 0.77, 95%CI 0.60 to 0.98, 7 studies), while only one small study could be  
3 included in the category of middle income countries, without statistical significance (**Figure S3**).  
4 The effect of NMCR on perinatal mortality was not affected by subgroup analysis (**Figure S4**).  
5  
6 Funnel plots did not suggest publication bias (**Figure S5 and S6**).  
7

## 8 9 **DISCUSSION**

10  
11  
12 This review suggests that the facility based individual maternal NMCR cycle may be an effective  
13 strategy for reducing maternal mortality in high burden countries, and for improving overall quality  
14 of maternal care in LMIC. Results of a pooled analysis of findings from eight studies showed that  
15 the NMCR cycle significantly reduced maternal mortality (OR 0.77, 95%CI 0.61 to 0.98, **Figure 2**),  
16 with relatively low heterogeneity of results ( $I^2=39\%$ ). Three out of six studies reported a significant  
17 reduction in the incidence of preventable obstetric complications such as uterine rupture, major  
18 post-partum haemorrhage, and maternal sepsis. Out of ten studies reporting on the process of  
19 care when measured against pre-defined standards all showed some statistically significant  
20 improvement. Additionally, in all studies the implementation of the NMCR cycle resulted in some  
21 amelioration in the structure of the hospital, such as an increased availability of essential  
22 equipment and supplies, additional training, monitoring and supervision, and the implementation of  
23 new policies and better organization of services.  
24  
25  
26  
27  
28  
29  
30

31  
32 Previous systematic reviews had observed a benefit of criterion-base audits in improving the  
33 quality of obstetric care (30-32). However, a review on the effectiveness of criterion-base audits in  
34 LMIC published some years ago concluded that, despite criterion-base audits being increasingly  
35 used, few studies had reported on their effectiveness (33). The present review retrieved all latest  
36 evidence on the effectiveness of NMCR cycle as a type of criterion-based audit, synthesized  
37 studies from LMIC in different geographical regions- including Africa, Central Asia, South East  
38 Asia, Latin America and Caribbean- and adds as new knowledge that this approach may be  
39 effective in reducing maternal mortality and in improving quality of health care provided.  
40  
41  
42  
43  
44

45 Findings of this review are limited by the paucity of existing scientific literature: the NMCR  
46 approach has been utilized in many more countries than could be included in this reviews, such as  
47 China (34), India (35), South Africa (36), and the WHO European Region (37-41), but scientific  
48 literature reporting on the NMCR effectiveness in these countries could not be retrieved. Secondly,  
49 all included studies had an UCBA or ITS design, thus being exposed to a high risk of bias  
50 (although most studies checked for potential confounding factors, such as the case mix in the  
51 before and after phase). Despite these limitations, this review collected an appreciable number of  
52 studies, including also some large studies (17,22,26,27), reporting on the impact of the NMCR  
53  
54  
55  
56  
57

1  
2 cycle from different regions worldwide. Although quantitative findings of the review were to some  
3 extent affected by one large study (26), it must be acknowledge that results of most studies were in  
4 the same direction (figure 1), and in all studies some significant gains, either in the standards of  
5 care or in the process outcomes, were observed. In some studies, a significant benefit in maternal  
6 mortality or in standards of care could not be detected because in-hospital maternal mortality was  
7 too low (18,20) or because standards of care were already good at the baseline (13,23,27). Ideally,  
8 it will be advisable to perform large multicenter RCTs to properly document NMCR effectiveness.  
9 However, in practice conducting a RCT on criterion-based audit alone may be challenging, and  
10 may even be perceived as unethical, if no appropriate comparison is chosen. This is because in  
11 current practice criterion based audits are already one of the recommended strategies to improve  
12 quality of care promoted by many agencies and bodies, such as the National Institute for Clinical  
13 Excellence (NICE) (42). Notably, the review of “near-miss” cases is already recommended by  
14 WHO as a “key action to eliminate avoidable maternal and perinatal mortality and morbidity and  
15 improve the quality of care” (43) and as such it is already implemented in several countries.  
16  
17  
18  
19  
20  
21  
22  
23

24 The audit of maternal near miss cases is an approach also utilized in several high-income settings:  
25 UK has a well-established programme of confidential enquiries into maternal deaths and a national  
26 system for research on maternal near-miss-the UK Obstetric Surveillance System (UKOSS)  
27 (44,45); New Zealand established a national system for severe maternal morbidity review (46);  
28 several countries within the International Network of Obstetric Survey Systems (INOSS) are  
29 collecting data on severe maternal morbidities for study purposes (47), while other countries such  
30 as Italy (ITOSS) are starting the implementation of near-miss audits (48,49). Although there are  
31 some differences in the type of interventions applied (eg not all of these approaches are facility  
32 based), still the existence of these large networks on maternal near miss case reviews and the  
33 amount of resources devoted to them somehow testify the importance recognized in reviewing  
34 near miss cases.  
35  
36  
37  
38  
39  
40  
41

42 In the future, rather than investing resources in exploring whether near miss audits or criterion-  
43 based audits in general are overall effective, it will be more interesting to explore which  
44 characteristics make them effective and sustainable. Available literature synthesised in this review  
45 does not allow for directly comparing the effectiveness of different methodologies on how to  
46 perform audits in practice, but at least it does provide some useful starting point for discussion and  
47 for future research. First, with regards to the number of cases audited, this varied largely in the  
48 included studies from a minimum of less than 10 cases per year (18,20) to a maximum of several  
49 hundred cases in a few months (14,29), with a third approach consisting in performing a large  
50 retrospective review of past cases as the baseline, and then collecting fewer new cases  
51 prospectively. When many cases were reviewed, this allowed for an in depth description of the  
52  
53  
54  
55  
56  
57  
58  
59  
60

1  
2 gaps in care. However, the analysis of a large number of cases does not necessarily ensure the  
3 development of good recommendations for quality improvement, neither their implementation.  
4 Additionally, the sustainability of auditing on a large number of cases, outside a research setting  
5 with dedicated human and economic resources, is questionable. Studies included in this review  
6 suggest that even the periodic review of few cases may help identifying gaps in routine care,  
7 developing SMART recommendations (ie Specific, Measurable, Achievable, Realistic, Time-bound  
8 (50)), and improving quality of care significantly (18,20). WHO recommends to organise one  
9 session of NMCR per month, and to review in each session few cases (one or two), but pretends a  
10 high quality in the process: each session should start by checking if previous recommendations  
11 have been implemented; there should be a in depth discussion of the underlying causes of the  
12 near miss event (“why but why” approach); recommendations should be SMART; regular sessions  
13 should be organised; dissemination of results should be ensured, etc (5). At first few facilities  
14 should be selected for pilot implementation, and the NMCR approach should be further scaled up  
15 only when quality in the process has been ensured.  
16  
17  
18  
19  
20  
21  
22  
23

24 Secondly, studies included in this review revealed that most experiences of implementation of  
25 NMCR cycles were externally supported, either by the WHO, academia, and/or other development  
26 partners (15,18,20-24,26-28). This is in line with other existing literature (51,52) highlighting that in  
27 particular the second part of the audit cycle (ie developing recommendations, implementing them,  
28 checking on progress) is in general problematic and usually less well conducted compared to the  
29 first part of the audit cycle. The attitude to openly discuss cases within a multidisciplinary team and  
30 agreeing solutions was described as challenging in different settings, especially for mid-level staff  
31 (midwives, nurses) who may not be used to voice their views in the presence of doctors and  
32 managers (18,20). Hospital staff, managers included, often do not receive any formal training in  
33 quality improvement methods or any guidance in correctly performing an audit cycle. The need for  
34 ensuring sustained external support, and for establishing a functional quality assurance  
35 mechanism, are recognised by WHO as crucial for ensuring an effective NMCR implementation  
36 (5).  
37  
38  
39  
40  
41  
42  
43  
44

45 Thirdly, although having a single person appointed to perform the case-review - as performed in  
46 some studies included in this review (18,10,25,29) - may increase feasibility, this actually largely  
47 reduces ownership of the process, together with minimizing occasions for discussion and team  
48 building among staff. Studies noted that involvement of all health care providers in the audit  
49 process promoted successful implementation, ownership and sustainability of the process  
50 (14,20,28). The involvement of mid level staff such as nurses and midwives was reported to result  
51 in improved staff autonomy and team work (14,21,27). Some studies observed that participation of  
52 the senior management promoted the implementation of recommendations that required allocation  
53  
54  
55  
56  
57  
58  
59  
60

1  
2 of resources and changes in policies and organisation of care (26,28). Currently the WHO  
3 approach (5) recommends the NMCR to be performed by the staff who managed the cases,  
4 including nurses, midwives, and any other staff directly or indirectly involved in case management.  
5  
6

7  
8 Fourthly, the patient experience of care was assessed only in very few of the existing studies, and  
9 yet not fully taken into account. In the last few years, WHO has given increasing importance to  
10 patient experience of care (1). Listening to women's views may provide important information, as  
11 testified by studies in Brazil, Rwanda and the UK (53-55) and by a study in Iran where women's  
12 views were successfully used to improve quality of care (56). Currently WHO recommends to  
13 always interview women and their families and to use their inputs for improving care (5).  
14  
15  
16

17  
18 Finally, as pointed out by authors of the included studies, interventions aiming at improving quality  
19 of care without strengthening the health systems and improving community awareness may have  
20 minimal success (15,22). A study in Malawi reported that availability of essential supplies, such as  
21 blood for transfusions, remained low even after the NMCR due to health system failures and this  
22 clearly was a barrier for improving case management (22). Qualitative findings, collected through  
23 focus groups among staff in a study in Uganda (15), pointed out, among issues that may have  
24 hampered the effectiveness of NMCR, health facility factors such as: stock-out of essential  
25 supplies, shortage of human resources, lack of task allocation, inadequate supervision. However,  
26 in most studies, even if the number of staff and available resources remained stable in the before  
27 and after phase, as a result of the audit there was a reorganization of staff activities, such as better  
28 specification of roles and responsibilities, task shifting, and improved communication  
29 (14,16,17,20,28).  
30  
31  
32  
33  
34  
35  
36  
37

38 Cost of the NMCR approach in improving health outcomes and quality of care was not formally  
39 evaluated in the retrieved studies. However, several papers stated that the NMCR was an  
40 inexpensive and simple intervention, requiring little technology (24,26-28). A study involving 12  
41 health centres in Malawi reported that each audit meeting cost about 150 US \$, including foods  
42 and transport of participants to the District Hospital (27). Another study in Uganda stated "the audit  
43 process had challenged the assumption that all quality improvements need to be externally  
44 provided and are expensive" (28). These findings are in line with a systematic review of barriers  
45 and facilitators for effective NMCR implementation, reporting that a relatively low budget is needed  
46 to facilitate activities (37). In some experiences, the NMCR improved use or availability of existing  
47 economic resources: in Malawi, it "promoted a wiser allocation of resources for maternity care at  
48 the district level" (27); in Uganda a fundraising committee was established to raise funds for drugs  
49 and equipment needed according to the recommendations (28).  
50  
51  
52  
53  
54  
55  
56  
57  
58  
59  
60



## CONCLUSIONS

### *Implication for policy and research*

Among other strategies to reduce maternal mortality and morbidity and for improving the quality of maternal and perinatal care, policy makers may consider the implementation of the maternal NMCR cycle approach.

Researchers should aim at generating more evidence on how to effectively implement the NMCR cycle, how to improve its impact on newborn outcomes and on outcomes reflecting patients' centrality (such as patient satisfaction and/or perception of quality of care received), together with documenting the cost effectiveness of the NMCR approach.

### **Funding**

This review was funded by a grant from the GREAT Network, Canadian Institutes of Health Research, St. Michael's Hospital, Toronto.

### **Conflict of interest**

None

### **Role of authors**

ML conceived the papers, screened the study, extracted data, drafted the paper and finalised the paper. SR, VC, AE screened the study, extracted data and revised the first draft.

### **Data Sharing statement**

All details of the analyses conducted are provided within the manuscript

## REFERENCES

1. Tunçalp O, Were WM, MacLennan C, Oladapo OT, Gülmezoglu AM, Bahl R, Daelmans B, Mathai M, Say L, Kristensen F, Temmerman M, Bustreo F. Quality of care for pregnant women and newborns—the WHO vision. *BJOG*. 2015 ;122:1045-9.
2. World Health Organization. Global Strategy for Women's, Children's and Adolescent's Health 2016-2030 Available at <http://www.who.int/life-course/partners/global-strategy/global-strategy-2016-2030/en/> (accessed Sept 15, 2017)
3. World Health Organization (WHO). The prevention and elimination of disrespect and abuse during facility-based childbirth. World Health Organization, Geneva, 2014. Available at [http://apps.who.int/iris/bitstream/10665/134588/1/WHO\\_RHR\\_14.23\\_eng.pdf?ua=1&ua=1](http://apps.who.int/iris/bitstream/10665/134588/1/WHO_RHR_14.23_eng.pdf?ua=1&ua=1) (accessed Sept 15, 2017)
4. World Health Organization. Beyond the numbers: Reviewing maternal deaths and complications to make pregnancy safer. World Health Organization, Geneva, 2004. Available at <http://whqlibdoc.who.int/publications/2004/9241591838.pdf?ua=1> (accessed Sept 15, 2017)
5. World Health Organization. Regional Office for Europe. Conducting a maternal near-miss case review cycle at the hospital level” manual with practical tools. Available at <http://www.euro.who.int/en/health-topics/Life-stages/maternal-and-newborn-health/publications/2016/conducting-a-maternal-near-miss-case-review-cycle-at-hospital-level-2016> (accessed Sept 15, 2017)
6. Tunçalp O, Hindin MJ, Souza JP, Chou D, Say L. The prevalence of maternal near miss: a systematic review. *BJOG*. 2012 ;119:653-61
7. Liberati A, Altman DG, Tetzlaff J, Mulrow C, Gotzsche PC, Ioannidis JP et al. (2009) The PRISMA statement for reporting systematic reviews and meta-analyses of studies that evaluate health care interventions: explanation and elaboration. *PLoS Med* 6: e1000100.
8. The World Bank, Country and Lending Groups. (2014) Historical classification. Available: <https://datahelpdesk.worldbank.org/knowledgebase/articles/906519> (Accessed Sept 15, 2017).
9. World Health Organization 2011. Evaluating the quality of care for severe pregnancy complications: the WHO near-miss approach for maternal health. World Health Organization, Geneva, 2011
10. Institute of Medicine. Crossing the Quality Chasm. Washington, DC: National Academy Press, 2001. Available at <http://www.nap.edu/openbook.php?isbn=0309072808>. Accessed on Sept 15, 2017
11. Donabedian A. The quality of care: how can it be assessed? *JAMA* 1988; 260: 1743-1748.
12. Higgins JPT, Green S (editors). *Cochrane Handbook for Systematic Reviews of Interventions* Version 5.1.0 [updated March 2011]. The Cochrane Collaboration, 2011. Available from <http://handbook.cochrane.org>. (Accessed Sept 15, 2017)
13. Lumala A, Sekweyama P, Abaasa A, Lwanga H, Byaruhanga R. Assessment of quality of care among in-patients with postpartum haemorrhage and severe pre-eclampsia at st. Francis hospital

- 1 nsambya: a criteria-based audit. *BMC Pregnancy Childbirth*.2017 ;17:29. doi: 10.1186/s12884-016-  
2 1219-y.  
3  
4  
5 14. Mgaya AH, Kidanto HL, Nystrom L, Essén B. Improving Standards of Care in Obstructed Labour: A  
6 Criteria-Based Audit at a Referral Hospital in a Low-Resource Setting in Tanzania. *PLoS One*. 2016  
7 ;11:e0166619. doi: 10.1371/journal.pone.0166619.  
8  
9 15. Kayiga H, Ajeani J, Kiondo P, Kaye DK. Improving the quality of obstetric care for women with  
10 obstructed labour in the national referral hospital in Uganda: lessons learnt from criteria based audit.  
11 *BMC Pregnancy Childbirth*. 2016 ;16:152.  
12  
13 16. Mohd Azri MS, Edahayati AT, Kunasegaran K. Audit on management of eclampsia at Sultan Abdul  
14 Halim Hospital. *Med J Malaysia*. 2015 ;70:142-7.  
15  
16 17. Gebrehiwot Y, Tewolde BT. Improving maternity care in Ethiopia through facility based review of  
17 maternal deaths and near misses. *Int J Gynaecol Obstet*. 2014 ;127 Suppl 1:S29-34.  
18  
19 18. Baltag V, Filippi V, Bacci A. Putting theory into practice: the introduction of obstetric near-miss case  
20 reviews in the Republic of Moldova. *Int J Qual Health Care*. 2012 ;24:182-8  
21  
22 19. Kidanto HL, Wangwe P, Kilewo CD, Nystrom L, Lindmark G. Improved quality of management of  
23 eclampsia patients through criteria based audit at Muhimbili National Hospital, Dar es Salaam,  
24 Tanzania. *Bridging the quality gap. BMC Pregnancy Childbirth*. 2012 ;12:134.  
25  
26 20. Sukhanberdiyev K, Ayazbekov A, Issina A, Abuova G, Hodorocea S, Bacci A. Initial experience of  
27 Near Miss Case Review: improving the management of haemorrhage. *Entre Nous* 2011: 74; 18-19.  
28  
29 21. Hodorocea s. Piloting near miss case reviews in Kazakhstan: improving quality of maternal care.  
30 *Entre Nous* 2010: 70; 28-29.  
31  
32 22. van den Akker T, van Rhenen J, Mwangomba B, Lommerse K, Vinkhumbo S, van Roosmalen J.  
33 Reduction of severe acute maternal morbidity and maternal mortality in Thyolo District, Malawi: the  
34 impact of obstetric audit. *PLoS One*. 2011;6:e20776. doi: 10.1371/journal.pone.0020776. Epub 2011  
35 Jun 3.  
36  
37 23. Bailey PE, Binh HT, Bang HT. Promoting accountability in obstetric care: use of criteria-based audit  
38 in Viet Nam. *Glob Public Health*. 2010;5:62-74.  
39  
40 24. van den Akker T, Mwangomba B, Irlam J, van Roosmalen J. Using audits to reduce the incidence of  
41 uterine rupture in a Malawian district hospital. *Int J Gynaecol Obstet*. 2009;107:289-94. doi:  
42 10.1016/j.ijgo.2009.09.005. Epub 2009 Oct 28.  
43  
44 25. Hunyinbo KI, Fawole AO, Sotiloye OS, Otolorin EO. Evaluation of criteria-based clinical audit in  
45 improving quality of obstetric care in a developing country hospital. *Afr J Reprod Health*. 2008  
46 ;12:59-70  
47  
48 26. Kongnyuy EJ, Leigh B, van den Broek N. Effect of audit and feedback on the availability, utilisation  
49 and quality of emergency obstetric care in three districts in Malawi. *Women Birth*. 2008 ;21:149-55.  
50  
51 27. Kongnyuy EJ, Mlava G, van den Broek N. Criteria-based audit to improve a district referral system in  
52 Malawi: a pilot study. *BMC Health Serv Res*. 2008 ;8:190.  
53  
54 28. Weeks AD, Alia G, Ononge S, Otolorin EO, Mirembe FM. A criteria-based audit of the management  
55 of severe pre-eclampsia in Kampala, Uganda. *Int J Gynaecol Obstet*. 2005 ;91:292-7; discussion  
56 283-4.  
57  
58  
59  
60

- 1  
2  
3  
4  
5  
6  
7  
8  
9  
10  
11  
12  
13  
14  
15  
16  
17  
18  
19  
20  
21  
22  
23  
24  
25  
26  
27  
28  
29  
30  
31  
32  
33  
34  
35  
36  
37  
38  
39  
40  
41  
42  
43  
44  
45  
46  
47  
48  
49  
50  
51  
52  
53  
54  
55  
56  
57  
58  
59  
60
29. Wagaarachchi PT, Graham WJ, Penney GC, McCaw-Binns A, Yeboah Antwi K, Hall MH. Holding up a mirror: changing obstetric practice through criterion-based clinical audit in developing countries. *Int J Gynaecol Obstet.* 2001 ;74:119-30
  30. Ivers N, Jamtvedt G, Flottorp S, Young JM, Odgaard-Jensen J, French SD, O'Brien MA, Johansen M, Grimshaw J, Oxman AD. Audit and feedback: effects on professional practice and healthcare outcomes. *Cochrane Database Syst Rev.* 2012 ;(6):CD000259.
  31. Pantoja T, Opiyo N, Lewin S, Paulsen E, Ciapponi A, Wiysonge CS, Herrera CA, Rada G, Peñaloza B, Dudley L, Gagnon MP, Garcia Marti S, Oxman AD. Implementation strategies for health systems in low-income countries: an overview of systematic reviews. *Cochrane Database Syst Rev.* 2017 ;9:CD011086. doi: 10.1002/14651858.CD011086.pub2.
  32. Kongnyuy EJ, Uthman OA. Use of criterion-based clinical audit to improve the quality of obstetric care: A systematic review. *Acta Obstet Gynecol Scand.*2009;88:873-81
  33. Pirkle CM, Dumont A, Zunzunegui MV. Criterion-based clinical audit to assess quality of obstetrical care in low- and middle-income countries: a systematic review. *Int J Qual Health Care.* 2011 ;23:456-63.
  34. Wu J, Song B, Zheng R. Evaluating the effectiveness of maternal near-miss audit in China. *International Journal of Gynecology and Obstetrics 2015 Conference: 21st FIGO World Congress of Gynecology and Obstetrics.* Vancouver, BC Canada. Conference Start: 20151004. Conference End: 20151009. Conference Publication: (var.pagings). 131
  35. Lewis G. Emerging lessons from the FIGO LOGIC initiative on maternal death and near-miss reviews. *Int J Gynaecol Obstet.* 2014 ;127 Suppl 1:S17-20.
  36. Heitkamp, A.; Vollmer, L.; Van Den Akker, T.; Gebhardt, S.; Van Roosmalen, J.; Theron, G. Severe acute maternal morbidity (SAMM) in metro east, western cape, South Africa: "Every human being has the right to live, every child needs a mother, mothers should not die because of their pregnancy." How can we improve the quality of care in the existing health system? *International Journal of Gynecology and Obstetrics 2015. Conference: 21st FIGO World Congress of Gynecology and Obstetrics.* Vancouver, BC Canada. Conference Start: 20151004. Conference End: 20151009. Conference Publication: (var.pagings). 131
  37. Lazzarini M, Ciuch M, Covi B, Rusconi S, Bacci A. Facilitators and barriers to the effective implementation of the maternal near-miss case reviews in low and middle income countries: systematic review (submitted for publication)
  38. Bacci A, Lewis G, Baltag V, Betrán AP. The introduction of confidential enquiries into maternal deaths and near-miss case reviews in the WHO European Region. *Reprod Health Matters.* 2007 ;15:145-52.
  39. World Health Organization. Regional Office for Europe. Multi-Country review meeting on maternal mortality and morbidity audit "Beyond the Numbers", Report of a WHO meeting, Charvak, Uzbekistan 14–17 June 2010. Copenhagen, WHO Regional Office for Europe, 2010. Available at <http://www.euro.who.int/en/health-topics/Life-stages/maternal-and-newborn-health/publications/2010/multi-country-review-meeting-on-maternal-mortality-and-morbidity-audit-beyond-the-numbers,-report-of-a-who-meeting,-charvak,-uzbekistan-1417-june-2010> (accessed Sept 8, 2017).

- 1  
2 40. World Health Organization. Regional Office for Europe. The impact of implementation of 'Beyond the  
3 numbers' approach in improving maternal and perinatal health. 29-30 April 2014, Bishkek,  
4 Kyrgyzstan. Copenhagen, WHO Regional Office for Europe, 2014. Available at  
5 [http://www.euro.who.int/en/media-centre/events/events/2014/04/the-impact-of-implementation-of-](http://www.euro.who.int/en/media-centre/events/events/2014/04/the-impact-of-implementation-of-beyond-the-numbers-approach-in-improving-maternal-and-perinatal-health)  
6 [beyond-the-numbers-approach-in-improving-maternal-and-perinatal-health](http://www.euro.who.int/en/media-centre/events/events/2014/04/the-impact-of-implementation-of-beyond-the-numbers-approach-in-improving-maternal-and-perinatal-health) (accessed Sep 8, 2017).  
7  
8
- 9 41. WHO Regional Office for Europe Making Pregnancy Safer in Uzbekistan. Maternal mortality and  
10 morbidity audit Activities Report 2002-2008. Available at  
11 [http://www.euro.who.int/\\_data/assets/pdf\\_file/0004/98797/MPS\\_UZB.pdf](http://www.euro.who.int/_data/assets/pdf_file/0004/98797/MPS_UZB.pdf) (accessed Sept 8, 2017)  
12
- 13 42. National Institute for Clinical Excellence (NICE). Principles for best practice in clinical audit.  
14 Abingdon, Berks: Radcliffe Medical Press; 2002 ([http://www.uhbristol.nhs.uk/files/nhs-](http://www.uhbristol.nhs.uk/files/nhs-ubht/best_practice_clinical_audit.pdf)  
15 [ubht/best\\_practice\\_clinical\\_audit.pdf](http://www.uhbristol.nhs.uk/files/nhs-ubht/best_practice_clinical_audit.pdf) ( accessed Sept 22, 2017)  
16
- 17 43. World Health Organization Regional Office for Europe. Action plan for sexual and reproductive  
18 health: towards achieving the 2030 Agenda for Sustainable Development in Europe – leaving no one  
19 behind. Copenhagen: World Health Organization Regional Office for Europe; 2016. Available at  
20 [http://www.euro.who.int/\\_data/assets/pdf\\_file/0018/314532/66wd13e\\_SRHActionPlan\\_160524.pdf](http://www.euro.who.int/_data/assets/pdf_file/0018/314532/66wd13e_SRHActionPlan_160524.pdf) (  
21 accessed Sept 22, 2017)  
22
- 23 44. Knight M, Lewis G, Acosta CD, Kurinczuk JJ. Maternal near-miss case reviews: the UK approach.  
24 BJOG. 2014 ;121 Suppl 4:112-6.  
25
- 26 45. Knight M, Acosta C, Brocklehurst P, Cheshire A, Fitzpatrick K, Hinton L, Jokinen M, Kemp B,  
27 Kurinczuk JJ, Lewis G, Lindquist A, Locock L, Nair M, Patel N, Quigley M, Ridge D, Rivero-Arias O,  
28 Sellers S, Shah A; on behalf of the UKNeS coapplicant group. Beyond maternal death: improving the  
29 quality of maternal care through national studies of 'near-miss' maternal morbidity. Southampton  
30 (UK):NIHR Journals Library; 2016 Jun.  
31
- 32 46. MacDonald EJ, Geller SE, Lawton B. Establishment of a national severe maternal morbidity  
33 preventability review in New Zealand. Int J Gynaecol Obstet. 2016;135:120-3.  
34
- 35 47. Knight M; INOSS. The International Network of Obstetric Survey Systems (INOSS): benefits of multi-  
36 country studies of severe and uncommon maternal morbidities. Acta Obstet Gynecol Scand. 2014  
37 ;93:127-31.  
38
- 39 48. Donati S, Maraschini A, Buoncrisiano M, Bucciarelli M, Marani A. Grave morbosità materna da  
40 emorragia del post partum: aspetti metodologici del progetto coordinato dall'Italia Obstetrics  
41 Surveillance System. Rapporto Osservasalute 2014. Stato di salute e qualità dell'assistenza nelle  
42 regioni italiane. Milano: Prex, 2014. p. 260-1.  
43
- 44 49. Donati S, Maraschini A, Buoncrisiano M, Lega I, Bucciarelli M, Andreozzi S, Gruppo di lavoro ISS-  
45 Regioni. Attività della sorveglianza ostetrica: l'Istituto Superiore di Sanità-Regioni per la gestione  
46 della grave morbosità materna da emorragia del post partum. Rapporto Osservasalute 2015. Stato  
47 di salute e qualità dell'assistenza nelle regioni italiane. Milano: Prex, 2016. p. 264-6  
48
- 49 50. Doran, G. T. (1981). "There's a S.M.A.R.T. way to write management's goals and objectives".  
50 Management Review (AMA FORUM) 70 (11): 35–36  
51
- 52 51. Borchert M, Goufodji S, Alihonou E, Delvaux T, Saizonou J, Kanhonou L, Filippi V. Can hospital  
53 audit teams identify case management problems, analyse their causes, identify and implement  
54  
55  
56  
57  
58  
59  
60

- 1  
2 improvements? A cross-sectional process evaluation of obstetric near-miss case reviews in Benin.  
3 BMC Pregnancy Childbirth. 2012 ;12:109.  
4  
5 52. Bacci A, Hodoroega S, Khachatryan H, Babojonova S, Irse S, Jansone M, Dondiuc M, Matarazde  
6 G, Lazdane G, Lazzerini M. Assessment of the quality of the facility based individual near miss case  
7 reviews in the WHO European Region: findings from Armenia, Georgia, Latvia, Republic of Moldova,  
8 Uzbekistan (submitted for publication to BMJ Open, minor revision requested)  
9  
10 53. Aguiar Cde A, Tanaka AC. [Collective memories of women who have experienced maternal near  
11 miss: health needs and human rights]. Cad Saude Publica. 2016 ;32:e00161215.  
12  
13 54. Pãfs J, Musafili A, Binder-Finnema P, Klingberg-Allvin M, Rulisa S, Essén B. Beyond the numbers of  
14 maternal near-miss in Rwanda - a qualitative study on women's perspectives on access and  
15 experiences of care in early and late stage of pregnancy. BMC Pregnancy Childbirth. 2016 ;16:257.  
16  
17 55. Hinton L, Locock L, Knight M. Experiences of the quality of care of women with near-miss maternal  
18 morbidities in the UK. BJOG. 2014 ;121 Suppl 4:20-3  
19  
20 56. Aghlmand S, Akbari F, Lameei A, Mohammad K, Small R, Arab M. Developing evidence-based  
21 maternity care in Iran: a quality improvement study. BMC Pregnancy Childbirth. 2008 ;8:20.  
22  
23  
24  
25  
26  
27  
28  
29  
30  
31  
32  
33  
34  
35  
36  
37  
38  
39  
40  
41  
42  
43  
44  
45  
46  
47  
48  
49  
50  
51  
52  
53  
54  
55  
56  
57  
58  
59  
60

1  
2  
3  
4  
5  
6  
7  
8  
9  
10  
11  
12  
13  
14  
15  
16  
17  
18  
19  
20  
21  
22  
23  
24  
25  
26  
27  
28  
29  
30  
31  
32  
33  
34  
35  
36  
37  
38  
39  
40  
41  
42  
43  
44  
45  
46  
47  
48  
49  
50  
51  
52  
53  
54  
55  
56  
57  
58  
59  
60

## TABLES

### Box 1. Search strategy

**PubMed**                      **Date: Sept 15, 2017**                      **Total retrieved: 5578**

"near miss" OR (audit AND (obstetric\* OR matern\* OR pregnan\* OR woman OR women))

**Lilacs**                              **Date: Sept 15, 2017**                      **Total retrieved: 227**

(TW:near miss OR MH:near miss) OR ((TW:audit OR MH:audit OR TW:auditoria OR MH:auditoria OR auditoria) AND (gravid\$ OR pregnan\$ OR enceint\$ OR embarazad\$ OR obstetr\$ OR mulher\$ OR mujer\$ OR femme\$ OR woman OR women OR matern\$))

**Global Idex Medicus**                      **Date: Sept 15, 2017**                      **Total retrieved: 7806**

(TW:near miss OR MH:near miss) OR ((TW:audit OR MH:audit OR TW:auditoria OR MH:auditoria OR auditoria) AND (gravid\$ OR pregnan\$ OR enceint\$ OR embarazad\$ OR obstetr\$ OR mulher\$ OR mujer\$ OR femme\$ OR woman OR women OR matern\$))

**Web of Science**                      **Date: Sept 18, 2017**                      **Total retrieved: 4850**

TS= "near miss" OR (TS=audit AND TS=(gravid\* OR pregnan\* OR obstetr\* OR woman OR women OR matern\*))

**Cochrane Library**                      **Date: Sept 15, 2017**                      **Total retrieved: :411**

"near miss" OR (audit AND (gravid\* or pregnan\* or obstetr\* or woman or women or matern\*))

**EMBASE**                              **Date: Sept 15, 2017**                      **Total retrieved: 5927**

- 1 ("near miss" or audit).ab. (34259)
- 2 (obstetric\* or matern\* or pregnan\* or woman or women).ab. (1057153)
- 3 1 and 2 (4764)
- 4 ("near miss" or audit).ti. (13725)
- 5 (obstetric\* or matern\* or pregnan\* or woman or women).ti. (325314)
- 6 4 and 5 (724)
- 7 3 or 6 (4962)

**Table 1. Study settings, designs and sample sizes**

| Author                                                            | Design | Duration  | Country    | Setting | Number and type of hospitals §                                                           |
|-------------------------------------------------------------------|--------|-----------|------------|---------|------------------------------------------------------------------------------------------|
| Lumala 2017 <sup>13</sup>                                         | ITS    | 10 months | Uganda     | Urban   | 1 tertiary specialist hospital, catholic funded private non profit                       |
| Mgaya 2017 <sup>14</sup>                                          | NCBA   | 25 months | Tanzania   | Urban   | 1 tertiary specialist hospital                                                           |
| Kayiga 2016 <sup>15</sup>                                         | NCBA   | 7 months  | Uganda     | Urban   | 1 tertiary specialist hospital                                                           |
| Mohd Azri 2015 <sup>16</sup>                                      | NCBA   | 2 years   | Malaysia   | Urban   | 1 tertiary specialist hospital                                                           |
| Gebrehiwot 2014 <sup>17</sup>                                     | NCBA   | 18 months | Ethiopia   | Urban   | 10 public hospitals                                                                      |
| Baltag 2012 <sup>18</sup>                                         | NCBA   | 13 months | Moldova    | Mixed   | 3 mixed (referral-level facilities at municipal, national and district levels)           |
| Kidanto 2012 <sup>19</sup>                                        | NCBA   | 3 years   | Tanzania   | Urban   | 1 teaching hospital                                                                      |
| Sukhanberdiyev 2011 <sup>20</sup><br>Hodorogea 2010 <sup>21</sup> | NCBA   | 2 years   | Kazakhstan | Urban   | 6 mixed (national research centre, regional and city hospitals)                          |
| Van den Akker 2011 <sup>22</sup>                                  | ITS    | 2 years   | Malawi     | Rural   | 29 mixed (1 referral hospital and 28 government, private and mission smaller facilities) |
| Bailey 2010 <sup>23</sup>                                         | NCBA   | 2 years   | Vietnam    | Mixed   | 5 mixed (provincial, area and district)                                                  |
| Van den Akker 2009 <sup>24</sup>                                  | NCBA   | 1 year    | Malawi     | Rural   | 1 referral hospital + undefined numbers of health centers                                |
| Hun Yinbo 2008 <sup>25</sup>                                      | NCBA   | 13 months | Nigeria    | Urban   | 1 tertiary specialist hospital                                                           |
| Kongnyuy 2008 <sup>26</sup>                                       | NCBA   | 2 years   | Malawi     | Mixed   | 73 mixed (hospitals, health centers)                                                     |



|                                        |      |           |                      |       |                                                      |
|----------------------------------------|------|-----------|----------------------|-------|------------------------------------------------------|
| <b>Kongnyuy 2008</b> <sup>27</sup>     | NCBA | 6 months  | Malawi               | Rural | 1 one district hospital, 12 satellite health centers |
| <b>Weeks 2005</b> <sup>28</sup>        | NCBA | 20 months | Uganda               | Urban | 1 teaching hospital                                  |
| <b>Wagaarachchi 2001</b> <sup>29</sup> | NCBA | 26 months | Ghana and<br>Jamaica | Urban | 4 district hospitals                                 |

Abbreviations: NCBA= non controlled before and fater study, ITS= Intermittent time series

Table 2. Characteristics of the interventions

| Author                        | Characteristics of the audit                          | Who performed the audit                                                                                           | Who developed the recommendations                    | Type of cases audited                   | Selection criteria                                                                                                                 | N Case audited (before / after)                | Woman Interview |
|-------------------------------|-------------------------------------------------------|-------------------------------------------------------------------------------------------------------------------|------------------------------------------------------|-----------------------------------------|------------------------------------------------------------------------------------------------------------------------------------|------------------------------------------------|-----------------|
| Lumala 2017 <sup>13</sup>     | two phases, retrospective                             | medical doctor                                                                                                    | facility staff                                       | PPH and severe pre-eclampsia, eclampsia | All in-patient cases in the study period, not referred and not receiving hydralazine or magnesium sulphate from the referring unit | 238 (125 before, 133 after)                    | no              |
| Mgaya 2017 <sup>14</sup>      | two phases, retrospective                             | trained postnatal ward nurses, s (a consultant, a specialist and a midwife were also available for consultation ) | facility staff (AN, L, MO, MW, P)                    | obstructed labour                       | All cases of obstructed labour with a single foetus in cephalic presentation, and no other severe medical conditions or PROM       | 510 (260 before, 250 after)                    | Yes             |
| Kayiga 2016 <sup>15</sup>     | two phases, prospective                               | NR                                                                                                                | facility staff (MO, MW, M)                           | obstructed labour                       | all cases occurring in the study period                                                                                            | 360 (180 before, 180 after)                    | yes             |
| Mohd Azri 2015 <sup>16</sup>  | first phase retrospective, second regular prospective | NR                                                                                                                | facility staff (members of the obstetric department) | eclampsia                               | all cases occurring in the study period                                                                                            | 51 (42 before, 9 after)                        | no              |
| Gebrehiwot 2014 <sup>17</sup> | prospective                                           | facility staff (MO, MW and other hospital staff + focal person)                                                   | facility staff                                       | all NM + MD                             | all cases occurring in the study period                                                                                            | 2568                                           | no              |
| Baltag 2012 <sup>18</sup>     | prospective                                           | facility staff involved in case management (MO, MD +                                                              | facility staff involved in case management (MO, MD + | NM                                      | not pre-defined criteria, cases were chosen by director                                                                            | 30 approx ( 1 case per month in each hospital) | yes             |

|                                                                                 |                                                     |                                                                               |                           |                                                                                                                |                                                                                                 |                                             |     |
|---------------------------------------------------------------------------------|-----------------------------------------------------|-------------------------------------------------------------------------------|---------------------------|----------------------------------------------------------------------------------------------------------------|-------------------------------------------------------------------------------------------------|---------------------------------------------|-----|
|                                                                                 |                                                     | occasionally L, T, PHC)                                                       | occasionally L, T, PHC)   |                                                                                                                |                                                                                                 |                                             |     |
| <b>Kidanto 2012</b> <sup>19</sup>                                               | first phase retrospective, second prospective       | 1 senior doctor                                                               | facility staff            | eclampsia and pre-eclampsia                                                                                    | all cases occurring in the study period                                                         | 477 (389 before, 88 after)                  | no  |
| <b>Sukhanberdiyev 2011</b> <sup>20</sup><br><b>Hodorogea 2010</b> <sup>21</sup> | prospective                                         | facility staff                                                                | facility staff            | PPH and severe pre-eclampsia                                                                                   | NR                                                                                              | not more than 10 in each hospital each year | yes |
| <b>Van den Akker 2011</b> <sup>22</sup>                                         | prospective every 2 to 3 weeks;                     | facility staff, occasionally external obs gyn                                 | facility staff            | infection, PPH, uterine rupture, preeclampsia, others) + MD                                                    | all cases occurring in the study period                                                         | 45 (24 deaths; 21 SOC)                      | no  |
| <b>Bailey 2010</b> <sup>23</sup>                                                | first phase retrospective, than regular prospective | facility staff (MO, N, M)                                                     | facility staff (MO, N, M) | severe preeclampsia, postpartum infection, prolonged/obstructed labour, PPH, organisation of emergency service | all cases occurring in the study period                                                         | 558 (312 before, 246 after)                 | no  |
| <b>Van den Akker 2009</b> <sup>24</sup>                                         | prospective every 2- 3 weeks for 3 months           | facility staff (M,MA, MO, MW,N); 2 external obstetricians in the second phase | facility staff (MO, N, M) | uterine rupture                                                                                                | cases that appeared to be of particular educational value to the PI or any other hospital staff | 35                                          | no  |

|                                        |                                               |                                                                          |                                               |                                                                                                                                      |                                         |                              |    |
|----------------------------------------|-----------------------------------------------|--------------------------------------------------------------------------|-----------------------------------------------|--------------------------------------------------------------------------------------------------------------------------------------|-----------------------------------------|------------------------------|----|
| <b>Hunyinbo 2008</b> <sup>25</sup>     | two phases, prospective                       | study investigator/s                                                     | facility staff (M,MA, MO, N,P, L)             | PPH, uterine rupture, eclampsia, obstructed labour, sepsis                                                                           | all cases occurring in the study period | 130 (65 before, 65 after)    | no |
| <b>Kongnyuy 2008</b> <sup>26</sup>     | two phases, prospective                       | facility staff (AN,M,MO,MW, L, T )                                       | facility staff (quality improvement team)     | PPH, obstructed labour, sepsis, preeclampsia/ eclampsia, neonatal care, CS , women-friendly care+ MD                                 | NR                                      | NR                           | no |
| <b>Kongnyuy 2008</b> <sup>27</sup>     | two phases, retrospective                     | district team (N, MW, CO,AN,T)                                           | hospital staff (quality improvement team)     | pre-eclampsia/ eclampsia, PPH, prolonged/ obstructed labour, retained placenta, sepsis, complications of abortion, ectopic pregnancy | all cases occurring in the study period | 122 (60 before, 62 after)    | no |
| <b>Weeks 2005</b> <sup>28</sup>        | first phase retrospective, second prospective | facility staff (including low grade staff)                               | facility staff                                | severe pre-eclampsia                                                                                                                 | all cases occurring in the study period | 86 (43 before, 43 after)     | no |
| <b>Wagaarachchi 2001</b> <sup>29</sup> | first phase retrospective, second prospective | non-medical assistants (10% of cases validated by independent re-review) | facility staff (M,MO, M + all relevant staff) | PPH, eclampsia, infection, obstructed labor, uterine rupture                                                                         | all cases occurring in the study period | 889 ( 551 before, 338 after) | no |

Abbreviations: AN= anesthetist of anesthetic technician, CO=clinical officer, CS= caesarian section, L= Laboratory, M= manager, MA=medical assistant, MD= maternal deaths, MO=medical officer, MW=midwife, N=nurse, ND= neonatal deaths, NM=Near miss, NR= not reported,P=Pharmacy, PHC= primary health care staff, PPH= post-partum hemorrhage, PROM= premature rupture of membranes, SOC= all severe obstetric cases, SEL= selected obstetric cases, T= technician

**Table 3. Effectiveness of the NMCR cycle on morbidity and on process outcomes**

| Author                                                                          | Morbidity and other health outcomes                                                                                                                                                                                                                     | Standards of care                                                                                                                                          | Other process outcomes                                                                                                                 |
|---------------------------------------------------------------------------------|---------------------------------------------------------------------------------------------------------------------------------------------------------------------------------------------------------------------------------------------------------|------------------------------------------------------------------------------------------------------------------------------------------------------------|----------------------------------------------------------------------------------------------------------------------------------------|
| <b>Lumala 2017</b> <sup>13</sup>                                                | –                                                                                                                                                                                                                                                       | Eclampsia and pre-eclampsia: 7/10 standards<br>PPH: 3/4 standards                                                                                          | –                                                                                                                                      |
| <b>Mgaya 2017</b> <sup>14</sup>                                                 | SAMM (incidence: 9.0% vs. 8.8% (p = 0.98).<br>Uterine rupture (incidence): 1/260 vs 0/250 (p=0.49)<br>Perinatal severe morbidities and deaths and fresh stillbirths: 16% vs. 8.8% (p = 0.01)                                                            | Obstructed labour: 6/10 standards on diagnosis, 6/10 standards on case management                                                                          | Significant reduction of time needed from decision to perform a caesarian section to delivery (mean difference:- 30 minutes, p< 0.001) |
| <b>Kayiga 2016</b> <sup>15</sup>                                                | Uterine rupture (Incidence): 8/180 vs 2/180 (p=0.04)<br>Maternal sepsis (Incidence): 10/180 vs 2/180 (p=0.02)<br>Post-spinal headache (incidence): 0/180 vs 13/180 (p<0.001)<br>Baby admitted to intensive care: 27/180 vs 31/180 (p=0.61)              | Obstructed labour: 2/6 standards, 4/13 measures of standards                                                                                               | –                                                                                                                                      |
| <b>Mohd Azri 2015</b> <sup>16</sup>                                             | Eclampsia (incidence): 42/44818 vs 9/10784 (p> 0.05)<br>Recurrent eclamptic fits: 8/42 vs 1/9 (p> 0.05)<br>Newborn babies with Apgar score (< 7) at 5 minutes after birth: 8/42 vs 3/9 (p> 0.05)<br>Birth weight less than 2500g 22/42 vs 5/9 (p> 0.05) | Improved adherence to 2/2 audit criteria that where substandard in the first phase (all other 10 criteria were already according to standards at baseline) | –                                                                                                                                      |
| <b>Gebrehiwot 2014</b> <sup>17</sup>                                            | –                                                                                                                                                                                                                                                       | –                                                                                                                                                          | Reducing waiting time                                                                                                                  |
| <b>Baltag 2012</b> <sup>18</sup>                                                | –                                                                                                                                                                                                                                                       | –                                                                                                                                                          | Improved medical records<br>Improved attitude towards patients                                                                         |
| <b>Kidanto 2012</b> <sup>19</sup>                                               | –                                                                                                                                                                                                                                                       | Eclampsia and pre-eclampsia: 10/16 standards                                                                                                               | Improved records keeping                                                                                                               |
| <b>Sukhanberdiyev 2011</b> <sup>20</sup><br><b>Hodorogea 2010</b> <sup>21</sup> | Improved patient satisfaction (NR)                                                                                                                                                                                                                      | –                                                                                                                                                          | Improved case management and monitoring (eg weighing of blood losses and documenting systematically)                                   |

|                                         |                                                                                                                                                                                                                                                                                               |                                                                                                                     |                                                                                                                         |
|-----------------------------------------|-----------------------------------------------------------------------------------------------------------------------------------------------------------------------------------------------------------------------------------------------------------------------------------------------|---------------------------------------------------------------------------------------------------------------------|-------------------------------------------------------------------------------------------------------------------------|
| <b>Van den Akker 2011</b> <sup>22</sup> | SAMM (Incidence): 33/2295 vs 49/5291 (p=0.08)<br>Major PPH (incidence): 17/2295 vs 15/5291 (p=0.006)<br>Uterine rupture (Incidence): 14/2295 vs 4/5291 (p=0.03)<br>Severe pre-eclampsia (Incidence): 6/2295 vs 16/5291 (p=0.3)<br>Maternal infections (Incidence): 10/2295 vs 14/5291 (p=0.6) | -                                                                                                                   | Improved patients monitoring                                                                                            |
| <b>Bailey 2010</b> <sup>23</sup>        | -                                                                                                                                                                                                                                                                                             | Eclampsia: 12/18 standards<br>Infections: 11/23 standards<br>Obstructed labour: 1/1 standards<br>PPH: 3/3 standards | -                                                                                                                       |
| <b>Van den Akker 2009</b> <sup>24</sup> | Uterine rupture (incidence): 16/833 vs 19/3099 (OR 0.32; 95% CI, 0.16–0.63)                                                                                                                                                                                                                   | -                                                                                                                   | -                                                                                                                       |
| <b>Hun Yinbo 2008</b> <sup>25</sup>     | -                                                                                                                                                                                                                                                                                             | SAMM: 8/31 standards                                                                                                | -                                                                                                                       |
| <b>Kongnyuy 2008</b> <sup>26</sup>      | -                                                                                                                                                                                                                                                                                             | -                                                                                                                   | Significant increase in the met need for EmOC (15.2% for 2005, 17.0% for 2006 and 18.8% for 2007, p for trend < 0.001). |
| <b>Kongnyuy 2008</b> <sup>27</sup>      | -                                                                                                                                                                                                                                                                                             | SAMM: 4 /7 standards<br>(other criteria were already according to standards at baseline)                            | -                                                                                                                       |
| <b>Weeks 2005</b> <sup>28</sup>         | Eclampsia (incidence): 5/43 vs 5/43 (p> 0.05)                                                                                                                                                                                                                                                 | Severe pre-eclampsia: 5/9 standards                                                                                 | -                                                                                                                       |
| <b>Wagaarachchi 2001</b> <sup>29</sup>  | -                                                                                                                                                                                                                                                                                             | SA: 8/31 standards                                                                                                  | -                                                                                                                       |

Abbreviations: CFR= case fatality rate; MM= maternal mortality; MMO= maternal morbidity; NM= neonatal mortality; NR= not further specified; PM: perinatal mortality; PPH= post partum hemorrhage; SAMM: severe acute maternal morbidity

**Table 4. Effectiveness of the NMCR cycle on the structure**

| Author                        | Physical structure                             | Staffing                                                                            | Equipment and supplies                            | Training, monitoring and supervision                                  | Local policies and organization of services                                                                                                                                                                                                                                                                                                                             |
|-------------------------------|------------------------------------------------|-------------------------------------------------------------------------------------|---------------------------------------------------|-----------------------------------------------------------------------|-------------------------------------------------------------------------------------------------------------------------------------------------------------------------------------------------------------------------------------------------------------------------------------------------------------------------------------------------------------------------|
| Lumala 2017 <sup>13</sup>     |                                                |                                                                                     |                                                   |                                                                       |                                                                                                                                                                                                                                                                                                                                                                         |
| Mgaya 2017 <sup>14</sup>      |                                                |                                                                                     |                                                   | training on partograph, improved supervision                          | Improved dissemination and use of guidelines, Improved team work and internal communication among hospital staff                                                                                                                                                                                                                                                        |
| Kayiga 2016 <sup>15</sup>     |                                                |                                                                                     |                                                   |                                                                       | Re-engineering hospital Red Alert System: list of responsible person to be contacted during Red Alert activation was put up in all obstetrics facilities; Information on the importance of activating the Red Alert in eclampsia cases was disseminated to all staff; hospital telephone operator was informed regarding existence of this system and how it functions. |
| Mohd Azri 2015 <sup>16</sup>  |                                                | Better specification of roles and responsibilities                                  |                                                   | Training, improved awareness of standards, improved patient education | Reorganization of "red alert" system                                                                                                                                                                                                                                                                                                                                    |
| Gebrehiwot 2014 <sup>17</sup> | Some hospitals expanded accommodate more cases | Staff organization: duties assignment; staff rotation every 12 h to avoid tiredness | Contribution of resources (stationery, transport) | Provision of training and feedback to health centers                  | Improved dissemination of protocols, increased use of partograph, Improved documentation and reporting improved coordination with health centers,                                                                                                                                                                                                                       |
| Baltag 2012 <sup>18</sup>     |                                                |                                                                                     | Improved equipment and supplies                   |                                                                       | Improved dissemination of protocols, organization of care and management                                                                                                                                                                                                                                                                                                |
| Kidanto 2012 <sup>19</sup>    |                                                | Improved doctor availability 24/24h                                                 | Additional equipment purchased                    | Training                                                              | Improved dissemination of protocols, monitoring forms, reorganization of daily routine and setting of priorities, doctors assigned to manage cases of                                                                                                                                                                                                                   |

1  
2  
3  
4  
5  
6  
7  
8  
9  
10  
11  
12  
13  
14  
15  
16  
17  
18  
19  
20  
21  
22  
23  
24  
25  
26  
27  
28  
29  
30  
31  
32  
33  
34  
35  
36  
37  
38  
39  
40  
41  
42  
43  
44  
45  
46  
47

|                                                                                 |                                                       |                                                                                                                                                                          |                                                                                                         |                                                                                        |                                                                                                                                                                                                                                                                                                             |
|---------------------------------------------------------------------------------|-------------------------------------------------------|--------------------------------------------------------------------------------------------------------------------------------------------------------------------------|---------------------------------------------------------------------------------------------------------|----------------------------------------------------------------------------------------|-------------------------------------------------------------------------------------------------------------------------------------------------------------------------------------------------------------------------------------------------------------------------------------------------------------|
|                                                                                 |                                                       |                                                                                                                                                                          |                                                                                                         |                                                                                        | eclampsia                                                                                                                                                                                                                                                                                                   |
| <b>Sukhanberdiyev 2011</b> <sup>20</sup><br><b>Hodorogea 2010</b> <sup>21</sup> |                                                       | Rational use of staff by internal redistribution, optimization of human resources by reducing the working hours, increased role of mid-level staff (midwives and nurses) | Mobile devices for timely alert and warning, drugs and blood components, prostaglandins and uterotonics | Training on protocols and standards, periodic drills, improving time management skills | Developing, diffusing and use new evidenced-based protocols, developing emergency care algorithms and conditions for transportation from remote areas, identifying the responsible person for the readiness of the emergency kit, monitoring forms, weighing of blood losses and documenting systematically |
| <b>Van den Akker 2011</b> <sup>22</sup>                                         |                                                       |                                                                                                                                                                          |                                                                                                         | Training, regular on job coaching, improved supervision, monitoring of ambulance use   | Improved dissemination of protocols and use of partograph, doctors to visits critically ill patients at least once a day                                                                                                                                                                                    |
| <b>Bailey 2010</b> <sup>23</sup>                                                |                                                       |                                                                                                                                                                          | Purchase of equipment (lab, car for oncall, telephone for emergency), wall flow charts                  | Training, supervision                                                                  | Leadership on implementing changes, standardization of treatment with protocols and checklists, team work record keeping                                                                                                                                                                                    |
| <b>Van den Akker 2009</b> <sup>24</sup>                                         |                                                       |                                                                                                                                                                          | More ambulances                                                                                         | Training, supervision, follow up visits in health centers                              | Improved dissemination of protocols, transport organization, organize session for theater staff with the intention to reduce delay in surgical care                                                                                                                                                         |
| <b>Hunyinbo 2008</b> <sup>25</sup>                                              |                                                       |                                                                                                                                                                          | Pharmacy supply including oxytocins, MgSO4, blood and coagulation tests                                 |                                                                                        | Improved dissemination of protocols, clinical meetings, observational and fluid balance charts                                                                                                                                                                                                              |
| <b>Kongnyuy 2008</b> <sup>26</sup>                                              | The number of comprehensive and basic EmOC facilities |                                                                                                                                                                          |                                                                                                         |                                                                                        |                                                                                                                                                                                                                                                                                                             |



|                                        |                |                                                                                                                                 |                                                            |          |                                                                                                                                                                                                                                                                  |
|----------------------------------------|----------------|---------------------------------------------------------------------------------------------------------------------------------|------------------------------------------------------------|----------|------------------------------------------------------------------------------------------------------------------------------------------------------------------------------------------------------------------------------------------------------------------|
|                                        | did not change |                                                                                                                                 |                                                            |          |                                                                                                                                                                                                                                                                  |
| <b>Kongnyuy 2008</b> <sup>27</sup>     |                | Autonomy in decision making in MW-N                                                                                             | Better equipment and set up of service                     | Training | Reorganization of emergency care service, including use of ambulances,                                                                                                                                                                                           |
| <b>Weeks 2005</b> <sup>28</sup>        |                | Staff in the labour room reorganised giving each member a specific role in the management of emergencies;<br>two extra midwives | Equipment (urine dipstick, BP machines)                    |          | Triage established, leadership (direct of labour appointed), protocol and chart, commitment to improve medical files, departmental meetings, fundraising (a fundraising committee was established to raise funds for the drugs and equipment in recommendations) |
| <b>Wagaarachchi 2001</b> <sup>29</sup> |                |                                                                                                                                 | Record storage, blood cultures, structured patient records |          | Improved dissemination of protocols, reviewing supervisory responsibilities, organization of regular clinical meetings                                                                                                                                           |

Abbreviations: BP= Blood pressure; EmOC= Emergency Obstetric Care; N= Nurses; M=Midwives

## LEGENDS

### FIGURES

Figure 1. Study Flow Diagram

Figure 2. Pooled effect of the NMCR on maternal mortality

Figure 3. Pooled effect of the NMCR on perinatal or neonatal mortality

### SUPPLEMENTARY TABLES

Table S1. Type of outcomes evaluated in the studies

Table S2. Risk of bias

Table S3. World bank classification of country income

### SUPPLEMENTARY FIGURES

Figure S1. Sensitivity analysis: Pooled effect of the NMCR on maternal mortality in studies with at least 300 cases and 30 events

Figure S2. Sensitivity analysis: Pooled effect of the NMCR on perinatal mortality in studies with at least 300 cases and 30 events

Figure S3. Subgroup analysis: Pooled effect of the NMCR audit on maternal mortality by country income

Figure S4. Subgroup analysis: Pooled effect of the NMCR on perinatal mortality by country income

Figure S5. Funnel plot: effect of the NMCR on maternal mortality

Figure S6. Funnel plot: effect of the NMCR on perinatal mortality

For peer review only

1  
2  
3  
4  
5  
6  
7  
8  
9  
10  
11  
12  
13  
14  
15  
16  
17  
18  
19  
20  
21  
22  
23  
24  
25  
26  
27  
28  
29  
30  
31  
32  
33  
34  
35  
36  
37  
38  
39  
40  
41  
42  
43  
44  
45  
46  
47

1  
2  
3  
4  
5  
6  
7  
8  
9  
10  
11  
12  
13  
14  
15  
16  
17  
18  
19  
20  
21  
22  
23  
24  
25  
26  
27  
28  
29  
30  
31  
32  
33  
34  
35  
36  
37  
38  
39  
40  
41  
42  
43  
44  
45  
46  
47  
48  
49  
50  
51  
52  
53  
54  
55  
56  
57  
58  
59  
60



Figure 1. Study Flow Diagram



Figure 2. Pooled effect of the NMCR on maternal mortality

For peer review only

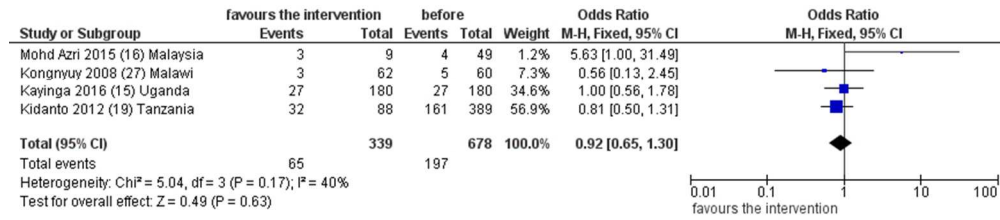

Figure 3. Pooled effect of the NMCR on perinatal or neonatal mortality

Figure S1. Sensitivity analysis : Pooled effect of the NMCR on maternal mortality in studies with at least 300 cases and 30 events

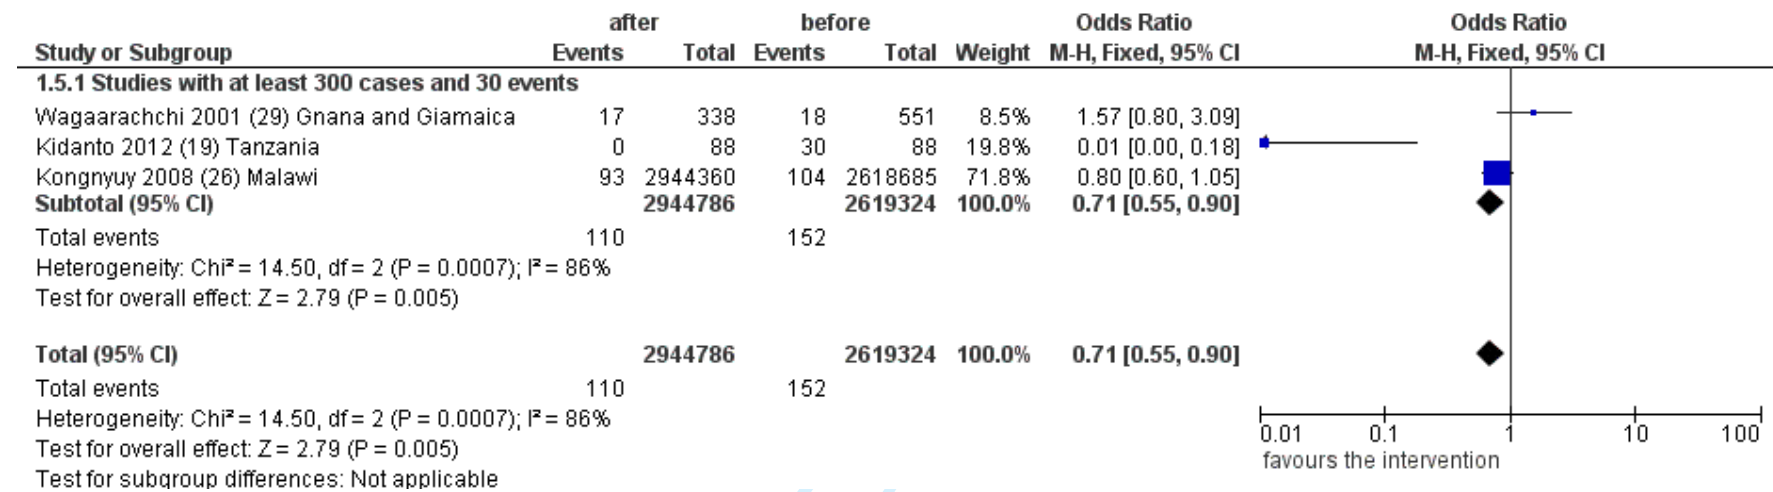

Figure S2. Sensitivity analysis : Pooled effect of the NMCR on perinatal mortality in studies with at least 300 cases and 30 events

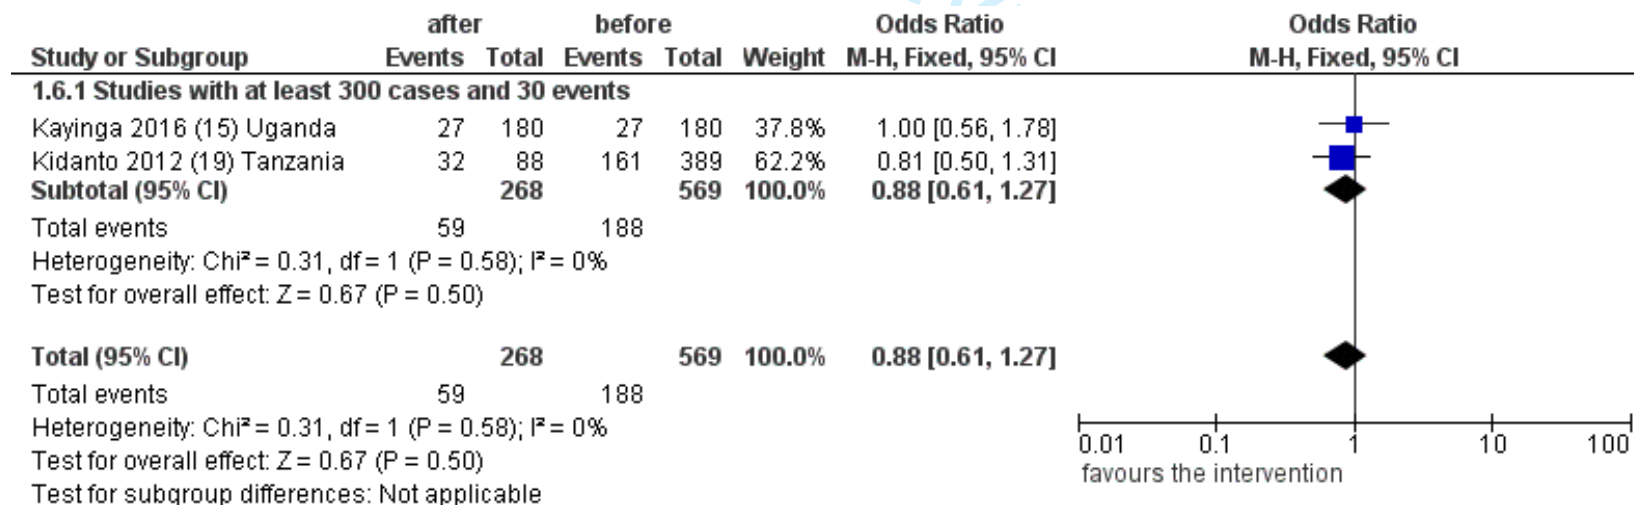

Figure S3. Subgroup analysis : Pooled effect of the NMCR audit on maternal mortality by country income

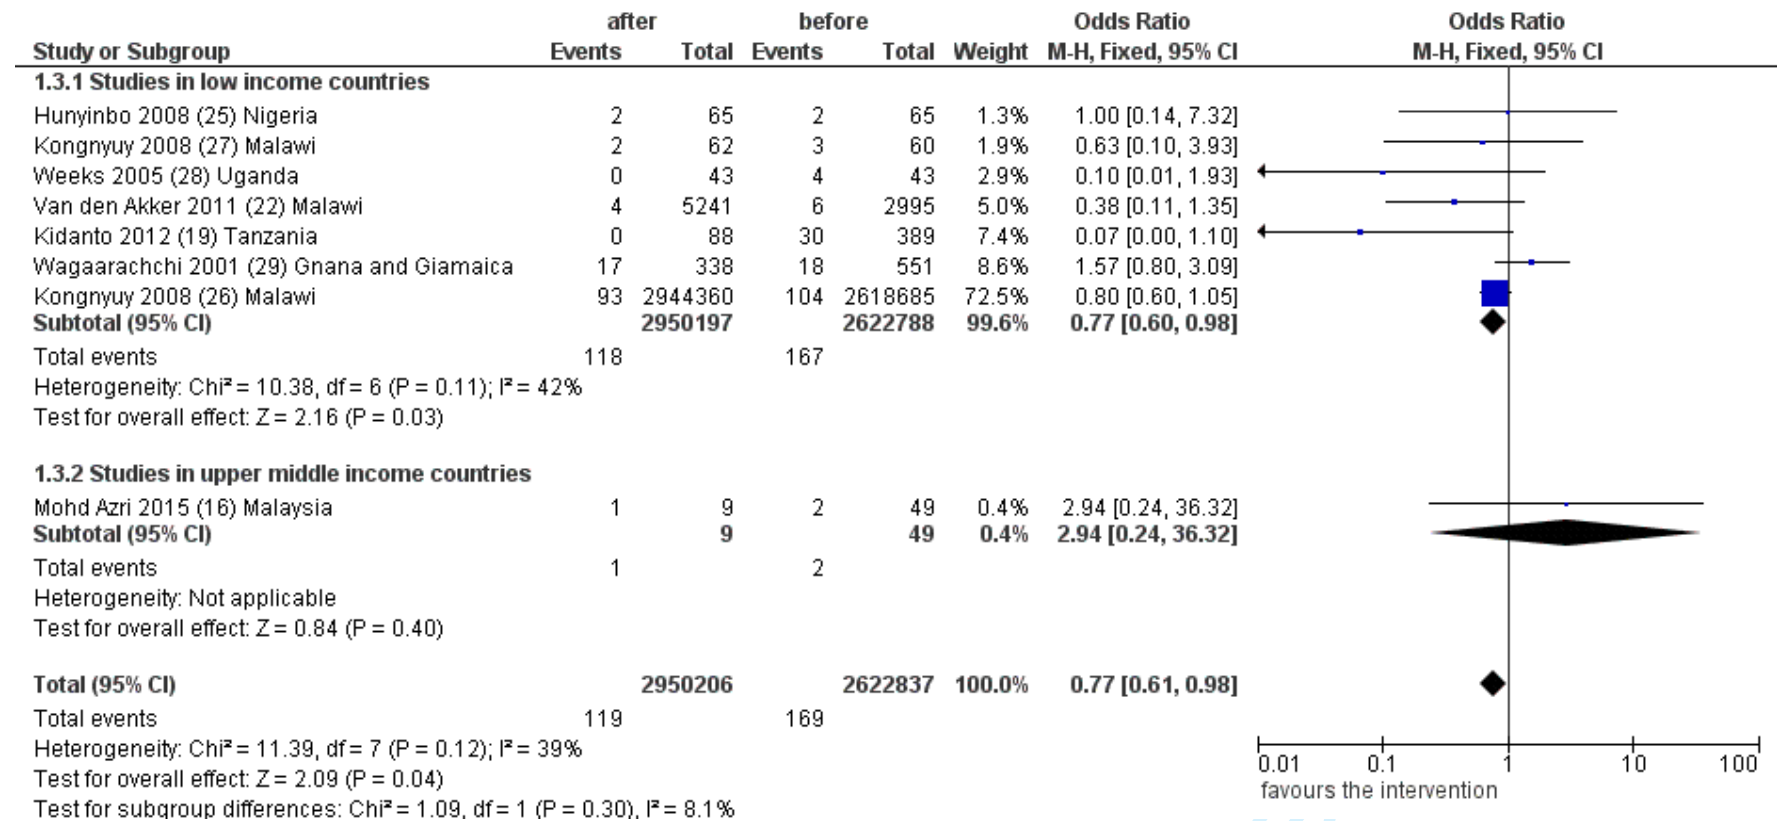



Figure S4. Subgroup analysis : Pooled effect of the NMCR on perinatal mortality by country income

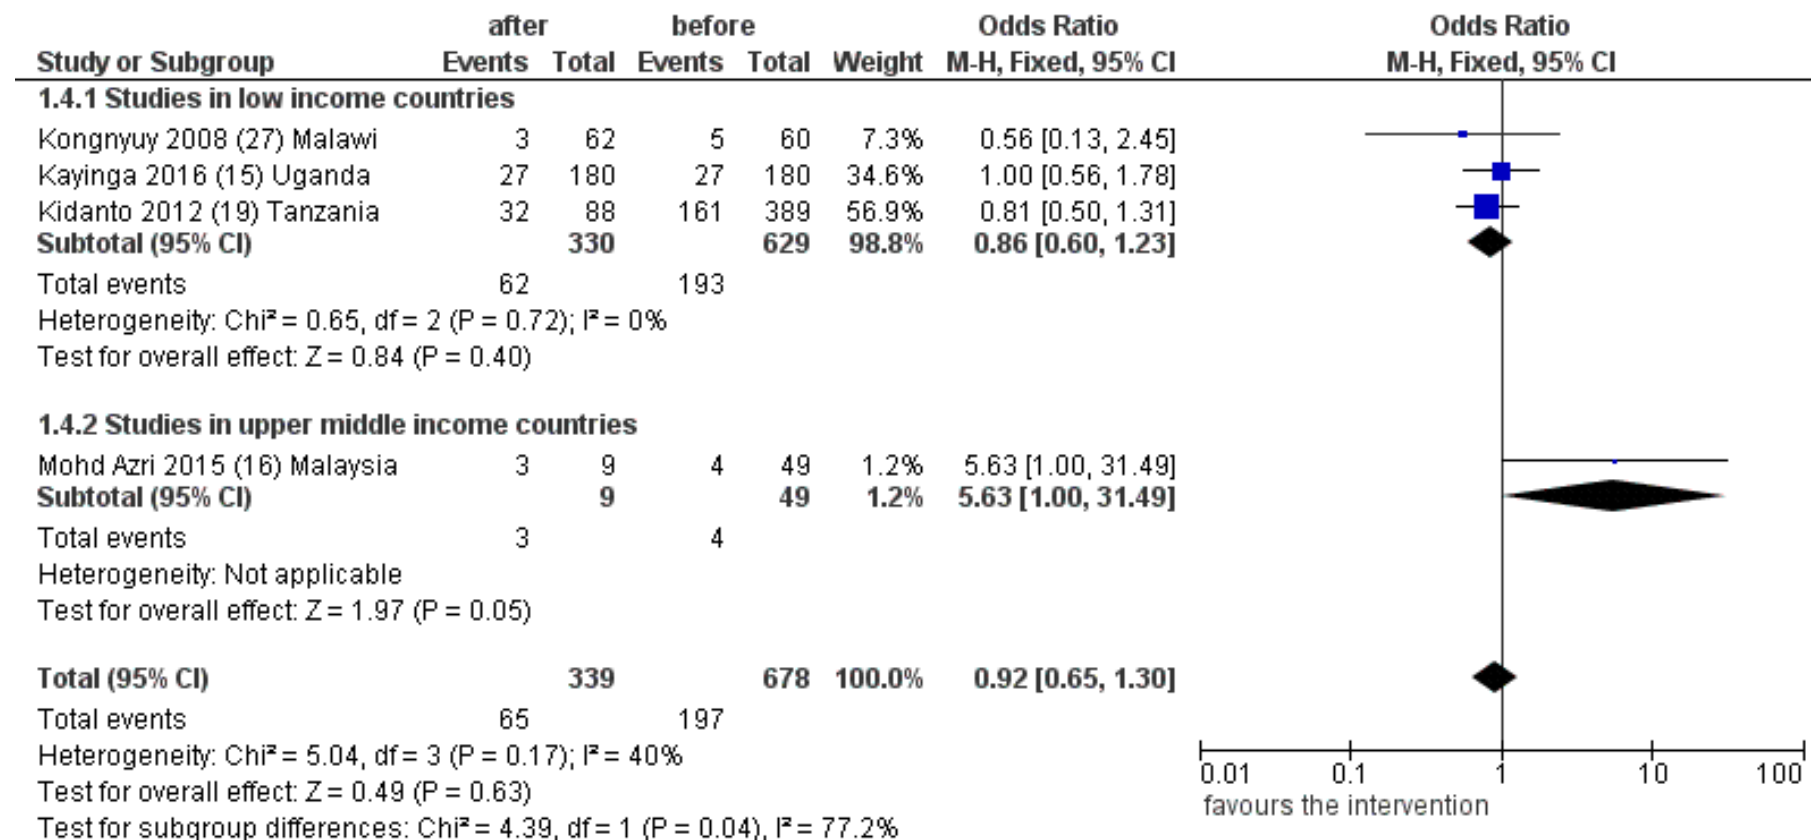

0.01 0.1 1 10 100  
favours the intervention

Figure S5. Funnel plot: effect of the NMCR on maternal mortality



Figure S6. Funnel plot: effect of the NMCR on perinatal mortality



Table S1. Type of outcomes evaluated in the studies

| Author                                                            | Patient centrality<br>and acceptability | Accessibility<br>Timely care | Efficiency<br>and equity | Safety | Effectiveness |
|-------------------------------------------------------------------|-----------------------------------------|------------------------------|--------------------------|--------|---------------|
| Lumala 2017 <sup>13</sup>                                         | —                                       | yes                          | —                        | —      | yes           |
| Mgaya 2017 <sup>14</sup>                                          | —                                       | yes                          | —                        | —      | yes           |
| Kayiga 2016 <sup>15</sup>                                         | —                                       | —                            | —                        | —      | yes           |
| Mohd Azri 2015 <sup>16</sup>                                      | —                                       | —                            | —                        | —      | yes           |
| Gebrehiwot 2014 <sup>17</sup>                                     | —                                       | yes                          | —                        | —      | yes           |
| Baltag 2012 <sup>18</sup>                                         | yes                                     | —                            | —                        | —      | yes           |
| Kidanto 2012 <sup>19</sup>                                        | —                                       | yes                          | —                        | —      | yes           |
| Sukhanberdiyev 2011 <sup>20</sup><br>Hodorogea 2010 <sup>21</sup> | yes                                     | yes                          | —                        | —      | yes           |
| Van den Akker 2011 <sup>22</sup>                                  | —                                       | yes                          | —                        | —      | yes           |
| Bailey 2010 <sup>23</sup>                                         | —                                       | yes                          | —                        | —      | yes           |
| Van den Akker 2009 <sup>24</sup>                                  | —                                       | yes                          | —                        | —      | yes           |
| Hunyinbo 2008 <sup>25</sup>                                       | —                                       | yes                          | —                        | —      | yes           |
| Kongnyuy 2008 <sup>26</sup>                                       | —                                       | yes                          | —                        | —      | yes           |

|                                        |   |     |   |   |     |
|----------------------------------------|---|-----|---|---|-----|
| <b>Kongnyuy 2008</b> <sup>27</sup>     | — | yes | — | — | yes |
| <b>Weeks 2005</b> <sup>28</sup>        | — | yes | — | — | yes |
| <b>Wagaarachchi 2001</b> <sup>29</sup> | — | yes | — | — | yes |

For peer review only

Table S2. Risk of bias

| Author                                                            | Study design | Risk of bias criteria for RCTs, CCTs, CBAs, UCBA |                               |                 |                                |                            | Additive risk of bias criteria for ITS            |                                                       |                                                         |
|-------------------------------------------------------------------|--------------|--------------------------------------------------|-------------------------------|-----------------|--------------------------------|----------------------------|---------------------------------------------------|-------------------------------------------------------|---------------------------------------------------------|
|                                                                   |              | <i>Random sequence generation</i>                | <i>Allocation concealment</i> | <i>Blinding</i> | <i>Incomplete outcome data</i> | <i>Selective reporting</i> | <i>Intervention independent of other changes?</i> | <i>Shape of the intervention effect prespecified?</i> | <i>Intervention unlikely to affect data collection?</i> |
| Lumala 2017 <sup>13</sup>                                         | ITS          | high                                             | high                          | high            | low                            | unclear                    | high                                              | low                                                   | high                                                    |
| Mgaya 2017 <sup>14</sup>                                          | NCBA         | high                                             | high                          | high            | low                            | unclear                    | -                                                 | -                                                     | -                                                       |
| Kayiga 2016 <sup>15</sup>                                         | NCBA         | high                                             | high                          | high            | low                            | unclear                    | -                                                 | -                                                     | -                                                       |
| Mohd Azri 2015 <sup>16</sup>                                      | NCBA         | high                                             | high                          | high            | low                            | unclear                    | -                                                 | -                                                     | -                                                       |
| Gebrehiwot 2014 <sup>17</sup>                                     | NCBA         | high                                             | high                          | high            | low                            | unclear                    | -                                                 | -                                                     | -                                                       |
| Baltag 2012 <sup>18</sup>                                         | NCBA         | high                                             | high                          | high            | low                            | unclear                    | -                                                 | -                                                     | -                                                       |
| Kidanto 2012 <sup>19</sup>                                        | NCBA         | high                                             | high                          | high            | low                            | unclear                    | -                                                 | -                                                     | -                                                       |
| Sukhanberdiyev 2011 <sup>20</sup><br>Hodorogea 2010 <sup>21</sup> | NCBA         | high                                             | high                          | high            | low                            | unclear                    | -                                                 | -                                                     | -                                                       |
| Van den Akker 2011 <sup>22</sup>                                  | ITS          | high                                             | high                          | high            | low                            | unclear                    | high                                              | low                                                   | high                                                    |
| Bailey 2010 <sup>23</sup>                                         | NCBA         | high                                             | high                          | high            | low                            | unclear                    | -                                                 | -                                                     | -                                                       |
| Van den Akker 2009 <sup>24</sup>                                  | NCBA         | high                                             | high                          | high            | low                            | unclear                    | -                                                 | -                                                     | -                                                       |

1  
2  
3  
4  
5  
6  
7  
8  
9  
10  
11  
12  
13  
14  
15  
16  
17  
18  
19  
20  
21  
22  
23  
24  
25  
26  
27  
28  
29  
30  
31  
32  
33  
34  
35  
36  
37  
38  
39  
40  
41  
42  
43  
44  
45  
46

|                                        |      |      |      |      |     |         |   |   |   |
|----------------------------------------|------|------|------|------|-----|---------|---|---|---|
| <b>Hunyinbo 2008</b> <sup>25</sup>     | NCBA | high | high | high | low | unclear | - | - | - |
| <b>Kongnyuy 2008</b> <sup>26</sup>     | NCBA | high | high | high | low | unclear | - | - | - |
| <b>Kongnyuy 2008</b> <sup>27</sup>     | NCBA | high | high | high | low | unclear | - | - | - |
| <b>Weeks 2005</b> <sup>28</sup>        | NCBA | high | high | high | low | unclear | - | - | - |
| <b>Wagaarachchi 2001</b> <sup>29</sup> | NCBA | high | high | high | low | unclear | - | - | - |

For peer review only

Table S3. World bank classification of country income

| Author                            | Country           | WB classification * |
|-----------------------------------|-------------------|---------------------|
| Lumala 2017 <sup>13</sup>         | Uganda            | L                   |
| Mgaya 2017 <sup>14</sup>          | Tanzania          | L                   |
| Kayiga 2016 <sup>15</sup>         | Uganda            | L                   |
| Mohd Azri 2015 <sup>16</sup>      | Malaysia          | UM                  |
| Gebrehiwot 2014 <sup>17</sup>     | Ethiopia          | L                   |
| Baltag 2012 <sup>18</sup>         | Moldova           | LM                  |
| Kidanto 2012 <sup>19</sup>        | Tanzania          | L                   |
| Sukhanberdiyev 2011 <sup>20</sup> | Kazakhstan        | UM                  |
| Hodorogea 2010 <sup>21</sup>      |                   |                     |
| Van den Akker 2011 <sup>22</sup>  | Malawi            | L                   |
| Bailey 2010 <sup>23</sup>         | Vietnam           | L §§                |
| Van den Akker 2009 <sup>24</sup>  | Malawi            | L                   |
| Hunyinbo 2008 <sup>25</sup>       | Nigeria           | L §§                |
| Kongnyuy 2008 <sup>26</sup>       | Malawi            | L                   |
| Kongnyuy 2008 <sup>27</sup>       | Malawi            | L                   |
| Weeks 2005 <sup>28</sup>          | Uganda            | L                   |
| Wagaarachchi 2001 <sup>29</sup>   | Ghana and Jamaica | L §§                |

§ L=Low income; LM=Lower middle income; UM=Upper middle income

§§ Ghana, Jamaica, Nigeria and Vietnam were classified as low income countries during the time of the study, while they were upgraded to lower middle income in 2010, 2007 2008, and 2009 respectively.

1  
2  
3  
4  
5  
6  
7  
8  
9  
10  
11  
12  
13  
14  
15  
16  
17  
18  
19  
20  
21  
22  
23  
24  
25  
26  
27  
28  
29  
30  
31  
32  
33  
34  
35  
36  
37  
38  
39  
40  
41  
42  
43  
44  
45  
46  
47  
48  
49  
50  
51  
52  
53  
54  
55  
56  
57  
58  
59  
60

For peer review only



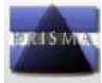

# PRISMA 2009 Checklist

| Section/topic                      | #  | Checklist item                                                                                                                                                                                                                                                                                              | Reported on page # |
|------------------------------------|----|-------------------------------------------------------------------------------------------------------------------------------------------------------------------------------------------------------------------------------------------------------------------------------------------------------------|--------------------|
| <b>TITLE</b>                       |    |                                                                                                                                                                                                                                                                                                             |                    |
| Title                              | 1  | Identify the report as a systematic review, meta-analysis, or both.                                                                                                                                                                                                                                         | 1                  |
| <b>ABSTRACT</b>                    |    |                                                                                                                                                                                                                                                                                                             |                    |
| Structured summary                 | 2  | Provide a structured summary including, as applicable: background; objectives; data sources; study eligibility criteria, participants, and interventions; study appraisal and synthesis methods; results; limitations; conclusions and implications of key findings; systematic review registration number. | 2                  |
| <b>INTRODUCTION</b>                |    |                                                                                                                                                                                                                                                                                                             |                    |
| Rationale                          | 3  | Describe the rationale for the review in the context of what is already known.                                                                                                                                                                                                                              | 4                  |
| Objectives                         | 4  | Provide an explicit statement of questions being addressed with reference to participants, interventions, comparisons, outcomes, and study design (PICOS).                                                                                                                                                  | 5                  |
| <b>METHODS</b>                     |    |                                                                                                                                                                                                                                                                                                             |                    |
| Protocol and registration          | 5  | Indicate if a review protocol exists, if and where it can be accessed (e.g., Web address), and, if available, provide registration information including registration number.                                                                                                                               | 5                  |
| Eligibility criteria               | 6  | Specify study characteristics (e.g., PICOS, length of follow-up) and report characteristics (e.g., years considered, language, publication status) used as criteria for eligibility, giving rationale.                                                                                                      | 5                  |
| Information sources                | 7  | Describe all information sources (e.g., databases with dates of coverage, contact with study authors to identify additional studies) in the search and date last searched.                                                                                                                                  | 5                  |
| Search                             | 8  | Present full electronic search strategy for at least one database, including any limits used, such that it could be repeated.                                                                                                                                                                               | 42 (box 1)         |
| Study selection                    | 9  | State the process for selecting studies (i.e., screening, eligibility, included in systematic review, and, if applicable, included in the meta-analysis).                                                                                                                                                   | 6                  |
| Data collection process            | 10 | Describe method of data extraction from reports (e.g., piloted forms, independently, in duplicate) and any processes for obtaining and confirming data from investigators.                                                                                                                                  | 6                  |
| Data items                         | 11 | List and define all variables for which data were sought (e.g., PICOS, funding sources) and any assumptions and simplifications made.                                                                                                                                                                       | 6                  |
| Risk of bias in individual studies | 12 | Describe methods used for assessing risk of bias of individual studies (including specification of whether this was done at the study or outcome level), and how this information is to be used in any data synthesis.                                                                                      | 6                  |
| Summary measures                   | 13 | State the principal summary measures (e.g., risk ratio, difference in means).                                                                                                                                                                                                                               | 6                  |
| Synthesis of results               | 14 | Describe the methods of handling data and combining results of studies, if done, including measures of consistency (e.g., $I^2$ ) for each meta-analysis.                                                                                                                                                   | 6                  |



# PRISMA 2009 Checklist

Page 1 of 2

| Section/topic                 | #  | Checklist item                                                                                                                                                                                           | Reported on page #      |
|-------------------------------|----|----------------------------------------------------------------------------------------------------------------------------------------------------------------------------------------------------------|-------------------------|
| Risk of bias across studies   | 15 | Specify any assessment of risk of bias that may affect the cumulative evidence (e.g., publication bias, selective reporting within studies).                                                             | 6                       |
| Additional analyses           | 16 | Describe methods of additional analyses (e.g., sensitivity or subgroup analyses, meta-regression), if done, indicating which were pre-specified.                                                         | 6                       |
| <b>RESULTS</b>                |    |                                                                                                                                                                                                          |                         |
| Study selection               | 17 | Give numbers of studies screened, assessed for eligibility, and included in the review, with reasons for exclusions at each stage, ideally with a flow diagram.                                          | 7<br>Figure 1           |
| Study characteristics         | 18 | For each study, present characteristics for which data were extracted (e.g., study size, PICOS, follow-up period) and provide the citations.                                                             | Table 1-2               |
| Risk of bias within studies   | 19 | Present data on risk of bias of each study and, if available, any outcome level assessment (see item 12).                                                                                                | Table S1                |
| Results of individual studies | 20 | For all outcomes considered (benefits or harms), present, for each study: (a) simple summary data for each intervention group (b) effect estimates and confidence intervals, ideally with a forest plot. | Table 3-4<br>Figure 1-2 |
| Synthesis of results          | 21 | Present results of each meta-analysis done, including confidence intervals and measures of consistency.                                                                                                  | 8<br>Figure 1-2 e S1-S4 |
| Risk of bias across studies   | 22 | Present results of any assessment of risk of bias across studies (see Item 15).                                                                                                                          | 9<br>Table S2           |
| Additional analysis           | 23 | Give results of additional analyses, if done (e.g., sensitivity or subgroup analyses, meta-regression [see Item 16]).                                                                                    | 9<br>Figure S1-S6       |
| <b>DISCUSSION</b>             |    |                                                                                                                                                                                                          |                         |
| Summary of evidence           | 24 | Summarize the main findings including the strength of evidence for each main outcome; consider their relevance to key groups (e.g., healthcare providers, users, and policy makers).                     | 10                      |
| Limitations                   | 25 | Discuss limitations at study and outcome level (e.g., risk of bias), and at review-level (e.g., incomplete retrieval of identified research, reporting bias).                                            | 10-11                   |
| Conclusions                   | 26 | Provide a general interpretation of the results in the context of other evidence, and implications for future research.                                                                                  | 10-13                   |

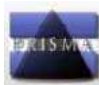

# PRISMA 2009 Checklist

|                |    |                                                                                                                                            |    |
|----------------|----|--------------------------------------------------------------------------------------------------------------------------------------------|----|
| <b>FUNDING</b> |    |                                                                                                                                            |    |
| Funding        | 27 | Describe sources of funding for the systematic review and other support (e.g., supply of data); role of funders for the systematic review. | 14 |

From: Moher D, Liberati A, Tetzlaff J, Altman DG, The PRISMA Group (2009). Preferred Reporting Items for Systematic Reviews and Meta-Analyses: The PRISMA Statement. PLoS Med 6(7): e1000097. doi:10.1371/journal.pmed1000097

For more information, visit: [www.prisma-statement.org](http://www.prisma-statement.org).

Page 2 of 2

For peer review only
