# Supplementary material for: Effectiveness of the facility-based maternal near-miss case reviews in improving maternal and newborn quality of care in low-income and middle-income countries: a systematic review
Source: PubMed Central journal article supplement — BMJ Open. 2018 Apr 19;8(4):e019787. doi: 10.1136/bmjopen-2017-019787 (PMC5914892; doi:10.1136/bmjopen-2017-019787), 2018-04-19
Supplement: bmjopen-2017-019787supp001.pdf [file bmjopen-2017-019787supp001.pdf]

**Table S1. Type of outcomes evaluated in the studies**

| <b>Author</b>                                                     | <b>Patient centrality<br/>and acceptability</b> | <b>Accessibility<br/>Timely care</b> | <b>Efficiency<br/>and equity</b> | <b>Safety</b> | <b>Effectiveness</b> |
|-------------------------------------------------------------------|-------------------------------------------------|--------------------------------------|----------------------------------|---------------|----------------------|
| Lumala 2017 <sup>13</sup>                                         | —                                               | yes                                  | —                                | —             | yes                  |
| Mgaya 2017 <sup>14</sup>                                          | —                                               | yes                                  | —                                | —             | yes                  |
| Kayiga 2016 <sup>15</sup>                                         | —                                               | —                                    | —                                | —             | yes                  |
| Mohd Azri 2015 <sup>16</sup>                                      | —                                               | —                                    | —                                | —             | yes                  |
| Gebrehiwot 2014 <sup>17</sup>                                     | —                                               | yes                                  | —                                | —             | yes                  |
| Baltag 2012 <sup>18</sup>                                         | yes                                             | —                                    | —                                | —             | yes                  |
| Kidanto 2012 <sup>19</sup>                                        | —                                               | yes                                  | —                                | —             | yes                  |
| Sukhanberdiyev 2011 <sup>20</sup><br>Hodorogea 2010 <sup>21</sup> | yes                                             | yes                                  | —                                | —             | yes                  |
| Van den Akker 2011 <sup>22</sup>                                  | —                                               | yes                                  | —                                | —             | yes                  |
| Bailey 2010 <sup>23</sup>                                         | —                                               | yes                                  | —                                | —             | yes                  |
| Van den Akker 2009 <sup>24</sup>                                  | —                                               | yes                                  | —                                | —             | yes                  |
| Hunyinbo 2008 <sup>25</sup>                                       | —                                               | yes                                  | —                                | —             | yes                  |
| Kongnyuy 2008 <sup>26</sup>                                       | —                                               | yes                                  | —                                | —             | yes                  |

|                                        |   |     |   |   |     |
|----------------------------------------|---|-----|---|---|-----|
| <b>Kongnyuy 2008</b> <sup>27</sup>     | — | yes | — | — | yes |
| <b>Weeks 2005</b> <sup>28</sup>        | — | yes | — | — | yes |
| <b>Wagaarachchi 2001</b> <sup>29</sup> | — | yes | — | — | yes |

Table S2. Risk of bias

| Author                                                            | Study design | Risk of bias criteria for RCTs, CCTs, CBAs, UCBA |                               |                 |                                |                            | Additive risk of bias criteria for ITS            |                                                       |                                                         |
|-------------------------------------------------------------------|--------------|--------------------------------------------------|-------------------------------|-----------------|--------------------------------|----------------------------|---------------------------------------------------|-------------------------------------------------------|---------------------------------------------------------|
|                                                                   |              | <i>Random sequence generation</i>                | <i>Allocation concealment</i> | <i>Blinding</i> | <i>Incomplete outcome data</i> | <i>Selective reporting</i> | <i>Intervention independent of other changes?</i> | <i>Shape of the intervention effect prespecified?</i> | <i>Intervention unlikely to affect data collection?</i> |
| Lumala 2017 <sup>13</sup>                                         | ITS          | high                                             | high                          | high            | low                            | unclear                    | high                                              | low                                                   | high                                                    |
| Mgaya 2017 <sup>14</sup>                                          | NCBA         | high                                             | high                          | high            | low                            | unclear                    | -                                                 | -                                                     | -                                                       |
| Kayiga 2016 <sup>15</sup>                                         | NCBA         | high                                             | high                          | high            | low                            | unclear                    | -                                                 | -                                                     | -                                                       |
| Mohd Azri 2015 <sup>16</sup>                                      | NCBA         | high                                             | high                          | high            | low                            | unclear                    | -                                                 | -                                                     | -                                                       |
| Gebrehiwot 2014 <sup>17</sup>                                     | NCBA         | high                                             | high                          | high            | low                            | unclear                    | -                                                 | -                                                     | -                                                       |
| Baltag 2012 <sup>18</sup>                                         | NCBA         | high                                             | high                          | high            | low                            | unclear                    | -                                                 | -                                                     | -                                                       |
| Kidanto 2012 <sup>19</sup>                                        | NCBA         | high                                             | high                          | high            | low                            | unclear                    | -                                                 | -                                                     | -                                                       |
| Sukhanberdiyev 2011 <sup>20</sup><br>Hodorogea 2010 <sup>21</sup> | NCBA         | high                                             | high                          | high            | low                            | unclear                    | -                                                 | -                                                     | -                                                       |
| Van den Akker 2011 <sup>22</sup>                                  | ITS          | high                                             | high                          | high            | low                            | unclear                    | high                                              | low                                                   | high                                                    |
| Bailey 2010 <sup>23</sup>                                         | NCBA         | high                                             | high                          | high            | low                            | unclear                    | -                                                 | -                                                     | -                                                       |
| Van den Akker 2009 <sup>24</sup>                                  | NCBA         | high                                             | high                          | high            | low                            | unclear                    | -                                                 | -                                                     | -                                                       |

|                                        |      |      |      |      |     |         |   |   |   |
|----------------------------------------|------|------|------|------|-----|---------|---|---|---|
| <b>Hunyinbo 2008</b> <sup>25</sup>     | NCBA | high | high | high | low | unclear | - | - | - |
| <b>Kongnyuy 2008</b> <sup>26</sup>     | NCBA | high | high | high | low | unclear | - | - | - |
| <b>Kongnyuy 2008</b> <sup>27</sup>     | NCBA | high | high | high | low | unclear | - | - | - |
| <b>Weeks 2005</b> <sup>28</sup>        | NCBA | high | high | high | low | unclear | - | - | - |
| <b>Wagaarachchi 2001</b> <sup>29</sup> | NCBA | high | high | high | low | unclear | - | - | - |

**Table S3. World bank classification of country income**

| <b>Author</b>                                                                   | <b>Country</b>    | <b>WB classification *</b> |
|---------------------------------------------------------------------------------|-------------------|----------------------------|
| <b>Lumala 2017</b> <sup>13</sup>                                                | Uganda            | L                          |
| <b>Mgaya 2017</b> <sup>14</sup>                                                 | Tanzania          | L                          |
| <b>Kayiga 2016</b> <sup>15</sup>                                                | Uganda            | L                          |
| <b>Mohd Azri 2015</b> <sup>16</sup>                                             | Malaysia          | UM                         |
| <b>Gebrehiwot 2014</b> <sup>17</sup>                                            | Ethiopia          | L                          |
| <b>Baltag 2012</b> <sup>18</sup>                                                | Moldova           | LM                         |
| <b>Kidanto 2012</b> <sup>19</sup>                                               | Tanzania          | L                          |
| <b>Sukhanberdiyev 2011</b> <sup>20</sup><br><b>Hodorogea 2010</b> <sup>21</sup> | Kazakhstan        | UM                         |
| <b>Van den Akker 2011</b> <sup>22</sup>                                         | Malawi            | L                          |
| <b>Bailey 2010</b> <sup>23</sup>                                                | Vietnam           | L §§                       |
| <b>Van den Akker 2009</b> <sup>24</sup>                                         | Malawi            | L                          |
| <b>Hunyinbo 2008</b> <sup>25</sup>                                              | Nigeria           | L §§                       |
| <b>Kongnyuy 2008</b> <sup>26</sup>                                              | Malawi            | L                          |
| <b>Kongnyuy 2008</b> <sup>27</sup>                                              | Malawi            | L                          |
| <b>Weeks 2005</b> <sup>28</sup>                                                 | Uganda            | L                          |
| <b>Wagaarachchi 2001</b> <sup>29</sup>                                          | Ghana and Jamaica | L §§                       |

§ L=Low income; LM=Lower middle income; UM=Upper middle income

§§ Ghana, Jamaica, Nigeria and Vietnam were classified as low income countries during the time of the study, while they were upgraded to lower middle income in 2010, 2007 2008, and 2009 respectively.
