# Supplementary material for: Effectiveness of the facility-based maternal near-miss case reviews in improving maternal and newborn quality of care in low-income and middle-income countries: a systematic review
Source: PubMed Central journal article supplement — BMJ Open. 2018 Apr 19;8(4):e019787. doi: 10.1136/bmjopen-2017-019787 (PMC5914892; doi:10.1136/bmjopen-2017-019787), 2018-04-19

Figure S1. Sensitivity analysis : Pooled effect of the NMCR on maternal mortality in studies with at least 300 cases and 30 events

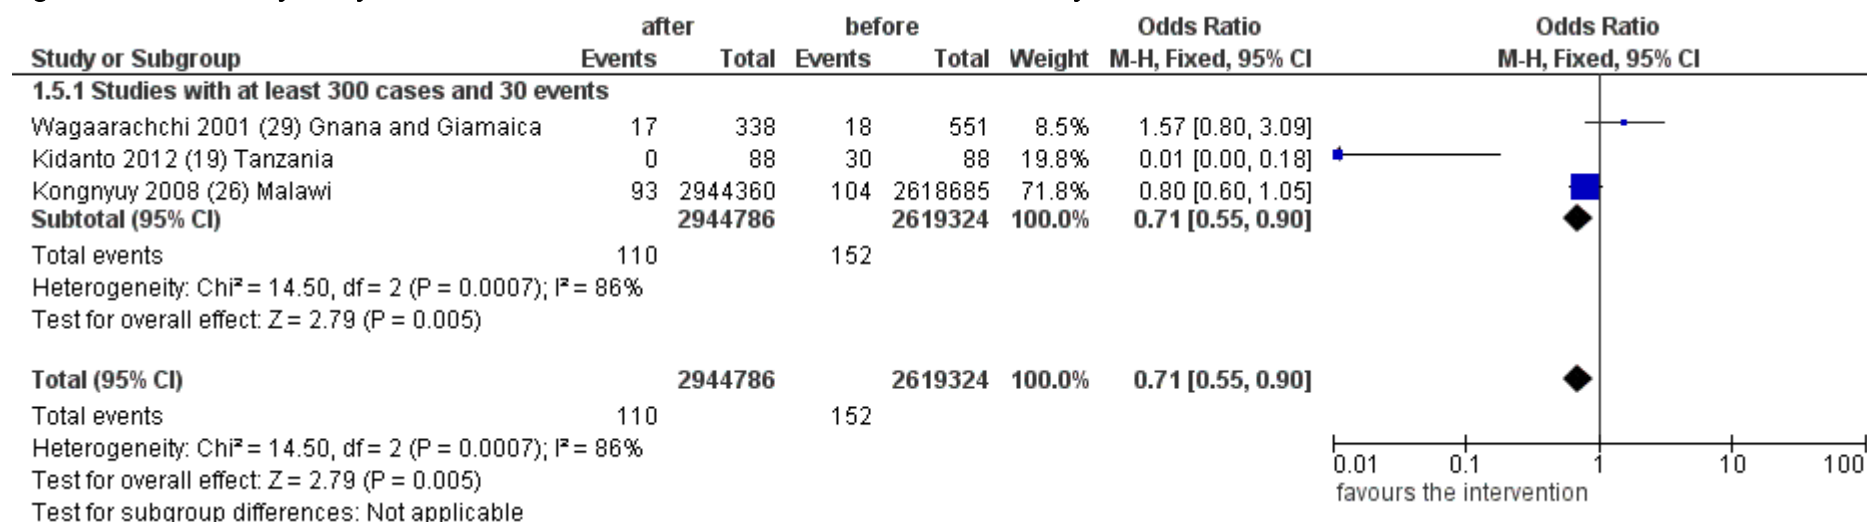

Figure S2. Sensitivity analysis : Pooled effect of the NMCR on perinatal mortality in studies with at least 300 cases and 30 events

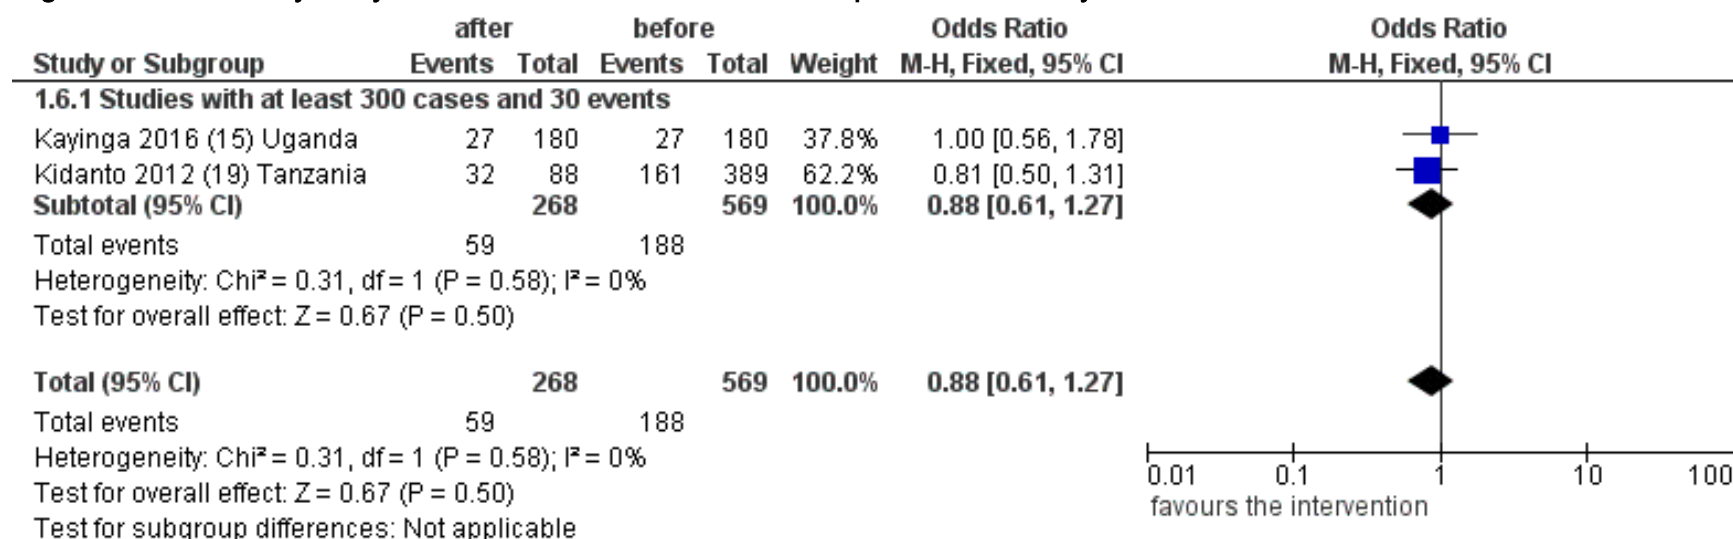

Figure S3. Subgroup analysis : Pooled effect of the NMCR audit on maternal mortality by country income

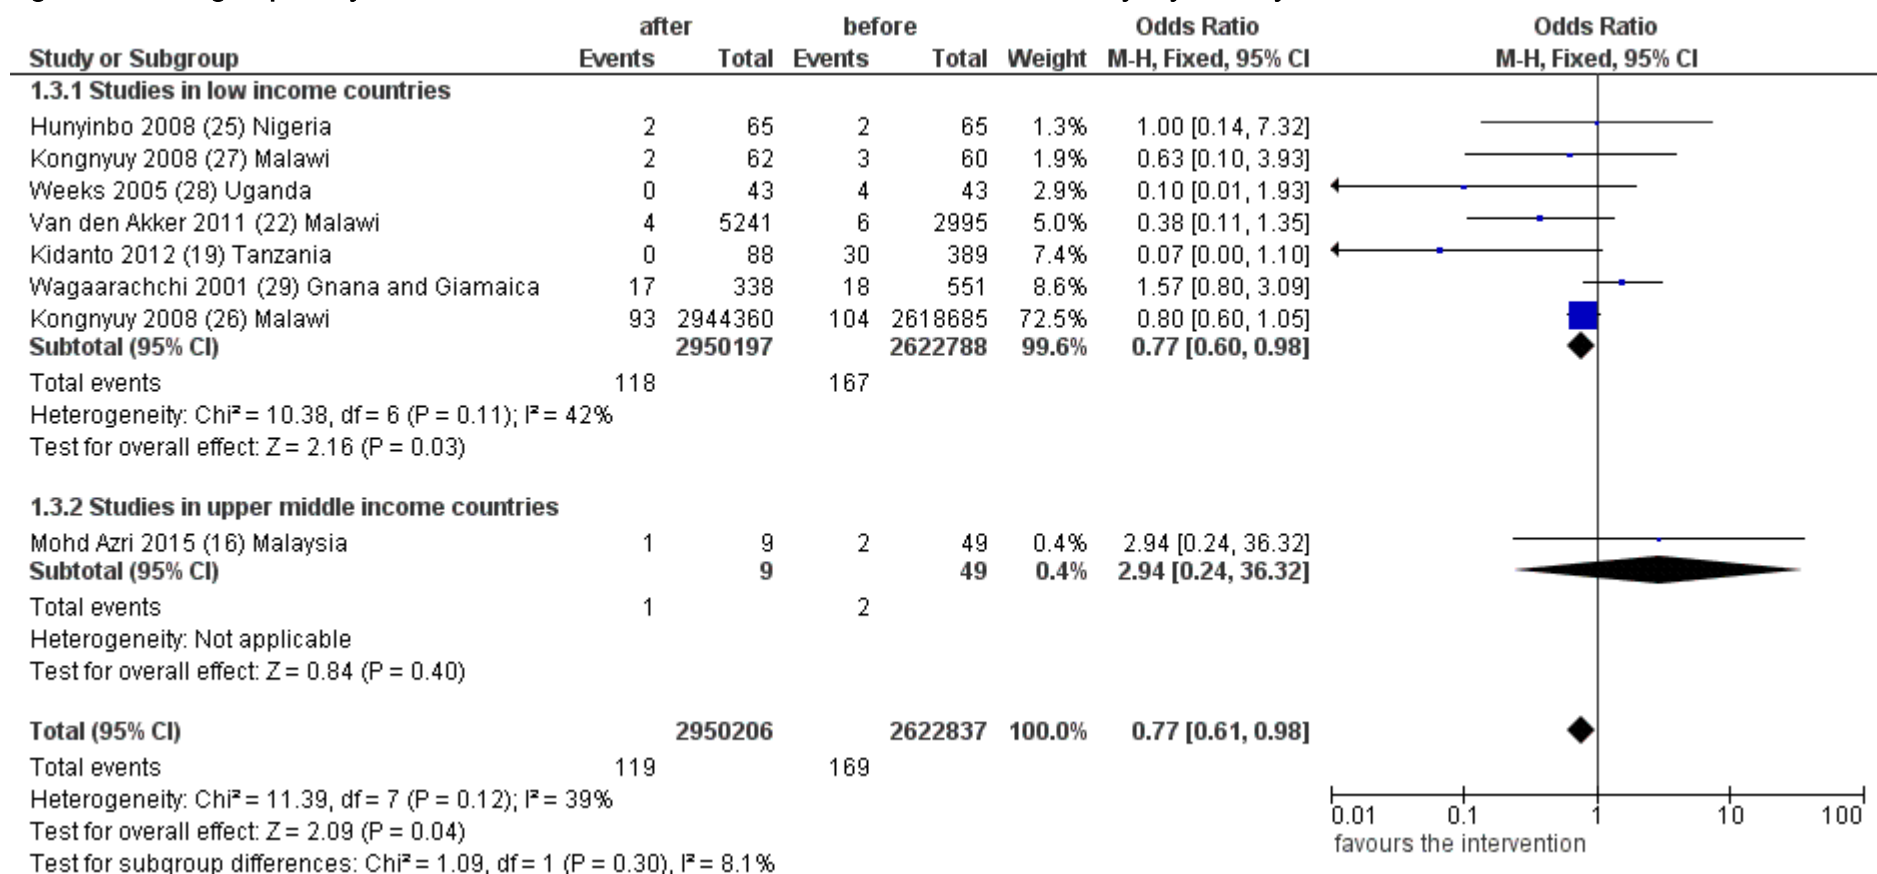

Figure S4. Subgroup analysis : Pooled effect of the NMCR on perinatal mortality by country income

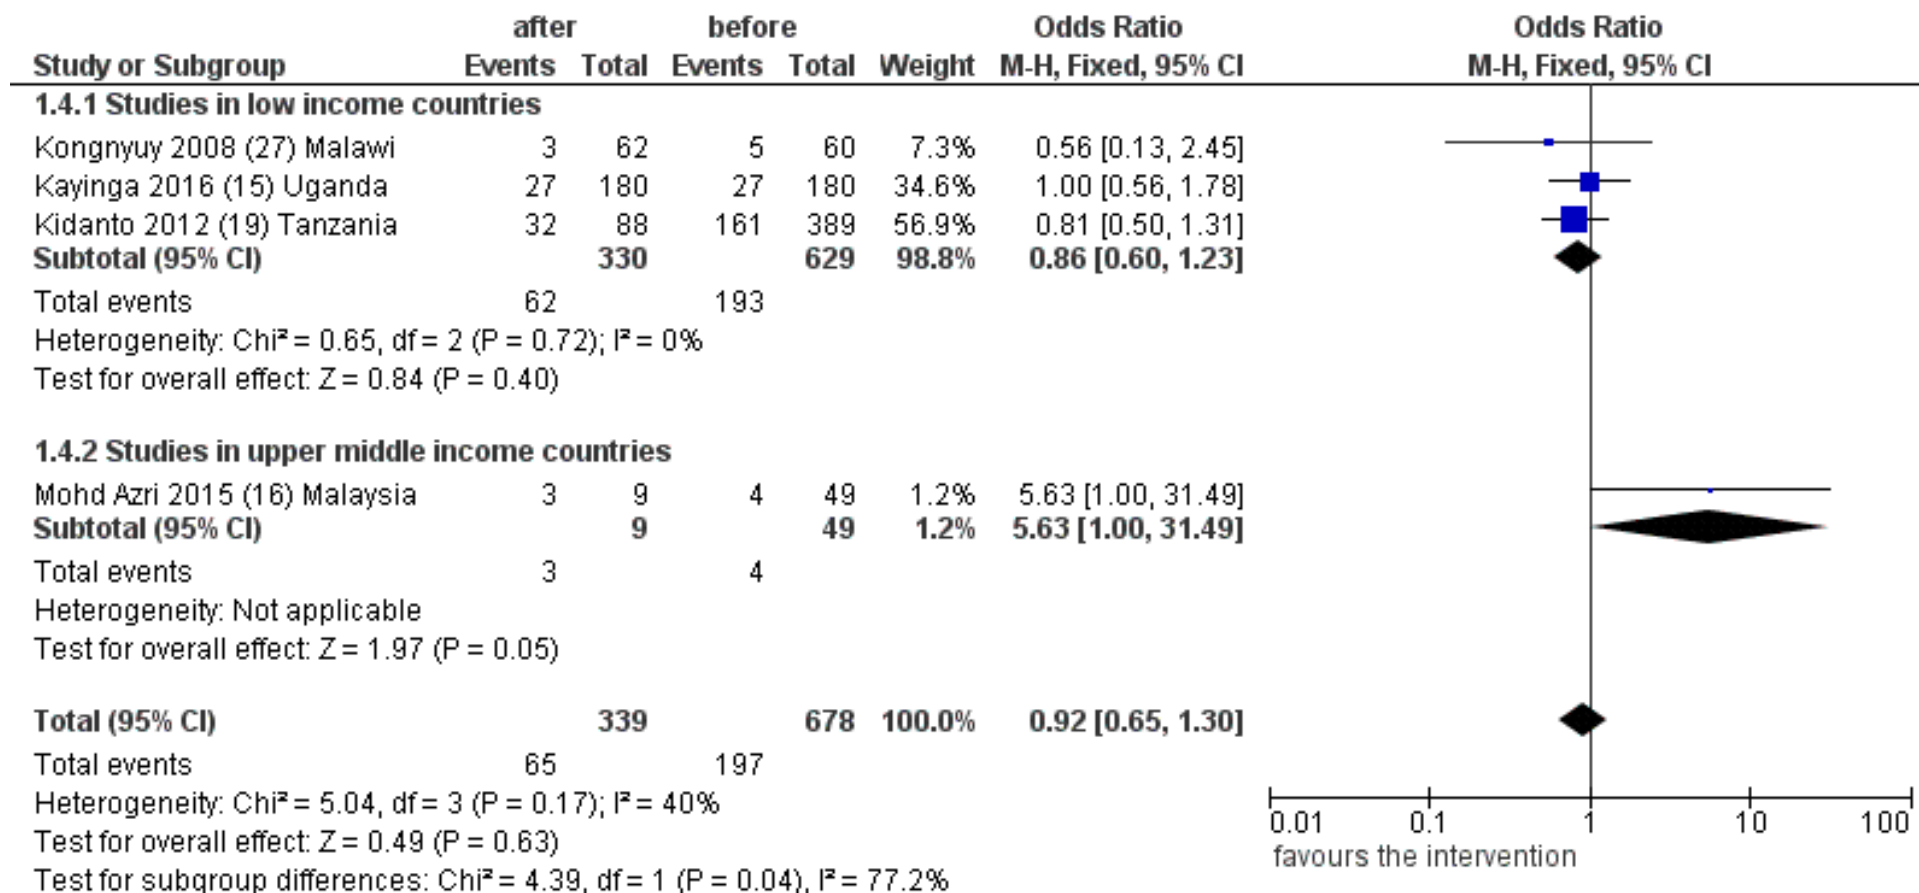

Figure S5. Funnel plot: effect of the NMCR on maternal mortality

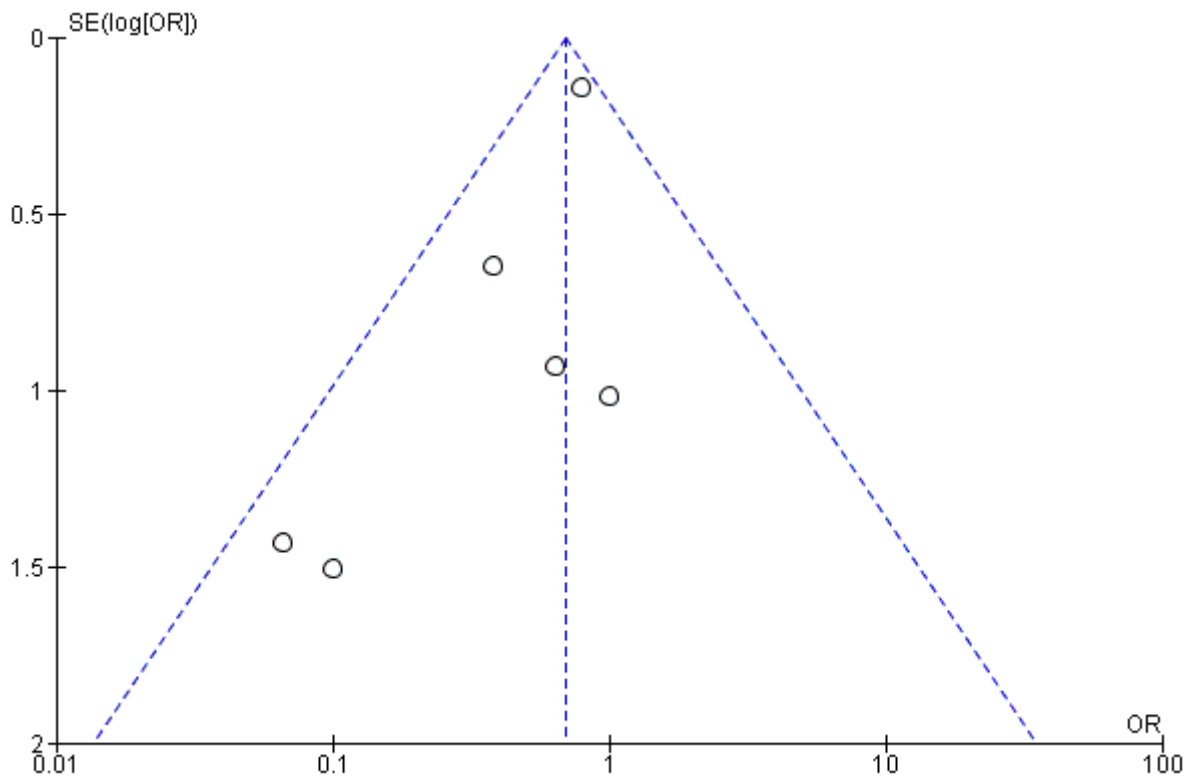

Figure S6. Funnel plot: effect of the NMCR on perinatal mortality

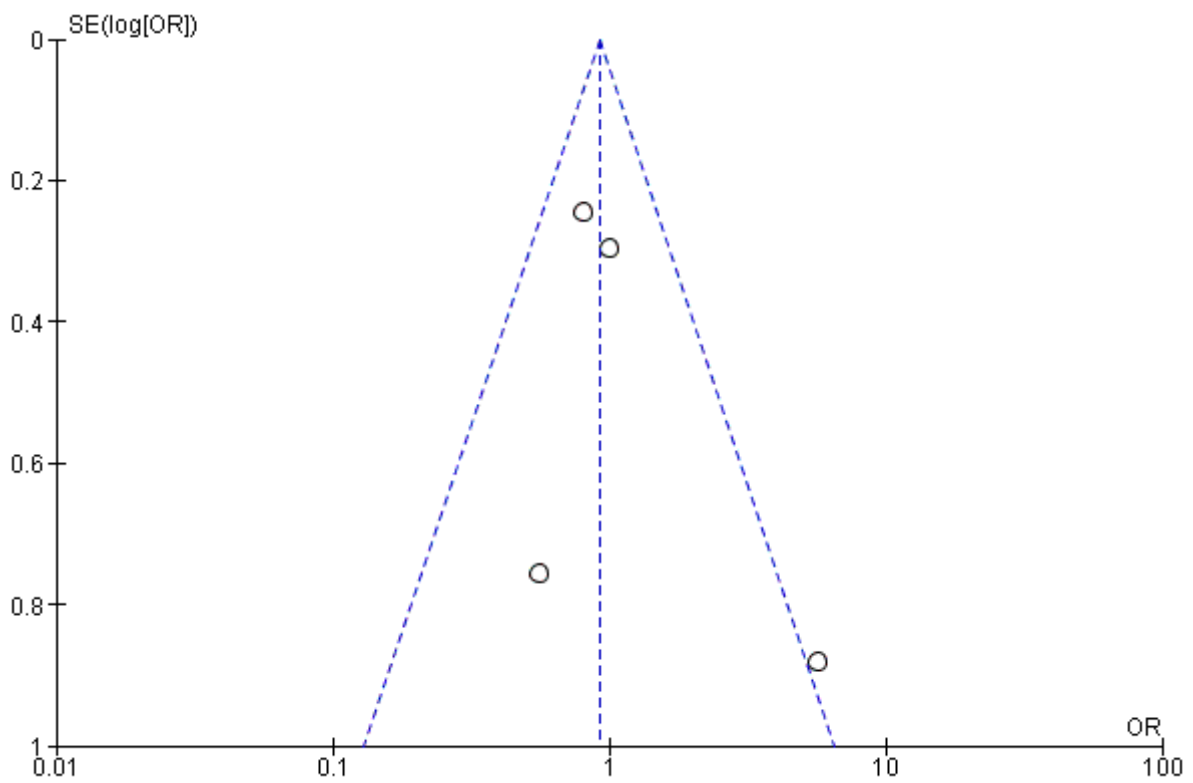

Supplement: bmjopen-2017-019787supp002.pdf [file bmjopen-2017-019787supp002.pdf]
